# Supplementary material for: Antibiotic Resistances of Enterobacteriaceae with Chromosomal Ampc in Urine Cultures: Review and Experience of a Spanish Hospital
Source: MDPI journal article supplement (doi:10.3390/antibiotics12040730), 2023-04-08
Supplement: s1 [file s1]

Table S1: Systematic review of the resistance rates to beta-lactams (%) of Enterobacter cloacae in urine cultures

| Author (year of publication)           | Period    | Place   | N   | AMX | AMC | AMP | FOX | CTX | CAZ   | FEP   | CRO   | C-T  | IPM  | I-R | MEM | ETP   | DOR | TZP   |
|----------------------------------------|-----------|---------|-----|-----|-----|-----|-----|-----|-------|-------|-------|------|------|-----|-----|-------|-----|-------|
| F. Gravey (2017) <sup>20</sup>         | 2012-2015 | France  | 397 | 100 | 100 | 100 | 100 | 52  | 52    |       | 52    |      |      |     |     | 75    |     | 55    |
| H. Seifert (2018) <sup>17</sup>        | 2014-2015 | Germany | 73  |     |     |     |     |     | 39.7  | 4.1   | 45.2  | 30.1 |      |     | 1.4 | 6.8   | 1.4 | 30.1  |
| S. Lob (2020) <sup>18</sup>            | 2015-2017 | Europe  | 253 |     |     |     |     |     | 51.6  | 36.4  |       |      | 5.5  | 4.3 |     |       |     | 39.9  |
| G. Jiménez Guerra (2020) <sup>19</sup> | 2006-2016 | Spain   | 225 |     |     |     |     |     |       | 20    |       |      | 8    |     |     |       |     | 22    |
| Weighted averages                      |           |         | 948 | 100 | 100 | 100 | 100 | 52  | 50.62 | 25.42 | 50.94 | 30.1 | 6.68 | 4.3 | 1.4 | 64.41 | 1.4 | 41.22 |

AMX=Amoxicillin AMC=Amoxicillin-clavulanic AMP=Ampicillin FOX=Cefoxitin CTX=Cefotaxime CAZ=Ceftazidime FEP=Cefepime CRO=Ceftriaxone C-T= Cefotolozane-tazobactam IPM=Imipenem I-R=Imipenem-relebactam  
MEM=Meropenem ETP=Ertapenem DOR=Doripenem TZP=Piperacillin-tazobactam

Table S2: Systematic review of the resistance rates to non-beta-lactams (%) of Enterobacter cloacae in urine cultures

| Author (year of publication)           | Period    | Place   | N   | TIC | AMK   | TOB   | ATM  | GEN   | NAL   | NIT   | FOF   | CIP   | LVX | SXT   | CST  |
|----------------------------------------|-----------|---------|-----|-----|-------|-------|------|-------|-------|-------|-------|-------|-----|-------|------|
| F. Gravey (2017) <sup>20</sup>         | 2012-2015 | France  | 397 | 50  | 94    |       |      | 75    | 60    | 75    | 48    | 67    |     | 71    |      |
| H. Seifert (2018) <sup>17</sup>        | 2014-2015 | Germany | 73  |     | 0     | 2.7   |      |       |       |       | 45.2  | 11    | 6.8 |       | 4.1  |
| S. Lob (2020) <sup>18</sup>            | 2015-2017 | Europe  | 253 |     | 6.3   |       | 45.8 |       |       |       |       | 33.2  |     |       | 4.3  |
| G. Jiménez Guerra (2020) <sup>19</sup> | 2006-2016 | Spain   | 225 |     |       | 17    |      | 18    | 21    | 41    | 22    | 19    |     | 25    |      |
| Weighted averages                      |           |         | 948 | 50  | 53.82 | 13.49 | 45.8 | 54.38 | 45.89 | 54.38 | 39.29 | 42.27 | 6.8 | 54.36 | 4.26 |

TIC=Ticarcillin AMK=Amikacin TOB=Tobramycin ATM=Aztreonam GEN=Gentamicin NAL=Nalidixic acid NIT=Nitrofurantoin FOF= Fosfomycin CIP=Ciprofloxacin LVX=Levofloxacin SXT= Trimethoprim-sulfamethoxazole  
CST=Colistin

Table S3: General annualized resistances (%) of Enterobacter cloacae during 2016-2021

|       | AMC              | AMP                | TIC                | CXM                | FOX              | CFM                | CTX                | CAZ                | FEP                | IPM              | ETP               | TZP               | AMK             | TOB               | GEN               | NAL               | CIP               | LVX               | FOF                | NIT                | SXT                | CST               |
|-------|------------------|--------------------|--------------------|--------------------|------------------|--------------------|--------------------|--------------------|--------------------|------------------|-------------------|-------------------|-----------------|-------------------|-------------------|-------------------|-------------------|-------------------|--------------------|--------------------|--------------------|-------------------|
| 2016  | 50/50<br>(100)   | 50/50<br>(100)     | -                  | 27/50<br>(54)      | 50/50<br>(100)   | -                  | 18/50<br>(36)      | 15/50<br>(30)      | 8/50<br>(16)       | 2/50<br>(4)      | 9/9<br>(100)      | 8/50<br>(16)      | -               | 3/50<br>(6)       | 5/50<br>(10)      | 0/1<br>(0)        | 1/50<br>(2)       | -                 | 14/50<br>(28)      | 18/50<br>(36)      | 12/50<br>(24)      | -                 |
| 2017  | 74/74<br>(100)   | 73/74<br>(98.65)   | -                  | 47/74<br>(63.51)   | 74/74<br>(100)   | -                  | 33/74<br>(44.59)   | 25/74<br>(33.78)   | 14/74<br>(18.92)   | 7/72<br>(9.72)   | 7/10<br>(70)      | 11/74<br>(14.86)  | 0/2<br>(100)    | 8/74<br>(10.81)   | 9/74<br>(12.16)   | 4/11<br>(36.36)   | 12/74<br>(16.22)  | -                 | 29/73<br>(39.72)   | 15/73<br>(20.55)   | 22/74<br>(29.73)   | -                 |
| 2018  | 67/67<br>(100)   | 67/67<br>(100)     | 0/1<br>(0)         | 40/67<br>(59.7)    | 67/67<br>(100)   | -                  | 30/67<br>(44.78)   | 27/67<br>(40.30)   | 11/67<br>(16.42)   | 3/63<br>(4.76)   | 6/7<br>(85.71)    | 11/67<br>(16.42)  | 0/2<br>(100)    | 5/68<br>(7.35)    | 5/68<br>(7.35)    | 11/67<br>(16.42)  | 10/68<br>(14.71)  | 0/1<br>(0)        | 25/67<br>(37.31)   | 13/67<br>(19.4)    | 11/68<br>(16.18)   | -                 |
| 2019  | 87/87<br>(100)   | 87/87<br>(100)     | 41/73<br>(56.16)   | 63/88<br>(71.59)   | 87/87<br>(100)   | 58/69<br>(84.06)   | 39/87<br>(44.83)   | 33/87<br>(37.93)   | 21/88<br>(23.86)   | 4/88<br>(4.55)   | 15/75<br>(20)     | 20/88<br>(22.73)  | 2/73<br>(2.74)  | 10/88<br>(11.36)  | 7/88<br>(79.55)   | 13/87<br>(14.94)  | 13/87<br>(14.94)  | 9/73<br>(12.33)   | 30/88<br>(34.09)   | 23/66<br>(34.85)   | 15/88<br>(17.05)   | 2/29<br>(6.89)    |
| 2020  | 88/88<br>(100)   | 88/88<br>(100)     | 58/84<br>(69.05)   | 74/87<br>(85.06)   | 85/85<br>(100)   | 68/81<br>(83.95)   | 51/88<br>(57.95)   | 49/88<br>(55.68)   | 32/88<br>(36.36)   | 3/88<br>(3.41)   | 23/87<br>(26.44)  | 29/88<br>(32.95)  | 2/88<br>(2.27)  | 14/88<br>(15.91)  | 9/88<br>(10.23)   | 23/87<br>(26.44)  | 23/88<br>(26.14)  | 17/88<br>(19.32)  | 40/88<br>(45.45)   | 30/78<br>(38.46)   | 26/88<br>(29.55)   | 12/84<br>(14.29)  |
| 2021  | 37/37<br>(100)   | 37/37<br>(100)     | 27/37<br>(72.97)   | 32/37<br>(85.49)   | -                | 36/36<br>(100)     | 23/37<br>(62.16)   | 22/37<br>(59.46)   | 21/37<br>(56.76)   | 2/37<br>(5.41)   | 14/37<br>(37.84)  | 16/37<br>(43.24)  | 3/37<br>(8.11)  | 19/37<br>(51.35)  | 18/37<br>(48.65)  | 17/37<br>(45.95)  | 19/37<br>(51.35)  | 18/37<br>(48.65)  | 13/37<br>(35.14)   | 13/37<br>(35.14)   | 20/37<br>(54.05)   | 5/37<br>(13.51)   |
| Total | 403/403<br>(100) | 402/403<br>(99.75) | 126/195<br>(64.61) | 283/403<br>(69.53) | 363/363<br>(100) | 162/186<br>(87.10) | 194/403<br>(48.14) | 171/403<br>(42.43) | 107/404<br>(26.48) | 21/398<br>(5.28) | 74/225<br>(32.90) | 95/404<br>(23.51) | 7/202<br>(3.47) | 59/405<br>(14.57) | 43/405<br>(10.62) | 68/290<br>(23.45) | 78/404<br>(19.31) | 44/199<br>(22.11) | 131/403<br>(32.51) | 112/371<br>(30.19) | 106/405<br>(26.17) | 19/150<br>(12.67) |

AMC=Amoxicillin-clavulanic; AMP=Ampicillin; TIC=Ticarcillin; CXM=Cefuroxime; FOX=Cefoxitin; CFM=Cefixime; CTX=Cefotaxime; CAZ=Ceftazidime; FEP=Cefepime; IPM=Imipenem; ETP=Ertapenem; TZP=Piperacillin-tazobactam; AMK: amikacin; TOB=Tobramycin; GEN=Gentamicin; NAL=Nalidixic acid; CIP=Ciprofloxacin; LVX=levofloxacin; FOF=Fosfomycin NIT=Nitrofurantoin; SXT=Trimethoprim-sulfamethoxazole; CST=Colistin

Table S4: Resistances to beta-lactams (%) of Enterobacter cloacae in 2016.

|      |                           | AMC         |   | AMP         |   | CXM           |               |              | FOX         |   | CTX           |             |               | CAZ           |               | FEP          |              |               | IPM         |              |               | ETP        |   | TZP          |              |               |
|------|---------------------------|-------------|---|-------------|---|---------------|---------------|--------------|-------------|---|---------------|-------------|---------------|---------------|---------------|--------------|--------------|---------------|-------------|--------------|---------------|------------|---|--------------|--------------|---------------|
|      |                           | R           | S | R           | S | R             | I             | S            | R           | S | R             | I           | S             | R             | S             | R            | I            | S             | R           | I            | S             | R          | S | R            | I            | S             |
| 2016 | Total                     | 50<br>(100) |   | 50<br>(100) |   | 27<br>(54)    | 16<br>(32)    | 7<br>(14)    | 50<br>(100) |   | 18<br>(36)    | 2<br>(4)    | 30<br>(60)    | 15<br>(30)    | 35<br>(70)    | 8<br>(16)    | 5<br>(10)    | 37<br>(74)    | 2<br>(4)    | 1<br>(2)     | 47<br>(94)    | 9<br>(100) |   | 8<br>(16)    | 2<br>(4)     | 40<br>(80)    |
|      | Collection bag            | 3<br>(100)  |   | 3<br>(100)  |   | 1<br>(33.33)  | 1<br>(33.33)  | 1<br>(33.33) | 3<br>(100)  |   | 1<br>(33.33)  |             | 2<br>(66.67)  |               | 3<br>(100)    |              |              | 3<br>(100)    |             |              | 3<br>(100)    |            |   |              |              | 3<br>(100)    |
|      | Nephrostomy catheter      | 4<br>(100)  |   | 4<br>(100)  |   | 1<br>(25)     | 2<br>(50)     | 1<br>(25)    | 4<br>(100)  |   | 1<br>(25)     | 1<br>(25)   | 2<br>(50)     |               | 4<br>(100)    |              |              | 4<br>(100)    |             |              | 4<br>(100)    | 1<br>(100) |   |              |              | 4<br>(100)    |
|      | Permanent catheterization | 7<br>(100)  |   | 7<br>(100)  |   | 5<br>(71.43)  | 2<br>(28.57)  |              | 7<br>(100)  |   | 2<br>(28.57)  |             | 5<br>(71.43)  | 2<br>(28.57)  | 5<br>(71.43)  | 1<br>(14.29) |              | 6<br>(85.71)  |             | 1<br>(14.29) | 6<br>(85.71)  | 1<br>(100) |   | 2<br>(28.57) |              | 5<br>(71.43)  |
|      | Clean catch midstream     | 23<br>(100) |   | 23<br>(100) |   | 13<br>(56.52) | 7<br>(30.43)  | 3<br>(13.04) | 23<br>(100) |   | 9<br>(39.13)  |             | 14<br>(60.87) | 8<br>(34.78)  | 15<br>(65.22) | 4<br>(17.39) | 3<br>(13.04) | 16<br>(69.57) | 2<br>(8.69) |              | 21<br>(91.3)  | 4<br>(100) |   | 4<br>(17.39) | 1<br>(4.35)  | 18<br>(78.26) |
|      | Urinary catheter          | 13<br>(100) |   | 13<br>(100) |   | 7<br>(53.85)  | 4<br>(30.77)  | 2<br>(15.38) | 13<br>(100) |   | 5<br>(38.46)  | 1<br>(7.69) | 7<br>(53.85)  | 5<br>(38.46)  | 8<br>(61.54)  | 3<br>(23.08) | 2<br>(15.38) | 8<br>(61.54)  |             |              | 13<br>(100)   | 3<br>(100) |   | 2<br>(15.38) | 1<br>(7.69)  | 10<br>(76.92) |
|      | Children                  | 5<br>(100)  |   | 5<br>(100)  |   | 2<br>(40)     | 2<br>(40)     | 1<br>(20)    | 5<br>(100)  |   | 2<br>(40)     |             | 3<br>(60)     | 1<br>(20)     | 4<br>(80)     |              |              | 5<br>(100)    |             |              | 5<br>(100)    |            |   |              |              | 5<br>(100)    |
|      | Adults                    | 24<br>(100) |   | 24<br>(100) |   | 16<br>(66.67) | 6<br>(25)     | 2<br>(8.33)  | 24<br>(100) |   | 12<br>(50)    |             | 12<br>(50)    | 10<br>(41.67) | 14<br>(58.33) | 7<br>(29.17) | 3<br>(12.5)  | 14<br>(58.33) | 2<br>(8.33) |              | 22<br>(91.67) | 5<br>(100) |   | 6<br>(25)    | 1<br>(4.17)  | 17<br>(70.83) |
|      | Elderly                   | 21<br>(100) |   | 21<br>(100) |   | 9<br>(42.86)  | 8<br>(38.09)  | 4<br>(19.05) | 21<br>(100) |   | 4<br>(19.05)  | 2<br>(9.52) | 15<br>(71.43) | 4<br>(19.05)  | 17<br>(80.95) | 1<br>(4.76)  | 2<br>(9.52)  | 18<br>(85.71) |             | 1<br>(4.76)  | 20<br>(95.24) | 4<br>(100) |   | 2<br>(9.52)  | 1<br>(4.76)  | 18<br>(85.71) |
|      | Outpatient                | 32<br>(100) |   | 32<br>(100) |   | 14<br>(43.75) | 11<br>(34.38) | 7<br>(21.88) | 32<br>(100) |   | 8<br>(25)     | 2<br>(6.25) | 22<br>(68.75) | 8<br>(25)     | 24<br>(75)    | 3<br>(9.38)  | 2<br>(6.25)  | 27<br>(84.38) | 2<br>(6.25) |              | 30<br>(93.75) | 5<br>(100) |   | 5<br>(15.63) |              | 27<br>(84.38) |
|      | Inpatient                 | 18<br>(100) |   | 18<br>(100) |   | 13<br>(72.22) | 5<br>(27.78)  |              | 18<br>(100) |   | 10<br>(55.56) |             | 8<br>(44.44)  | 7<br>(38.89)  | 11<br>(61.11) | 5<br>(27.78) | 3<br>(16.67) | 10<br>(55.56) |             | 1<br>(5.56)  | 17<br>(94.44) | 4<br>(100) |   | 3<br>(16.67) | 2<br>(11.11) | 13<br>(72.22) |
|      | Men                       | 33<br>(100) |   | 33<br>(100) |   | 18<br>(54.55) | 9<br>(27.27)  | 6<br>(18.18) | 33<br>(100) |   | 12<br>(36.36) | 1<br>(3.03) | 20<br>(60.61) | 10<br>(30.3)  | 23<br>(69.69) | 4<br>(12.12) | 5<br>(15.15) | 24<br>(72.73) | 1<br>(3.03) | 1<br>(3.03)  | 31<br>(93.94) | 6<br>(100) |   | 5<br>(15.15) | 2<br>(6.06)  | 26<br>(78.79) |
|      | Women                     | 17<br>(100) |   | 17<br>(100) |   | 9<br>(52.94)  | 7<br>(41.18)  | 1<br>(5.88)  | 17<br>(100) |   | 6<br>(35.29)  | 1<br>(5.88) | 10<br>(58.82) | 5<br>(29.41)  | 12<br>(70.59) | 4<br>(23.53) |              | 13<br>(76.47) |             |              | 16<br>(94.12) | 3<br>(100) |   | 3<br>(17.65) |              | 14<br>(82.35) |

AMC= Amoxicillin-clavulanic AMP=Ampicillin CXM=Cefuroxime FOX=Cefoxitin CTX=Cefotaxime CAZ=Ceftazidime FEP=Cefepime IPM=Imipenem ETP=Ertapenem TZP=Piperacillin-tazobactam.

Table S5: Resistances to beta-lactams (%) of Enterobacter cloacae in 2017.

|      |                           | AMC         |   | AMP           |             | CXM           |               |             | FOX         |   | CTX           |              |               | CAZ           |               | FEP           |               |               | IPM          |               | ETP          |              | TZP           |               |               |           |
|------|---------------------------|-------------|---|---------------|-------------|---------------|---------------|-------------|-------------|---|---------------|--------------|---------------|---------------|---------------|---------------|---------------|---------------|--------------|---------------|--------------|--------------|---------------|---------------|---------------|-----------|
|      |                           | R           | S | R             | S           | R             | I             | S           | R           | S | R             | I            | S             | R             | S             | R             | I             | S             | R            | S             | R            | S            | R             | I             | S             |           |
| 2017 | Total                     | 74<br>(100) |   | 73<br>(98.65) | 1<br>(1.35) | 47<br>(63.51) | 25<br>(33.78) | 2<br>(2.7)  | 74<br>(100) |   | 33<br>(44.59) | 4<br>(5.41)  | 37<br>(50)    | 25<br>(33.78) | 49<br>(66.22) | 14<br>(18.92) | 11<br>(14.86) | 49<br>(66.22) | 7<br>(9.72)  | 65<br>(90.28) | 7<br>(70)    | 3<br>(30)    | 11<br>(14.86) | 10<br>(13.51) | 53<br>(71.62) |           |
|      | Collection bag            | 6<br>(100)  |   | 6<br>(100)    |             | 5<br>(83.33)  | 1<br>(16.67)  |             | 6<br>(100)  |   | 3<br>(50)     | 1<br>(16.67) | 2<br>(33.33)  | 2<br>(33.33)  | 4<br>(66.67)  |               | 3<br>(50)     | 3<br>(50)     |              | 6<br>(100)    |              |              |               | 1<br>(16.67)  | 5<br>(83.33)  |           |
|      | Nephrostomy catheter      |             |   |               |             |               |               |             |             |   |               |              |               |               |               |               |               |               |              |               |              |              |               |               |               |           |
|      | Permanent catheterization | 15<br>(100) |   | 15<br>(100)   |             | 10<br>(66.67) | 5<br>(33.33)  |             | 15<br>(100) |   | 9<br>(60)     | 2<br>(13.33) | 4<br>(26.67)  | 7<br>(46.67)  | 8<br>(53.33)  | 4<br>(26.67)  | 2<br>(13.33)  | 9<br>(60)     |              | 15<br>(100)   |              | 1<br>(100)   |               | 4<br>(26.67)  | 2<br>(13.33)  | 9<br>(60) |
|      | Clean catch midstream     | 29<br>(100) |   | 28<br>(96.55) | 1<br>(3.45) | 14<br>(48.28) | 13<br>(44.83) | 2<br>(6.89) | 29<br>(100) |   | 8<br>(27.59)  |              | 21<br>(72.41) | 6<br>(20.69)  | 23<br>(79.31) | 4<br>(13.79)  | 2<br>(6.89)   | 23<br>(79.31) | 3<br>(11.11) | 24<br>(88.89) | 3<br>(75)    | 1<br>(25)    | 3<br>(10.34)  | 4<br>(13.79)  | 22<br>(75.86) |           |
|      | Urinary catheter          | 24<br>(100) |   | 24<br>(100)   |             | 18<br>(75)    | 6<br>(25)     |             | 24<br>(100) |   | 13<br>(54.17) | 1<br>(4.17)  | 10<br>(41.67) | 10<br>(41.67) | 14<br>(58.33) | 6<br>(25)     | 4<br>(16.67)  | 14<br>(58.33) | 4<br>(16.67) | 20<br>(83.33) | 4<br>(80)    | 1<br>(20)    | 4<br>(16.67)  | 3<br>(12.5)   | 17<br>(70.83) |           |
|      | Children                  | 11<br>(100) |   | 11<br>(100)   |             | 8<br>(72.73)  | 3<br>(27.27)  |             | 11<br>(100) |   | 6<br>(54.55)  |              | 5<br>(45.45)  | 3<br>(27.27)  | 8<br>(72.73)  | 1<br>(9.09)   | 4<br>(36.36)  | 6<br>(54.55)  |              | 11<br>(100)   |              |              |               | 1<br>(9.09)   | 10<br>(90.91) |           |
|      | Adults                    | 22<br>(100) |   | 22<br>(100)   |             | 13<br>(59.09) | 8<br>(36.36)  | 1<br>(4.55) | 22<br>(100) |   | 9<br>(40.91)  | 2<br>(9.09)  | 11<br>(50)    | 9<br>(40.91)  | 13<br>(59.09) | 4<br>(18.18)  | 3<br>(13.64)  | 15<br>(68.18) | 4<br>(18.18) | 18<br>(81.82) | 3<br>(75)    | 1<br>(25)    | 4<br>(18.18)  | 4<br>(18.18)  | 14<br>(63.64) |           |
|      | Elderly                   | 41<br>(100) |   | 40<br>(97.56) | 1<br>(2.44) | 26<br>(63.41) | 14<br>(34.15) | 1<br>(2.44) | 41<br>(100) |   | 18<br>(43.9)  | 2<br>(4.88)  | 21<br>(51.22) | 13<br>(31.71) | 28<br>(68.29) | 9<br>(21.95)  | 4<br>(9.76)   | 28<br>(68.19) | 3<br>(7.69)  | 36<br>(92.31) | 4<br>(66.67) | 2<br>(33.33) | 7<br>(17.07)  | 5<br>(12.19)  | 29<br>(70.73) |           |
|      | Outpatient                | 32<br>(100) |   | 32<br>(100)   |             | 19<br>(59.38) | 12<br>(37.5)  | 1<br>(3.13) | 32<br>(100) |   | 14<br>(43.75) | 2<br>(6.25)  | 16<br>(50)    | 11<br>(34.38) | 21<br>(65.63) | 7<br>(21.88)  | 4<br>(12.5)   | 21<br>(65.63) | 4<br>(12.5)  | 28<br>(87.5)  | 3<br>(60)    | 2<br>(40)    | 6<br>(18.75)  | 3<br>(9.38)   | 23<br>(71.88) |           |
|      | Inpatient                 | 42<br>(100) |   | 41<br>(97.62) | 1<br>(2.38) | 28<br>(66.67) | 13<br>(30.95) | 1<br>(2.38) | 42<br>(100) |   | 19<br>(45.24) | 2<br>(4.76)  | 21<br>(50)    | 14<br>(33.33) | 28<br>(66.67) | 7<br>(16.67)  | 7<br>(6.67)   | 28<br>(66.67) | 3<br>(7.5)   | 37<br>(92.5)  | 4<br>(80)    | 1<br>(20)    | 5<br>(11.9)   | 7<br>(16.67)  | 30<br>(71.43) |           |
|      | Men                       | 47<br>(100) |   | 46<br>(97.87) | 1<br>(2.13) | 26<br>(55.32) | 19<br>(40.43) | 2<br>(4.26) | 47<br>(100) |   | 19<br>(40.43) | 3<br>(6.38)  | 25<br>(53.19) | 14<br>(29.79) | 33<br>(70.21) | 7<br>(14.89)  | 8<br>(17.02)  | 32<br>(68.09) | 1<br>(2.13)  | 46<br>(97.87) | 2<br>(50)    | 2<br>(50)    | 6<br>(12.77)  | 5<br>(10.64)  | 36<br>(76.59) |           |
|      | Women                     | 27<br>(100) |   | 27<br>(100)   |             | 21<br>(77.78) | 6<br>(22.22)  |             | 27<br>(100) |   | 14<br>(51.85) | 1<br>(3.7)   | 12<br>(44.44) | 11<br>(40.74) | 16<br>(59.26) | 7<br>(25.93)  | 3<br>(11.11)  | 17<br>(62.96) | 6<br>(24)    | 19<br>(76)    | 5<br>(83.33) | 1<br>(18.67) | 5<br>(18.52)  | 5<br>(18.52)  | 17<br>(62.96) |           |

AMC= Amoxicillin-clavulanic AMP=Ampicillin CXM=Cefuroxime FOX=Cefoxitin CTX=Cefotaxime CAZ=Ceftazidime FEP=Cefepime IPM=Imipenem ETP=Ertapenem TZP=Piperacillin-tazobactam

Table S6: Resistances to beta-lactams (%) of Enterobacter cloacae in 2018.

|      |                           | AMC         |   | AMP         |   | TIC        |   | CXM           |               |              | FOX         |   | CTX           |             |               | CAZ           |               | FEP           |              |               | IPM         |              |               | ETP          |              | TZP           |              |               |
|------|---------------------------|-------------|---|-------------|---|------------|---|---------------|---------------|--------------|-------------|---|---------------|-------------|---------------|---------------|---------------|---------------|--------------|---------------|-------------|--------------|---------------|--------------|--------------|---------------|--------------|---------------|
|      |                           | R           | S | R           | S | R          | S | R             | I             | S            | R           | S | R             | I           | S             | R             | S             | R             | I            | S             | R           | I            | S             | R            | S            | R             | I            | S             |
| 2018 | Total                     | 67<br>(100) |   | 67<br>(100) |   | 1<br>(100) |   | 40<br>(59.7)  | 22<br>(32.84) | 5<br>(7.46)  | 67<br>(100) |   | 30<br>(44.78) | 4<br>(5.97) | 33<br>(49.25) | 27<br>(39.71) | 41<br>(60.29) | 11<br>(16.42) | 5<br>(7.46)  | 51<br>(76.12) | 3<br>(4.76) | 4<br>(6.35)  | 56<br>(88.89) | 6<br>(85.71) | 1<br>(14.29) | 11<br>(16.18) | 8<br>(11.76) | 49<br>(72.06) |
|      | Collection bag            | 1<br>(100)  |   | 1<br>(100)  |   |            |   | 1<br>(100)    |               |              | 1<br>(100)  |   |               |             | 1<br>(100)    |               |               |               |              | 1<br>(100)    |             |              |               |              |              |               |              | 1<br>(100)    |
|      | Nephrostomy catheter      | 2<br>(100)  |   | 2<br>(100)  |   |            |   | 1<br>(50)     | 1<br>(50)     |              | 2<br>(100)  |   | 1<br>(50)     | 1<br>(50)   |               | 2<br>(100)    |               |               |              | 2<br>(100)    |             |              |               |              |              |               |              | 2<br>(100)    |
|      | Permanent catheterization | 17<br>(100) |   | 17<br>(100) |   |            |   | 10<br>(58.82) | 5<br>(29.41)  | 2<br>(11.76) | 17<br>(100) |   | 9<br>(52.94)  | 1<br>(5.88) | 7<br>(41.18)  | 9<br>(52.94)  | 8<br>(47.06)  | 4<br>(23.53)  | 2<br>(11.76) | 11<br>(64.71) | 1<br>(7.14) | 2<br>(14.29) | 11<br>(78.57) | 1<br>(100)   |              | 4<br>(23.53)  | 2<br>(11.76) | 11<br>(64.71) |
|      | Clean catch midstream     | 33<br>(100) |   | 33<br>(100) |   |            |   | 22<br>(66.67) | 9<br>(27.27)  | 2<br>(6.06)  | 33<br>(100) |   | 14<br>(42.42) | 2<br>(6.06) | 17<br>(51.52) | 11<br>(32.35) | 23<br>(67.65) | 3<br>(9.09)   | 2<br>(6.06)  | 28<br>(84.85) | 2<br>(6.06) | 2<br>(6.06)  | 29<br>(87.88) | 3<br>(75)    | 1<br>(25)    | 5<br>(14.71)  | 3<br>(8.82)  | 26<br>(76.47) |
|      | Urinary catheter          | 14<br>(100) |   | 14<br>(100) |   |            |   | 7<br>(50)     | 6<br>(42.86)  | 1<br>(7.43)  | 14<br>(100) |   | 7<br>(50)     |             | 7<br>(50)     | 7<br>(50)     | 7<br>(50)     | 4<br>(28.57)  | 1<br>(7.14)  | 9<br>(64.29)  |             |              | 13<br>(100)   | 2<br>(100)   |              | 2<br>(14.29)  | 3<br>(21.43) | 9<br>(64.29)  |
|      | Children                  | 10<br>(100) |   | 10<br>(100) |   |            |   | 5<br>(50)     | 5<br>(50)     |              | 10<br>(100) |   | 4<br>(40)     |             | 6<br>(60)     | 4<br>(40)     | 6<br>(60)     | 4<br>(40)     |              | 6<br>(60)     |             |              | 10<br>(100)   | 1<br>(100)   |              | 2<br>(20)     | 1<br>(10)    | 7<br>(70)     |
|      | Adults                    | 19<br>(100) |   | 19<br>(100) |   | 1<br>(100) |   | 14<br>(73.68) | 3<br>(15.79)  | 2<br>(10.53) | 19<br>(100) |   | 8<br>(42.11)  | 1<br>(5.26) | 10<br>(52.63) | 7<br>(35)     | 13<br>(65)    | 2<br>(10.53)  | 1<br>(5.26)  | 16<br>(84.21) | 1<br>(5.26) | 1<br>(5.26)  | 17<br>(89.47) | 3<br>(100)   |              | 2<br>(10)     | 1<br>(5)     | 17<br>(85)    |
|      | Elderly                   | 38<br>(100) |   | 38<br>(100) |   |            |   | 21<br>(55.26) | 14<br>(36.84) | 3<br>(78.95) | 38<br>(100) |   | 18<br>(47.37) | 3<br>(7.89) | 17<br>(44.74) | 16<br>(42.11) | 22<br>(57.89) | 5<br>(13.16)  | 4<br>(10.53) | 29<br>(76.32) | 2<br>(5.88) | 3<br>(8.82)  | 29<br>(85.29) | 2<br>(66.67) | 1<br>(33.33) | 7<br>(18.42)  | 6<br>(15.79) | 25<br>(65.79) |
|      | Outpatient                | 35<br>(100) |   | 35<br>(100) |   |            |   | 22<br>(62.86) | 11<br>(31.43) | 2<br>(5.71)  | 35<br>(100) |   | 16<br>(45.71) | 3<br>(8.57) | 16<br>(45.71) | 14<br>(40)    | 21<br>(60)    | 5<br>(14.71)  | 2<br>(5.88)  | 27<br>(79.41) | 2<br>(6.06) | 1<br>(3.03)  | 30<br>(90.91) | 5<br>(100)   |              | 5<br>(14.29)  | 3<br>(8.57)  | 27<br>(77.14) |
|      | Inpatient                 | 32<br>(100) |   | 32<br>(100) |   | 1<br>(100) |   | 18<br>(56.25) | 11<br>(34.38) | 3<br>(9.38)  | 32<br>(100) |   | 14<br>(43.75) | 1<br>(3.13) | 17<br>(53.13) | 13<br>(39.39) | 20<br>(60.61) | 6<br>(18.18)  | 3<br>(9.09)  | 24<br>(72.73) | 1<br>(3.33) | 3<br>(10)    | 26<br>(86.67) | 1<br>(50)    | 1<br>(50)    | 6<br>(18.18)  | 5<br>(15.15) | 22<br>(66.67) |
|      | Men                       | 40<br>(100) |   | 40<br>(100) |   | 1<br>(100) |   | 23<br>(57.5)  | 14<br>(35)    | 3<br>(7.5)   | 40<br>(100) |   | 19<br>(47.5)  | 2<br>(5)    | 19<br>(47.5)  | 16<br>(39.02) | 25<br>(60.98) | 7<br>(17.5)   | 2<br>(5)     | 31<br>(77.5)  | 2<br>(5.41) | 2<br>(5.41)  | 33<br>(89.19) | 3<br>(75)    | 1<br>(25)    | 6<br>(14.63)  | 6<br>(14.63) | 29<br>(70.73) |
|      | Women                     | 27<br>(100) |   | 27<br>(100) |   |            |   | 17<br>(62.96) | 8<br>(29.63)  | 2<br>(7.41)  | 27<br>(100) |   | 11<br>(40.74) | 2<br>(7.41) | 14<br>(51.85) | 11<br>(40.74) | 16<br>(59.26) | 4<br>(14.81)  | 3<br>(11.11) | 20<br>(74.07) | 1<br>(3.85) | 2<br>(7.69)  | 23<br>(88.46) | 3<br>(100)   |              | 5<br>(18.52)  | 2<br>(7.41)  | 20<br>(74.07) |

AMC= Amoxicillin-clavulanic AMP=Ampicillin CXM=Cefuroxime FOX=Cefoxitin CTX=Cefotaxime CAZ=Ceftazidime FEP=Cefepime IPM=Imipenem ETP=Ertapenem TZP=Piperacillin-tazobactam.

Table S7: Resistances to beta-lactams (%) of *Enterobacter cloacae* in 2019.

|  |                           | AMC         |             | AMP           |              | TIC           |               | 5           |               | CXM         |               | 5             |               | FOX          |               | CFM           |              | 5             |               | CTX           |               | 5           |               | CAZ           |               | 5             |               | FEP           |               | 5             |               | IPM |   | 5          |   | ETP |            | 5 |   | TZP        |  | 5 |  |
|--|---------------------------|-------------|-------------|---------------|--------------|---------------|---------------|-------------|---------------|-------------|---------------|---------------|---------------|--------------|---------------|---------------|--------------|---------------|---------------|---------------|---------------|-------------|---------------|---------------|---------------|---------------|---------------|---------------|---------------|---------------|---------------|-----|---|------------|---|-----|------------|---|---|------------|--|---|--|
|  |                           | R           | R           | R             | I            | 5             |               | R           | I             | 5           | R             | I             | 5             | R            | I             | 5             | R            | I             | 5             | R             | I             | 5           | R             | I             | 5             | R             | I             | 5             | R             | I             | 5             | R   | I | 5          | R | I   | 5          | R | I | 5          |  |   |  |
|  | Total                     | 87<br>(100) | 87<br>(100) | 41<br>(56,16) | 4<br>(5,48)  | 28<br>(38,36) | 63<br>(71,59) | 4<br>(4,55) | 21<br>(23,86) | 87<br>(100) | 58<br>(84,06) | 11<br>(15,94) | 39<br>(44,83) | 6<br>(6,89)  | 42<br>(48,28) | 33<br>(37,93) | 8<br>(9,19)  | 46<br>(52,87) | 21<br>(23,86) | 1<br>(1,14)   | 66<br>(75)    | 4<br>(4,55) | 5<br>(5,68)   | 79<br>(89,77) | 15<br>(20)    | 11<br>(14,67) | 49<br>(65,33) | 20<br>(22,73) | 8<br>(9,09)   | 60<br>(68,18) |               |     |   |            |   |     |            |   |   |            |  |   |  |
|  | Collection bag            | 1<br>(100)  | 1<br>(100)  | 1<br>(100)    |              |               | 1<br>(100)    |             |               | 1<br>(100)  | 1<br>(100)    |               | 1<br>(100)    | 2<br>(2)     |               | 1<br>(100)    |              |               | 1<br>(100)    |               |               |             |               |               | 1<br>(100)    |               |               | 1<br>(100)    |               |               | 1<br>(100)    |     |   | 1<br>(100) |   |     | 1<br>(100) |   |   | 1<br>(100) |  |   |  |
|  | Nephrostomy catheter      | 4<br>(100)  | 4<br>(100)  | 1<br>(33,33)  | 1<br>(33,33) | 3<br>(33,33)  | 3<br>(75)     |             | 1<br>(25)     | 4<br>(100)  | 2<br>(66,67)  | 1<br>(33,33)  | 2<br>(50)     | 1<br>(25)    | 1<br>(25)     | 2<br>(50)     |              | 2<br>(50)     |               | 1<br>(25)     | 3<br>(75)     |             |               |               | 2<br>(50)     | 2<br>(50)     | 1<br>(25)     | 1<br>(25)     | 1<br>(25)     | 1<br>(25)     | 2<br>(50)     |     |   | 2<br>(50)  |   |     | 2<br>(50)  |   |   | 2<br>(50)  |  |   |  |
|  | Permanent catheterization | 17<br>(100) | 17<br>(100) | 8<br>(53,33)  | 1<br>(6,67)  | 6<br>(40)     | 10<br>(58,82) | 1<br>(5,88) | 6<br>(35,29)  | 17<br>(100) | 14<br>(93,33) | 1<br>(6,67)   | 8<br>(47,06)  | 1<br>(5,88)  | 8<br>(47,06)  | 6<br>(35,29)  | 2<br>(11,76) | 9<br>(52,94)  | 6<br>(35,29)  | 1<br>(25)     | 11<br>(64,71) |             |               | 1<br>(5,88)   | 16<br>(94,12) | 5<br>(31,25)  | 1<br>(6,25)   | 2<br>(50)     | 10<br>(62,5)  | 3<br>(17,65)  | 11<br>(64,71) |     |   |            |   |     |            |   |   |            |  |   |  |
|  | Clean catch midstream     | 44<br>(100) | 45<br>(100) | 19<br>(54,29) | 1<br>(2,86)  | 15<br>(42,86) | 33<br>(73,33) | 2<br>(4,44) | 10<br>(22,22) | 44<br>(100) | 25<br>(78,13) | 7<br>(21,88)  | 17<br>(37,78) | 4<br>(8,89)  | 24<br>(53,33) | 15<br>(33,33) | 2<br>(4,44)  | 28<br>(62,22) | 8<br>(17,78)  |               | 37<br>(82,22) | 2<br>(4,44) | 2<br>(4,44)   | 41<br>(91,11) | 4<br>(11,43)  | 7<br>(20)     | 24<br>(68,57) | 9<br>(20)     | 3<br>(6,67)   | 33<br>(73,33) |               |     |   |            |   |     |            |   |   |            |  |   |  |
|  | Urinary catheter          | 21<br>(100) | 21<br>(100) | 12<br>(63,16) | 1<br>(5,26)  | 6<br>(31,58)  | 16<br>(76,19) | 1<br>(4,76) | 4<br>(19,05)  | 21<br>(100) | 16<br>(88,89) | 2<br>(11,11)  | 11<br>(55)    | 9<br>(45)    | 9<br>(45)     | 4<br>(20)     | 7<br>(35)    | 6<br>(28,57)  |               | 15<br>(71,43) | 2<br>(9,52)   | 2<br>(9,52) | 17<br>(80,95) | 4<br>(21,05)  | 2<br>(10,53)  | 13<br>(68,42) | 6<br>(28,57)  | 1<br>(4,76)   | 14<br>(66,67) |               |               |     |   |            |   |     |            |   |   |            |  |   |  |
|  | Children                  | 3<br>(100)  | 3<br>(100)  | 2<br>(66,67)  |              | 1<br>(33,33)  | 4<br>(80)     |             | 1<br>(20)     | 3<br>(100)  | 1<br>(50)     | 1<br>(50)     | 3<br>(75)     |              | 1<br>(25)     | 2<br>(50)     |              | 2<br>(40)     |               | 4<br>(80)     |               |             |               | 3<br>(100)    | 1<br>(33,33)  | 2<br>(66,67)  | 1<br>(20)     |               |               | 4<br>(80)     |               |     |   |            |   |     |            |   |   |            |  |   |  |
|  | Adults                    | 30<br>(100) | 30<br>(100) | 10<br>(43,48) | 1<br>(4,35)  | 12<br>(52,17) | 23<br>(76,67) | 1<br>(3,33) | 6<br>(20)     | 30<br>(100) | 19<br>(90,48) | 2<br>(9,52)   | 12<br>(40)    | 3<br>(10)    | 15<br>(50)    | 11<br>(36,67) | 2<br>(6,67)  | 17<br>(56,67) | 6<br>(20)     |               | 24<br>(80)    | 2<br>(6,67) | 2<br>(6,67)   | 28<br>(93,33) | 4<br>(17,39)  | 7<br>(23,33)  | 2<br>(6,67)   | 21<br>(70)    |               |               |               |     |   |            |   |     |            |   |   |            |  |   |  |
|  | Elderly                   | 52<br>(100) | 53<br>(100) | 29<br>(61,7)  | 3<br>(6,38)  | 15<br>(31,91) | 36<br>(67,92) | 3<br>(5,66) | 14<br>(26,42) | 52<br>(100) | 38<br>(82,61) | 8<br>(17,39)  | 24<br>(45,28) | 3<br>(5,66)  | 26<br>(49,06) | 20<br>(37,74) | 6<br>(11,32) | 27<br>(50,94) | 14<br>(26,42) | 1<br>(1,89)   | 38<br>(71,69) | 4<br>(7,55) | 3<br>(5,66)   | 46<br>(86,79) | 6<br>(12,24)  | 12<br>(22,64) | 6<br>(11,32)  | 35<br>(66,04) |               |               |               |     |   |            |   |     |            |   |   |            |  |   |  |
|  | Outpatient                | 34<br>(100) | 35<br>(100) | 17<br>(60,71) | 2<br>(7,14)  | 9<br>(32,14)  | 26<br>(74,29) | 3<br>(8,57) | 6<br>(17,14)  | 34<br>(100) | 25<br>(96,15) | 1<br>(3,85)   | 16<br>(45,71) | 4<br>(11,43) | 15<br>(42,86) | 13<br>(37,14) | 3<br>(8,57)  | 19<br>(54,29) | 8<br>(22,86)  |               | 27<br>(77,14) | 2<br>(5,71) | 4<br>(11,43)  | 29<br>(82,86) | 7<br>(25)     | 3<br>(10,71)  | 18<br>(64,29) | 7<br>(20)     | 2<br>(5,71)   | 26<br>(74,29) |               |     |   |            |   |     |            |   |   |            |  |   |  |
|  | Inpatient                 | 53<br>(100) | 53<br>(100) | 24<br>(53,33) | 2<br>(4,44)  | 19<br>(42,22) | 37<br>(69,81) | 1<br>(1,89) | 15<br>(28,3)  | 53<br>(100) | 33<br>(76,74) | 10<br>(23,26) | 23<br>(44,23) | 2<br>(3,85)  | 27<br>(51,92) | 20<br>(38,46) | 5<br>(9,62)  | 27<br>(51,92) | 13<br>(24,53) | 1<br>(1,89)   | 39<br>(73,58) | 2<br>(3,77) | 1<br>(1,89)   | 50<br>(94,34) | 8<br>(17,02)  | 13<br>(24,53) | 6<br>(11,32)  | 34<br>(54,15) |               |               |               |     |   |            |   |     |            |   |   |            |  |   |  |
|  | Men                       | 55<br>(100) | 56<br>(100) | 21<br>(46,67) | 3<br>(6,67)  | 21<br>(46,67) | 39<br>(69,64) | 4<br>(7,14) | 13<br>(23,21) | 55<br>(100) | 33<br>(80,49) | 8<br>(19,51)  | 25<br>(45,45) | 3<br>(5,45)  | 27<br>(49,09) | 20<br>(36,36) | 6<br>(10,91) | 29<br>(52,73) | 13<br>(23,21) | 1<br>(1,79)   | 42<br>(75)    | 3<br>(5,36) | 3<br>(5,36)   | 50<br>(89,29) | 12<br>(25,53) | 6<br>(12,77)  | 29<br>(61,7)  | 13<br>(23,21) | 5<br>(8,93)   | 38<br>(67,86) |               |     |   |            |   |     |            |   |   |            |  |   |  |
|  | Women                     | 32<br>(100) | 32<br>(100) | 20<br>(71,43) | 1<br>(3,57)  | 7<br>(25)     | 24<br>(75)    |             | 8<br>(25)     | 32<br>(100) | 25<br>(89,29) | 3<br>(10,71)  | 14<br>(43,75) | 3<br>(9,38)  | 15<br>(46,88) | 13<br>(40,63) | 2<br>(6,25)  | 17<br>(53,13) | 8<br>(25)     |               | 24<br>(75)    | 1<br>(3,13) | 2<br>(6,25)   | 29<br>(90,63) | 3<br>(10,71)  | 5<br>(17,86)  | 7<br>(21,88)  | 3<br>(9,38)   | 22<br>(68,75) |               |               |     |   |            |   |     |            |   |   |            |  |   |  |

AMC= Amoxicillin-clavulanic acid; AMP=Ampicillin TIC= ticarcillin CXM=Cefuroxime FOX=Cefoxitin CFM= Cefixime CTX=Cefotaxime CAZ=Ceftazidime FEP=Cefepime IPM=Imipenem ETP=Ertapenem TZP=Piperacillin-tazobactam.

Table S8: Resistances to beta-lactams (%) of *Enterobacter cloacae* in 2020.

|       |                       | AMC<br>R    | AMP<br>R      | T1C<br>R I S  |              |               | CXM<br>R S    |               | FOX<br>R      | CFM<br>R S    |               | CTX<br>R I S  |               |               | CAZ<br>R I S  |               |               | FEP<br>R S    |               | IPM<br>R I S |               |               | ETP<br>R I S  |               |               | TZP<br>R I S  |               |               |
|-------|-----------------------|-------------|---------------|---------------|--------------|---------------|---------------|---------------|---------------|---------------|---------------|---------------|---------------|---------------|---------------|---------------|---------------|---------------|---------------|--------------|---------------|---------------|---------------|---------------|---------------|---------------|---------------|---------------|
|       | Total                 | 88<br>(100) | 88<br>(100)   | 58<br>(69.05) | 5<br>(5.95)  | 21<br>(25)    | 74<br>(85.06) | 13<br>(14.94) | 85<br>(100)   | 68<br>(83.95) | 13<br>(16.05) | 51<br>(57.95) | 1<br>(1.14)   | 36<br>(40.91) | 49<br>(55.68) | 4<br>(4.55)   | 35<br>(39.77) | 32<br>(36.36) | 56<br>(63.64) | 3<br>(3.41)  | 5<br>(5.68)   | 80<br>(90.91) | 23<br>(26.44) | 10<br>(11.49) | 54<br>(61.07) | 29<br>(32.95) | 13<br>(14.77) | 46<br>(52.27) |
|       | Collection bag        | 1<br>(100)  | 1<br>(100)    | 1<br>(100)    |              |               | 1<br>(100)    |               | 1<br>(100)    | 1<br>(100)    |               | 1<br>(100)    |               |               | 1<br>(100)    |               |               | 1<br>(100)    |               | 1<br>(100)   |               |               | 1<br>(100)    |               |               | 1<br>(100)    |               |               |
|       | Nephrostomy catheter  | 22<br>(100) | 22<br>(100)   | 19<br>(86.36) |              | 3<br>(13.64)  | 20<br>(90.91) | 2<br>(9.09)   | 21<br>(100)   | 20<br>(95.24) | 1<br>(4.76)   | 16<br>(72.73) | 1<br>(4.55)   | 5<br>(22.73)  | 16<br>(72.73) |               | 6<br>(27.27)  | 9<br>(40.91)  | 13<br>(59.09) | 2<br>(9.09)  | 2<br>(9.09)   | 18<br>(81.82) | 7<br>(31.82)  | 3<br>(13.64)  | 12<br>(54.55) | 10<br>(45.45) | 3<br>(13.64)  | 9<br>(40.91)  |
|       | Clean catch midstream | 49<br>(100) | 49<br>(100)   | 27<br>(58.69) | 4<br>(8.69)  | 15<br>(32.61) | 41<br>(83.67) | 8<br>(16.33)  | 48<br>(100)   | 38<br>(86.36) | 6<br>(13.64)  | 26<br>(53.05) |               | 23<br>(46.94) | 24<br>(48.98) | 4<br>(8.16)   | 21<br>(42.86) | 18<br>(36.73) | 31<br>(63.27) | 1<br>(2.04)  | 2<br>(4.08)   | 46<br>(93.88) | 12<br>(25)    | 5<br>(10.42)  | 31<br>(64.58) | 14<br>(28.57) | 8<br>(16.33)  | 27<br>(55.1)  |
|       | Urinary catheter      | 16<br>(100) | 16<br>(100)   | 11<br>(73.33) | 1<br>(6.67)  | 3<br>(20)     | 13<br>(86.67) | 2<br>(13.33)  | 15<br>(100)   | 10<br>(66.67) | 5<br>(33.33)  | 9<br>(56.25)  |               | 7<br>(43.75)  | 9<br>(56.25)  |               | 7<br>(43.75)  | 5<br>(31.25)  | 11<br>(68.75) | 1<br>(6.25)  | 15<br>(93.75) | 4<br>(25)     | 2<br>(12.5)   | 10<br>(62.5)  | 5<br>(31.25)  | 2<br>(12.5)   | 9<br>(56.25)  |               |
|       | Children              | 3<br>(100)  | 3<br>(100)    | 2<br>(66.67)  |              | 1<br>(33.33)  | 3<br>(100)    |               | 3<br>(100)    | 3<br>(100)    |               | 2<br>(66.67)  |               | 1<br>(33.33)  | 2<br>(66.67)  |               | 1<br>(33.33)  | 2<br>(33.33)  |               | 3<br>(100)   |               |               | 2<br>(66.67)  |               | 1<br>(33.33)  | 2<br>(66.67)  |               | 1<br>(33.33)  |
|       | Adults                | 33<br>(100) | 33<br>(100)   | 19<br>(63.33) | 4<br>(13.33) | 7<br>(23.33)  | 30<br>(90.91) | 3<br>(9.09)   | 31<br>(100)   | 25<br>(86.21) | 4<br>(13.79)  | 17<br>(51.52) |               | 16<br>(48.48) | 16<br>(48.48) | 1<br>(3.03)   | 16<br>(48.48) | 15<br>(45.45) | 18<br>(54.55) | 2<br>(6.06)  | 4<br>(12.12)  | 27<br>(81.82) | 10<br>(31.25) | 4<br>(12.5)   | 18<br>(56.25) | 14<br>(42.42) | 2<br>(6.06)   | 17<br>(51.52) |
|       | Elderly               | 52<br>(100) | 52<br>(100)   | 37<br>(72.55) | 1<br>(1.96)  | 13<br>(25.49) | 41<br>(80.39) | 10<br>(19.61) | 51<br>(100)   | 40<br>(81.63) | 9<br>(18.37)  | 32<br>(61.54) | 1<br>(1.92)   | 19<br>(36.54) | 31<br>(59.62) | 3<br>(5.77)   | 18<br>(34.62) | 16<br>(30.77) | 36<br>(69.23) | 1<br>(1.92)  | 1<br>(1.92)   | 50<br>(96.15) | 11<br>(21.15) | 6<br>(11.54)  | 35<br>(67.31) | 13<br>(25)    | 11<br>(21.15) | 28<br>(53.85) |
|       | Outpatient            | 32<br>(100) | 32<br>(100)   | 16<br>(53.33) | 1<br>(3.33)  | 13<br>(43.33) | 23<br>(71.88) | 9<br>(28.13)  | 32<br>(100)   | 22<br>(78.57) | 6<br>(21.43)  | 13<br>(40.63) | 1<br>(3.13)   | 18<br>(56.25) | 12<br>(37.5)  | 2<br>(6.25)   | 18<br>(56.25) | 7<br>(21.88)  | 25<br>(78.13) |              | 1<br>(3.13)   | 31<br>(96.88) | 4<br>(12.9)   | 5<br>(16.13)  | 22<br>(70.97) | 8<br>(25)     | 3<br>(9.38)   | 21<br>(65.63) |
|       | Inpatient             | 56<br>(100) | 56<br>(100)   | 42<br>(77.78) | 4<br>(7.41)  | 8<br>(14.81)  | 51<br>(92.73) | 4<br>(7.27)   | 53<br>(100)   | 46<br>(86.79) | 7<br>(13.21)  | 38<br>(67.86) |               | 18<br>(32.14) | 37<br>(66.07) | 2<br>(3.57)   | 17<br>(30.36) | 25<br>(44.64) | 31<br>(55.36) | 3<br>(5.36)  | 4<br>(7.14)   | 49<br>(87.5)  | 19<br>(33.93) | 5<br>(8.93)   | 32<br>(57.14) | 21<br>(37.5)  | 10<br>(17.86) | 25<br>(44.64) |
| Men   | 52<br>(100)           | 52<br>(100) | 31<br>(62)    | 4<br>(8)      | 15<br>(30)   | 44<br>(84.62) | 8<br>(15.38)  | 50<br>(100)   | 41<br>(83.67) | 8<br>(16.33)  | 26<br>(50)    | 1<br>(1.92)   | 25<br>(48.08) | 25<br>(48.08) | 2<br>(3.85)   | 25<br>(48.08) | 14<br>(26.92) | 38<br>(73.08) | 1<br>(1.92)   | 3<br>(5.77)  | 48<br>(92.31) | 8<br>(15.69)  | 6<br>(11.76)  | 37<br>(72.55) | 12<br>(23.08) | 6<br>(11.54)  | 34<br>(65.38) |               |
| Women | 36<br>(100)           | 36<br>(100) | 27<br>(79.41) | 1<br>(2.94)   | 6<br>(17.65) | 30<br>(85.71) | 5<br>(14.29)  | 35<br>(100)   | 27<br>(84.38) | 5<br>(15.63)  | 25<br>(69.44) |               | 11<br>(30.56) | 24<br>(66.67) | 2<br>(5.56)   | 10<br>(27.78) | 18<br>(50)    | 18<br>(50)    | 2<br>(5.56)   | 2<br>(5.56)  | 32<br>(88.89) | 15<br>(41.67) | 4<br>(11.11)  | 17<br>(47.22) | 17<br>(47.22) | 7<br>(19.44)  | 12<br>(33.33) |               |

AMC= Amoxicillin-clavulanic acid; AMP=Ampicillin TIC= ticarcillin CXM=Cefuroxime FOX=Cefoxitin CFM= Cefixime CTX=Cefotaxime CAZ=Ceftazidime FEP=Cefepime IPM=Imipenem ETP=Ertapenem TZP=Piperacillin-tazobactam.

Table S9: Resistances to beta-lactams (%) of *Enterobacter cloacae* in 2021.

|                           | AMC         | AMP         | TIC           |              |              | CXM           |              | CFM         | CEF           |              | CTX           |              |               | CAZ           |              |               | FEP           |               | IPM          |               | ETP           |              |               | S             | TZP          |               |
|---------------------------|-------------|-------------|---------------|--------------|--------------|---------------|--------------|-------------|---------------|--------------|---------------|--------------|---------------|---------------|--------------|---------------|---------------|---------------|--------------|---------------|---------------|--------------|---------------|---------------|--------------|---------------|
|                           | R           | R           | R             | I            | S            | R             | S            | R           | R             | S            | R             | I            | S             | R             | I            | S             | R             | S             | R            | S             | R             | I            | S             |               | I            | S             |
| Total                     | 37<br>(100) | 37<br>(100) | 27<br>(72.97) | 1<br>(2.7)   | 9<br>(24.32) | 32<br>(86.49) | 5<br>(13.51) | 36<br>(100) | 36<br>(97.29) | 1<br>(2.7)   | 23<br>(62.16) | 4<br>(10.81) | 10<br>(27.03) | 22<br>(59.46) | 2<br>(5.41)  | 13<br>(35.14) | 21<br>(56.76) | 16<br>(43.24) | 2<br>(5.41)  | 35<br>(94.59) | 14<br>(37.84) | 3<br>(8.11)  | 20<br>(54.05) | 16<br>(43.24) | 2<br>(5.41)  | 19<br>(51.35) |
| Collection bag            | 1<br>(100)  | 1<br>(100)  |               |              | 1<br>(100)   | 1<br>(100)    |              | 1<br>(100)  | 1<br>(100)    |              |               |              | 1<br>(100)    |               |              | 1<br>(100)    |               |               | 1<br>(100)   |               |               |              | 1<br>(100)    |               |              | 1<br>(100)    |
| Permanent catheterization | 7<br>(100)  | 7<br>(100)  | 5<br>(71.43)  | 1<br>(14.29) | 1<br>(14.29) | 6<br>(85.71)  | 1<br>(14.29) | 7<br>(100)  | 7<br>(100)    |              | 4<br>(57.14)  | 1<br>(14.29) | 2<br>(28.57)  | 4<br>(57.14)  |              | 3<br>(42.86)  | 4<br>(57.14)  | 3<br>(42.86)  |              | 7<br>(100)    | 3<br>(42.86)  |              | 4<br>(57.14)  | 2<br>(28.57)  |              | 5<br>(71.43)  |
| Clean catch midstream     | 13<br>(100) | 13<br>(100) | 8<br>(61.54)  |              | 5<br>(38.46) | 9<br>(69.23)  | 4<br>(30.77) | 12<br>(100) | 12<br>(92.31) | 1<br>(7.69)  | 6<br>(46.15)  | 2<br>(15.28) | 5<br>(38.46)  | 6<br>(46.15)  | 1<br>(7.69)  | 6<br>(46.15)  | 5<br>(38.46)  | 8<br>(61.54)  | 1<br>(7.69)  | 12<br>(92.31) | 2<br>(15.38)  | 1<br>(7.69)  | 10<br>(76.92) | 5<br>(38.46)  | 1<br>(7.69)  | 7<br>(53.85)  |
| Urinary catheter          | 16<br>(100) | 16<br>(100) | 14<br>(87.5)  |              | 2<br>(12.5)  | 16<br>(100)   |              | 16<br>(100) | 16<br>(100)   |              | 13<br>(81.25) | 1<br>(6.25)  | 2<br>(12.5)   | 12<br>(75)    | 1<br>(6.25)  | 3<br>(18.75)  | 12<br>(75)    | 4<br>(25)     | 1<br>(6.25)  | 15<br>(93.75) | 9<br>(56.25)  | 2<br>(12.5)  | 5<br>(31.25)  | 9<br>(56.25)  | 1<br>(6.25)  | 6<br>(37.5)   |
| Children                  | 3<br>(100)  | 3<br>(100)  |               |              | 3<br>(100)   | 3<br>(100)    |              | 3<br>(100)  | 3<br>(100)    |              |               |              | 3<br>(100)    |               |              | 3<br>(100)    |               |               | 3<br>(100)   |               |               |              | 3<br>(100)    |               |              | 3<br>(100)    |
| Adults                    | 24<br>(100) | 24<br>(100) | 21<br>(87.5)  |              | 3<br>(12.5)  | 22<br>(91.67) | 2<br>(8.33)  | 23<br>(100) | 23<br>(95.83) | 1<br>(4.17)  | 19<br>(79.17) | 2<br>(8.33)  | 3<br>(12.5)   | 18<br>(75)    | 1<br>(4.17)  | 5<br>(20.83)  | 19<br>(79.17) | 5<br>(20.83)  | 1<br>(4.17)  | 23<br>(95.83) | 11<br>(45.83) | 3<br>(12.5)  | 10<br>(41.67) | 13<br>(54.17) | 2<br>(8.33)  | 9<br>(37.5)   |
| Elderly                   | 10<br>(100) | 10<br>(100) | 6<br>(60)     | 1<br>(10)    | 3<br>(30)    | 7<br>(70)     | 3<br>(30)    | 10<br>(100) | 10<br>(100)   |              | 4<br>(40)     | 2<br>(20)    | 4<br>(40)     | 4<br>(40)     | 1<br>(10)    | 5<br>(50)     | 2<br>(20)     | 8<br>(80)     | 1<br>(10)    | 9<br>(90)     | 3<br>(30)     |              | 7<br>(70)     | 3<br>(30)     |              | 7<br>(70)     |
| Outpatient                | 6<br>(100)  | 6<br>(100)  | 2<br>(33.33)  |              | 4<br>(66.67) | 4<br>(66.67)  | 2<br>(33.33) | 5<br>(100)  | 5<br>(83.33)  | 1<br>(16.67) | 1<br>(16.67)  | 1<br>(16.67) | 4<br>(66.67)  | 1<br>(16.67)  | 1<br>(16.67) | 4<br>(66.67)  |               | 6<br>(100)    | 1<br>(16.67) | 5<br>(83.33)  | 1<br>(16.67)  |              | 5<br>(83.33)  | 1<br>(16.67)  |              | 5<br>(83.33)  |
| Inpatient                 | 31<br>(100) | 31<br>(100) | 25<br>(80.65) | 1<br>(3.23)  | 5<br>(16.13) | 28<br>(90.32) | 3<br>(9.68)  | 31<br>(100) | 31<br>(100)   |              | 22<br>(70.97) | 3<br>(9.68)  | 6<br>(19.35)  | 21<br>(67.74) | 1<br>(3.23)  | 9<br>(29.03)  | 21<br>(67.74) | 10<br>(32.26) | 1<br>(3.23)  | 30<br>(96.77) | 13<br>(41.94) | 3<br>(9.68)  | 15<br>(48.39) | 15<br>(48.39) | 2<br>(6.45)  | 14<br>(45.16) |
| Men                       | 23<br>(100) | 23<br>(100) | 17<br>(73.91) |              | 6<br>(26.09) | 20<br>(86.96) | 3<br>(13.04) | 23<br>(100) | 23<br>(100)   |              | 13<br>(56.52) | 4<br>(17.39) | 6<br>(26.09)  | 12<br>(52.18) | 2<br>(8.69)  | 9<br>(39.13)  | 12<br>(52.17) | 11<br>(47.83) | 2<br>(8.69)  | 21<br>(91.3)  | 10<br>(43.48) | 1<br>(4.35)  | 12<br>(52.17) | 9<br>(39.13)  |              | 14<br>(60.87) |
| Women                     | 14<br>(100) | 14<br>(100) | 10<br>(71.43) | 1<br>(7.14)  | 3<br>(21.43) | 12<br>(85.71) | 2<br>(14.29) | 13<br>(100) | 13<br>(92.86) | 1<br>(7.14)  | 10<br>(71.43) |              | 4<br>(28.57)  | 10<br>(71.43) |              | 4<br>(28.57)  | 9<br>(64.29)  | 5<br>(35.71)  |              | 14<br>(100)   | 4<br>(28.57)  | 2<br>(14.29) | 8<br>(57.14)  | 7<br>(50)     | 2<br>(14.29) | 5<br>(35.72)  |

AMC= Amoxicillin-clavulanic acid; AMP=Ampicillin TIC= ticarcillin CXM=Cefuroxime FOX=Cefoxitin CFM= Cefixime CTX=Cefotaxime CAZ=Ceftazidime FEP=Cefepime IPM=Imipenem ETP=Ertapenem TZP=Piperacillin-tazobactam.



Table S10: Resistances to non-beta-lactams (%) of *Enterobacter cloacae* in 2016.

|      |                           | TOB          |              |               | GEN          |             |               | NAL        |   | CIP          |             |               | FOF          |               | NIT           |              |               | SXT          |               |
|------|---------------------------|--------------|--------------|---------------|--------------|-------------|---------------|------------|---|--------------|-------------|---------------|--------------|---------------|---------------|--------------|---------------|--------------|---------------|
|      |                           | R            | I            | S             | R            | I           | S             | R          | S | R            | I           | S             | R            | S             | R             | I            | S             | R            | S             |
| 2016 | Total                     | 3<br>(6)     | 4<br>(8)     | 43<br>(86)    | 5<br>(10)    | 1<br>(2)    | 44<br>(88)    | 1<br>(100) |   | 1<br>(2)     | 9<br>(18)   | 40<br>(80)    | 14<br>(28)   | 36<br>(72)    | 18<br>(36)    | 16<br>(32)   | 16<br>(32)    | 12<br>(24)   | 38<br>(76)    |
|      | Collection bag            |              |              | 3<br>(100)    |              |             | 3<br>(100)    |            |   |              |             | 3<br>(100)    | 1<br>(33.33) | 2<br>(66.67)  |               | 2<br>(66.67) | 1<br>(33.33)  |              | 3<br>(100)    |
|      | Nephrostomy catheter      |              |              | 4<br>(100)    |              |             | 4<br>(100)    | 1<br>(100) |   |              |             | 4<br>(100)    |              | 4<br>(100)    | 2<br>(50)     | 2<br>(50)    |               |              | 4<br>(100)    |
|      | Permanent catheterization |              | 1<br>(14.29) | 6<br>(85.71)  | 1<br>(14.29) |             | 6<br>(85.71)  |            |   | 3<br>(42.86) |             | 4<br>(57.14)  | 4<br>(57.14) | 3<br>(42.86)  | 5<br>(71.43)  |              | 2<br>(28.57)  | 2<br>(28.57) | 5<br>(71.43)  |
|      | Clean catch midstream     | 1<br>(4.35)  | 2<br>(8.69)  | 20<br>(86.96) | 1<br>(4.35)  | 1<br>(4.35) | 21<br>(91.3)  |            |   | 3<br>(13.04) |             | 20<br>(86.96) | 4<br>(17.39) | 19<br>(82.61) | 8<br>(34.78)  | 7<br>(30.43) | 8<br>(34.78)  | 6<br>(26.09) | 17<br>(73.19) |
|      | Urinary catheter          | 2<br>(15.38) | 1<br>(7.69)  | 10<br>(76.92) | 3<br>(23.08) |             | 10<br>(76.92) |            |   | 3<br>(23.08) | 1<br>(7.69) | 9<br>(69.23)  | 5<br>(38.46) | 8<br>(61.54)  | 3<br>(23.08)  | 5<br>(38.46) | 5<br>(38.46)  | 4<br>(30.77) | 9<br>(69.23)  |
|      | Children                  |              |              | 5<br>(100)    |              |             | 5<br>(100)    |            |   |              |             | 5<br>(100)    | 1<br>(20)    | 4<br>(80)     | 1<br>(20)     | 2<br>(40)    | 2<br>(40)     | 1<br>(20)    | 4<br>(80)     |
|      | Adults                    | 2<br>(8.33)  | 4<br>(16.67) | 18<br>(75%)   | 4<br>(16.67) | 1<br>(4.17) | 19<br>(79.17) |            |   | 4<br>(16.67) | 1<br>(4.17) | 19<br>(79.16) | 6<br>(25)    | 18<br>(75)    | 10<br>(41.67) | 7<br>(29.17) | 7<br>(29.17)  | 7<br>(29.17) | 17<br>(70.83) |
|      | Elderly                   | 1<br>(4.76)  |              | 20<br>(95.24) | 1<br>(4.76)  |             | 20<br>(95.24) | 1<br>(100) |   | 5<br>(23.81) |             | 16<br>(76.19) | 7<br>(33.33) | 14<br>(66.67) | 7<br>(33.33)  | 7<br>(33.33) | 7<br>(33.33)  | 4<br>(19.05) | 17<br>(80.95) |
|      | Outpatient                | 1<br>(3.13)  | 2<br>(6.25)  | 29<br>(90.63) | 1<br>(3.13)  | 1<br>(3.13) | 30<br>(93.75) | 1<br>(100) |   | 5<br>(15.63) |             | 27<br>(84.38) | 9<br>(28.13) | 23<br>(71.88) | 11<br>(34.38) | 7<br>(21.88) | 14<br>(43.75) | 7<br>(21.88) | 25<br>(78.13) |
|      | Inpatient                 | 2<br>(11.11) | 2<br>(11.11) | 14<br>(77.78) | 4<br>(22.22) |             | 14<br>(77.78) |            |   | 4<br>(22.22) | 1<br>(5.56) | 13<br>(72.22) | 5<br>(27.78) | 13<br>(72.22) | 7<br>(38.89)  | 9<br>(50)    | 2<br>(11.11)  | 5<br>(27.78) | 13<br>(72.22) |
|      | Men                       | 2<br>(6.06)  | 1<br>(3.03)  | 30<br>(90.91) | 2<br>(6.06)  | 1<br>(3.03) | 30<br>(90.91) |            |   | 7<br>(21.21) |             | 26<br>(78.79) | 7<br>(21.21) | 26<br>(78.79) | 11<br>(33.33) | 10<br>(30.3) | 12<br>(36.36) | 8<br>(24.24) | 25<br>(75.76) |
|      | Women                     | 1<br>(5.88)  | 3<br>(17.65) | 13<br>(76.47) | 3<br>(17.65) |             | 14<br>(82.35) | 1<br>(100) |   | 2<br>(11.76) | 1<br>(5.88) | 14<br>(82.35) | 7<br>(41.18) | 10<br>(58.82) | 7<br>(41.18)  | 6<br>(35.29) | 4<br>(23.52)  | 4<br>(23.53) | 13<br>(76.47) |

TOB=Tobramycin GEN=Gentamicin NAL=Nalidixic acid CIP=Ciprofloxacin FOF=Fosfomycin NIT= Nitrofurantoin SXT= Trimethoprim-sulfamethoxazole

Table S11: Resistances to non-beta-lactams (%) of *Enterobacter cloacae* in 2017.

|      |                           | AMK |       | TOB     |        |         | GEN     |         | NAL     |         | CIP     |         | FOF     |         | NIT     |         |         | SXT     |         |
|------|---------------------------|-----|-------|---------|--------|---------|---------|---------|---------|---------|---------|---------|---------|---------|---------|---------|---------|---------|---------|
|      |                           | R   | S     | R       | I      | S       | R       | S       | R       | S       | R       | S       | R       | S       | R       | I       | S       | R       | S       |
| 2017 | Total                     | 2   | (100) | 8       | 2      | 64      | 9       | 65      | 4       | 7       | 12      | 62      | 29      | 44      | 15      | 37      | 21      | 22      | 52      |
|      | Collection bag            |     |       | 3       |        | 3       | 3       | 3       |         |         | 6       | (100)   | 1       | 5       | 1       | 2       | 3       | 3       | 3       |
|      | Nephrostomy catheter      |     |       |         |        | (50)    | (50)    | (50)    |         |         |         |         | (16.67) | (83.33) | (16.67) | (33.33) | (50)    | (50)    | (50)    |
|      | Permanent catheterization |     |       | 1       |        | 14      | 1       | 14      | 4       | 1       | 6       | 9       | 4       | 11      | 6       | 9       |         | 6       | 9       |
|      | Clean catch midstream     | 1   | (100) |         | 1      | 28      | 1       | 28      |         | 5       | 3       | 26      | 13      | 15      | 5       | 15      | 8       | 5       | 24      |
|      | Urinary catheter          | 1   | (100) | 4       | 1      | 19      | 4       | 20      |         | 1       | 3       | 21      | 11      | 13      | 3       | 11      | 10      | 8       | 16      |
|      |                           |     |       | (16.67) | (4.17) | (79.17) | (16.67) | (83.33) |         | (100)   | (12.5)  | (87.5)  | (45.83) | (54.17) | (12.5)  | (45.83) | (41.67) | (33.33) | (66.67) |
|      | Children                  |     |       | 5       |        | 6       | 5       | 6       |         |         | 11      | (100)   | 2       | 9       |         | 8       | 3       | 5       | 6       |
|      | Adults                    |     |       | (45.45) |        | (54.55) | (45.45) | (54.55) |         |         |         |         | (18.18) | (81.81) |         | (72.73) | (27.27) | (45.45) | (54.55) |
|      | Elderly                   | 1   | (100) | 1       | 1      | 20      | 2       | 20      | 1       | 2       | 4       | 18      | 9       | 13      | 3       | 12      | 7       | 8       | 14      |
|      |                           |     |       | (4.55)  | (4.55) | (90.91) | (9.09)  | (90.91) | (33.33) | (66.67) | (18.18) | (81.82) | (40.91) | (59.09) | (13.64) | (54.55) | (31.82) | (36.36) | (63.64) |
|      | Outpatient                | 2   | (100) | 2       | 1      | 38      | 2       | 39      | 3       | 5       | 8       | 33      | 18      | 22      | 12      | 17      | 11      | 9       | 32      |
|      |                           |     |       | (4.88)  | (2.44) | (92.68) | (4.88)  | (95.12) | (37.5)  | (62.5)  | (19.51) | (80.49) | (45)    | (55)    | (30)    | (42.5)  | (27.5)  | (21.95) | (78.05) |
|      | Inpatient                 | 1   | (100) | 3       | 1      | 28      | 4       | 28      | 1       | 7       | 7       | 25      | 12      | 20      | 7       | 17      | 8       | 9       | 23      |
|      |                           |     |       | (9.38)  | (3.3)  | (87.5)  | (12.5)  | (87.5)  | (12.5)  | (87.5)  | (21.88) | (78.13) | (37.5)  | (62.5)  | (21.88) | (53.13) | (25)    | (28.13) | (71.88) |
|      | Men                       | 1   | (100) | 4       | 1      | 42      | 5       | 42      | 2       | 3       | 6       | 41      | 16      | 30      | 12      | 26      | 8       | 13      | 34      |
|      | Women                     | 1   | (100) | 4       | 1      | 22      | 4       | 23      | 2       | 4       | 6       | 21      | 13      | 14      | 3       | 11      | 13      | 9       | 18      |
|      |                           |     |       | (14.81) | (3.7)  | (81.48) | (14.81) | (85.19) | (33.33) | (66.67) | (22.22) | (77.78) | (48.15) | (51.85) | (11.11) | (40.74) | (48.15) | (33.33) | (66.67) |

AMK= Amikacin TOB=Tobramycin GEN=Gentamicin NAL=Nalidixic acid CIP=Ciprofloxacin FOF=Fosfomicin NIT= Nitrofurantoin SXT= Trimethoprim-sulfamethoxazole

Table S12: Resistances to non-beta-lactams (%) of *Enterobacter cloacae* in 2018.

|      |                           | AMK        | TOB          |              |               | GEN          |               | NAL           |               | CIP           |               | LVX        | FOF           |               | NIT          |               |               | SXT           |               |
|------|---------------------------|------------|--------------|--------------|---------------|--------------|---------------|---------------|---------------|---------------|---------------|------------|---------------|---------------|--------------|---------------|---------------|---------------|---------------|
|      |                           | R S        | R            | I            | S             | R            | S             | R             | S             | R             | S             | R S        | R             | S             | R            | I             | S             | R             | S             |
| 2018 | Total                     | 2<br>(100) | 5<br>(7.35)  | 3<br>(4.41)  | 60<br>(88.24) | 5<br>(7.35)  | 63<br>(92.95) | 11<br>(16.42) | 56<br>(83.58) | 10<br>(14.71) | 58<br>(85.29) | 1<br>(100) | 25<br>(37.31) | 42<br>(62.69) | 13<br>(19.4) | 33<br>(49.25) | 21<br>(31.34) | 11<br>(16.18) | 57<br>(83.82) |
|      | Collection bag            |            |              |              | 1<br>(100)    |              | 1<br>(100)    |               | 1<br>(100)    |               | 1<br>(100)    |            |               | 1<br>(100)    |              | 1<br>(100)    |               | 1<br>(100)    |               |
|      | Nephrostomy catheter      |            |              |              | 2<br>(100)    |              | 2<br>(100)    |               | 2<br>(100)    |               | 2<br>(100)    |            | 1<br>(50)     | 1<br>(50)     |              | 1<br>(50)     | 1<br>(50)     |               | 2<br>(100)    |
|      | Permanent catheterization | 1<br>(100) | 1<br>(5.88)  | 2<br>(11.76) | 14<br>(82.35) | 1<br>(5.88)  | 16<br>(94.12) | 5<br>(29.41)  | 12<br>(70.59) | 5<br>(29.41)  | 12<br>(70.59) |            | 7<br>(41.18)  | 10<br>(58.82) | 3<br>(17.65) | 7<br>(41.18)  | 7<br>(41.18)  | 3<br>(17.65)  | 14<br>(82.35) |
|      | Clean catch midstream     | 1<br>(100) | 1<br>(2.94)  | 1<br>(2.94)  | 32<br>(94.12) | 1<br>(2.94)  | 33<br>(97.06) | 4<br>(12.12)  | 29<br>(87.88) | 3<br>(8.82)   | 31<br>(91.18) | 1<br>(100) | 14<br>(42.42) | 19<br>(57.58) | 6<br>(18.18) | 21<br>(63.64) | 6<br>(18.18)  | 5<br>(14.71)  | 29<br>(85.29) |
|      | Urinary catheter          |            | 3<br>(21.43) |              | 11<br>(78.57) | 3<br>(21.43) | 11<br>(78.57) | 2<br>(14.29)  | 12<br>(85.71) | 2<br>(14.29)  | 12<br>(85.71) |            | 3<br>(21.43)  | 11<br>(78.57) | 4<br>(28.57) | 3<br>(21.43)  | 7<br>(50)     | 3<br>(21.43)  | 11<br>(78.57) |
|      | Children                  |            | 3<br>(30)    |              | 7<br>(70)     | 3<br>(30)    | 7<br>(70)     | 1<br>(11.11)  | 8<br>(88.89)  | 2<br>(20)     | 8<br>(80)     |            | 3<br>(30)     | 7<br>(70)     | 3<br>(30)    | 3<br>(30)     | 4<br>(40)     | 3<br>(30)     | 7<br>(70)     |
|      | Adults                    | 2<br>(100) |              | 2<br>(10)    | 18<br>(90)    |              | 20<br>(100)   | 4<br>(20)     | 16<br>(80)    | 2<br>(10)     | 18<br>(90)    | 1<br>(100) | 11<br>(57.89) | 8<br>(42.11)  | 1<br>(5.26)  | 12<br>(63.16) | 6<br>(31.58)  | 2<br>(10)     | 18<br>(90)    |
|      | Elderly                   |            | 2<br>(5.26)  | 1<br>(2.63)  | 35<br>(92.11) | 2<br>(5.26)  | 36<br>(94.74) | 6<br>(15.79)  | 32<br>(84.21) | 6<br>(15.79)  | 32<br>(84.21) |            | 11<br>(28.95) | 27<br>(71.05) | 9<br>(23.68) | 18<br>(47.37) | 11<br>(28.95) | 6<br>(15.79)  | 32<br>(84.21) |
|      | Outpatient                |            | 2<br>(5.71)  | 1<br>(2.86)  | 32<br>(91.43) | 2<br>(5.71)  | 33<br>(94.29) | 6<br>(17.14)  | 29<br>(82.86) | 5<br>(14.29)  | 30<br>(85.71) |            | 12<br>(34.29) | 23<br>(65.71) | 8<br>(22.86) | 14<br>(40)    | 13<br>(37.14) | 5<br>(14.29)  | 30<br>(85.71) |
|      | Inpatient                 | 2<br>(100) | 3<br>(9.09)  | 2<br>(6.06)  | 28<br>(84.85) | 3<br>(9.09)  | 30<br>(90.91) | 5<br>(15.63)  | 27<br>(84.38) | 5<br>(15.15)  | 28<br>(84.85) | 1<br>(100) | 13<br>(40.63) | 19<br>(59.38) | 5<br>(15.63) | 19<br>(59.38) | 8<br>(25)     | 6<br>(18.18)  | 27<br>(81.82) |
|      | Men                       | 2<br>(100) | 2<br>(4.88)  | 2<br>(4.88)  | 37<br>(90.24) | 2<br>(4.88)  | 39<br>(95.12) | 5<br>(12.5)   | 35<br>(87.5)  | 6<br>(14.63)  | 35<br>(85.37) | 1<br>(100) | 14<br>(35)    | 26<br>(65)    | 9<br>(22.5)  | 18<br>(45)    | 13<br>(32.5)  | 6<br>(14.63)  | 35<br>(85.37) |
|      | Women                     |            | 3<br>(11.11) | 1<br>(3.7)   | 23<br>(85.19) | 3<br>(11.11) | 24<br>(88.89) | 6<br>(22.22)  | 21<br>(77.78) | 4<br>(14.81)  | 23<br>(85.19) |            | 11<br>(40.74) | 16<br>(59.26) | 4<br>(14.81) | 15<br>(55.56) | 8<br>(29.63)  | 5<br>(18.52)  | 22<br>(81.48) |

AMK= Amikacin TOB=Tobramycin GEN=Gentamicin NAL=Nalidixic acid CIP=Ciprofloxacin FOF=Fosfomycin NIT= Nitrofurantoin SXT= Trimethoprim-sulfamethoxazole

Table S13: Resistances to non-beta-lactams (%) of *Enterobacter cloacae* in 2019.

|      |                           | AMK         |               | TOB           |             |               | GEN          |             |               | NAL           |               | CIP           |             |               | LVX          |             |               | FOF           |               | NIT           |              |               | SXT           |               | CST          |               |
|------|---------------------------|-------------|---------------|---------------|-------------|---------------|--------------|-------------|---------------|---------------|---------------|---------------|-------------|---------------|--------------|-------------|---------------|---------------|---------------|---------------|--------------|---------------|---------------|---------------|--------------|---------------|
|      |                           | R           | S             | R             | I           | S             | R            | I           | S             | R             | S             | R             | I           | S             | R            | I           | S             | R             | S             | R             | I            | S             | R             | S             | R            | S             |
| 2019 | Total                     | 2<br>(2.74) | 71<br>(97.26) | 10<br>(11.36) | 3<br>(3.41) | 75<br>(85.23) | 7<br>(79.55) | 1<br>(1.14) | 80<br>(90.91) | 13<br>(14.94) | 74<br>(85.06) | 13<br>(14.94) | 5<br>(5.75) | 69<br>(79.31) | 9<br>(12.33) | 1<br>(1.34) | 63<br>(86.3)  | 30<br>(34.09) | 58<br>(65.91) | 23<br>(34.85) | 7<br>(10.61) | 36<br>(54.55) | 15<br>(17.05) | 73<br>(82.95) | 2<br>(6.89)  | 27<br>(93.1)  |
|      | Collection bag            |             | 1<br>(100)    |               |             | 1<br>(100)    |              |             | 1<br>(100)    |               | 1<br>(100)    |               |             | 1<br>(100)    |              |             | 1<br>(100)    |               |               |               |              | 1<br>(100)    |               | 1<br>(100)    |              |               |
|      | Nephrostomy catheter      |             | 3<br>(100)    |               |             | 4<br>(100)    |              |             | 4<br>(100)    | 2<br>(50)     | 2<br>(50)     | 1<br>(25)     |             | 3<br>(75)     |              |             | 3<br>(100)    | 1<br>(25)     | 3<br>(75)     | 1<br>(100)    |              |               | 1<br>(25)     | 3<br>(75)     |              |               |
|      | Permanent catheterization | 1<br>(6.67) | 14<br>(83.33) | 4<br>(23.53)  |             | 13<br>(76.47) | 2<br>(11.76) | 1<br>(5.88) | 14<br>(82.35) | 4<br>(23.53)  | 13<br>(76.47) | 4<br>(25)     | 1<br>(6.25) | 11<br>(68.75) | 3<br>(20)    |             | 12<br>(80)    | 5<br>(29.41)  | 12<br>(70.59) | 5<br>(29.41)  |              | 12<br>(70.59) | 4<br>(23.53)  | 14<br>(82.35) | 1<br>(16.67) | 5<br>(83.33)  |
|      | Clean catch midstream     |             | 35<br>(100)   | 5<br>(11.11)  | 1<br>(2.22) | 39<br>(86.67) | 4<br>(8.89)  |             | 41<br>(91.11) | 4<br>(9.09)   | 40<br>(90.91) | 6<br>(13.33)  | 2<br>(4.44) | 37<br>(82.22) | 4<br>(11.43) | 1<br>(2.86) | 30<br>(85.71) | 16<br>(35.56) | 29<br>(64.44) | 17<br>(37.78) | 6<br>(13.33) | 22<br>(48.89) | 8<br>(17.78)  | 37<br>(82.22) | 1<br>(6.25)  | 15<br>(93.75) |
|      | Urinary catheter          | 1<br>(5.26) | 18<br>(94.74) | 1<br>(4.76)   | 2<br>(9.52) | 18<br>(85.71) | 1<br>(4.76)  |             | 20<br>(95.24) | 3<br>(14.29)  | 18<br>(85.71) | 2<br>(9.52)   | 2<br>(9.52) | 17<br>(80.95) | 2<br>(10.53) |             | 17<br>(89.47) | 8<br>(38.09)  | 13<br>(61.9)  |               | 1<br>(50)    | 1<br>(50)     | 2<br>(9.52)   | 19<br>(90.48) |              | 7<br>(100)    |
|      | Children                  |             | 3<br>(100)    |               |             | 5<br>(100)    |              |             | 5<br>(100)    |               | 5<br>(100)    |               |             | 5<br>(100)    |              |             | 3<br>(100)    |               | 5<br>(100)    |               | 2<br>(66.67) | 1<br>(33.33)  |               | 5<br>(100)    |              |               |
|      | Adults                    |             | 23<br>(100)   | 3<br>(10)     |             | 27<br>(90)    | 3<br>(10)    |             | 27<br>(90)    | 4<br>(13.33)  | 26<br>(86.67) | 4<br>(13.33)  | 3<br>(10)   | 23<br>(76.67) | 3<br>(13.04) |             | 20<br>(86.96) | 11<br>(36.67) | 19<br>(63.33) | 10<br>(38.46) | 2<br>(7.69)  | 14<br>(53.85) | 5<br>(16.67)  | 25<br>(83.33) | 1<br>(9.09)  | 10<br>(90.91) |
|      | Elderly                   | 2<br>(4.26) | 45<br>(95.74) | 7<br>(13.21)  | 3<br>(5.66) | 43<br>(81.13) | 4<br>(7.55)  | 1<br>(1.89) | 48<br>(90.57) | 9<br>(17.31)  | 43<br>(82.69) | 9<br>(17.31)  | 1<br>(3.85) | 41<br>(78.85) | 6<br>(12.77) | 1<br>(2.13) | 40<br>(85.11) | 19<br>(35.85) | 34<br>(64.15) | 13<br>(35.14) | 3<br>(8.11)  | 21<br>(56.76) | 10<br>(18.87) | 43<br>(81.13) | 1<br>(5.56)  | 17<br>(94.44) |
|      | Outpatient                | 1<br>(3.57) | 27<br>(96.43) | 4<br>(11.43)  | 2<br>(5.71) | 29<br>(82.86) | 3<br>(8.57)  |             | 32<br>(91.43) | 6<br>(17.65)  | 28<br>(82.35) | 7<br>(20)     | 1<br>(2.86) | 27<br>(77.14) | 4<br>(14.29) |             | 24<br>(85.71) | 11<br>(31.43) | 24<br>(68.57) | 8<br>(36.36)  | 3<br>(13.64) | 11<br>(50)    | 7<br>(20)     | 28<br>(80)    |              | 11<br>(100)   |
|      | Inpatient                 | 1<br>(2.22) | 44<br>(97.78) | 6<br>(11.32)  | 1<br>(1.89) | 46<br>(86.79) | 4<br>(7.55)  | 1<br>(1.89) | 48<br>(90.57) | 7<br>(13.21)  | 46<br>(86.79) | 6<br>(11.54)  | 4<br>(7.69) | 42<br>(80.77) | 5<br>(11.11) | 1<br>(2.22) | 39<br>(86.67) | 19<br>(35.85) | 34<br>(64.15) | 15<br>(34.09) | 4<br>(9.09)  | 25<br>(56.82) | 8<br>(15.09)  | 45<br>(84.91) | 2<br>(11.11) | 16<br>(88.89) |
|      | Men                       | 1<br>(2.22) | 44<br>(97.78) | 7<br>(12.5)   | 1<br>(1.79) | 48<br>(85.71) | 4<br>(7.14)  |             | 52<br>(92.86) | 9<br>(16.36)  | 46<br>(83.64) | 9<br>(16.36)  | 1<br>(1.82) | 45<br>(81.82) | 7<br>(15.56) |             | 38<br>(84.44) | 17<br>(30.36) | 39<br>(69.64) | 15<br>(34.09) | 5<br>(11.36) | 24<br>(54.55) | 9<br>(16.07)  | 47<br>(83.93) | 2<br>(11.11) | 16<br>(88.89) |
|      | Women                     | 1<br>(3.57) | 27<br>(96.43) | 3<br>(9.38)   | 2<br>(6.25) | 27<br>(84.38) | 3<br>(9.38)  | 1<br>(3.13) | 28<br>(87.5)  | 4<br>(12.5)   | 28<br>(87.5)  | 4<br>(12.5)   | 4<br>(12.5) | 24<br>(75)    | 2<br>(7.14)  | 1<br>(3.57) | 25<br>(89.29) | 13<br>(40.63) | 19<br>(59.38) | 8<br>(36.36)  | 2<br>(9.09)  | 12<br>(54.55) | 6<br>(18.75)  | 26<br>(81.25) |              | 11<br>(100)   |

AMK= Amikacin TOB=Tobramycin GEN=Gentamicin NAL=Nalidixic acid CIP=Ciprofloxacin FOF=Fosfomycin NIT= Nitrofurantoin SXT= Trimethoprim-sulfamethoxazole CST= Colistin

Table S14: Resistances to non-beta-lactams (%) of *Enterobacter cloacae* in 2020.

|      |                           | AMK         |             |               | TOB           |             |               | GEN          |             |               | NAL           |               | CIP           |             |               | LVX           |             |               | FOF           |               | NIT           |               | SXT           |               | CST           |               |
|------|---------------------------|-------------|-------------|---------------|---------------|-------------|---------------|--------------|-------------|---------------|---------------|---------------|---------------|-------------|---------------|---------------|-------------|---------------|---------------|---------------|---------------|---------------|---------------|---------------|---------------|---------------|
|      |                           | R           | I           | S             | R             | I           | S             | R            | I           | S             | R             | S             | R             | I           | S             | R             | I           | S             | R             | S             | R             | S             | R             | S             | R             | S             |
| 2020 | Total                     | 2<br>(2.27) | 2<br>(2.27) | 84<br>(95.45) | 14<br>(15.91) | 4<br>(4.55) | 70<br>(79.55) | 9<br>(10.23) | 2<br>(2.27) | 77<br>(87.5)  | 23<br>(26.44) | 64<br>(73.56) | 23<br>(26.14) | 2<br>(2.27) | 63<br>(71.59) | 17<br>(19.32) | 6<br>(6.82) | 65<br>(73.86) | 40<br>(45.45) | 48<br>(54.55) | 30<br>(38.46) | 48<br>(61.54) | 26<br>(29.55) | 62<br>(70.45) | 12<br>(14.29) | 72<br>(85.71) |
|      | Collection bag            |             |             | 1<br>(100)    |               |             | 1<br>(100)    |              |             | 1<br>(100)    | 1<br>(100)    |               |               | 1<br>(100)  |               | 1<br>(100)    |             |               | 1<br>(100)    |               |               |               |               | 1<br>(100)    |               | 1<br>(100)    |
|      | Nephrostomy catheter      |             |             | 22<br>(100)   | 4<br>(18.18)  | 2<br>(9.09) | 16<br>(72.73) |              |             | 22<br>(100)   | 7<br>(31.82)  | 15<br>(68.18) | 6<br>(27.27)  | 1<br>(4.55) | 15<br>(68.18) | 5<br>(22.73)  | 1<br>(4.55) | 16<br>(72.73) | 11<br>(50)    | 11<br>(50)    | 11<br>(50)    | 11<br>(50)    | 6<br>(27.27)  | 16<br>(72.73) | 2<br>(9.09)   | 20<br>(90.91) |
|      | Permanent catheterization |             |             | 46<br>(93.88) |               |             | 39<br>(79.59) |              |             | 41<br>(83.67) | 13<br>(26.53) | 36<br>(73.47) | 13<br>(26.53) | 1<br>(2.04) | 35<br>(71.43) | 11<br>(22.45) | 2<br>(4.08) | 36<br>(73.47) | 21<br>(42.86) | 28<br>(57.14) | 17<br>(37.78) | 28<br>(62.22) | 16<br>(32.65) | 33<br>(67.35) | 8<br>(17.39)  | 38<br>(82.61) |
|      | Clean catch midstream     | 2<br>(4.08) | 1<br>(2.04) | 46<br>(93.88) | 10<br>(20.41) |             | 39<br>(79.59) | 6<br>(12.24) | 2<br>(4.08) | 41<br>(83.67) | 13<br>(26.53) | 36<br>(73.47) | 13<br>(26.53) | 1<br>(2.04) | 35<br>(71.43) | 11<br>(22.45) | 2<br>(4.08) | 36<br>(73.47) | 21<br>(42.86) | 28<br>(57.14) | 17<br>(37.78) | 28<br>(62.22) | 16<br>(32.65) | 33<br>(67.35) | 8<br>(17.39)  | 38<br>(82.61) |
|      |                           |             | 1<br>(6.25) | 15<br>(93.75) |               | 2<br>(12.5) | 14<br>(87.5)  | 3<br>(18.75) |             | 13<br>(81.25) | 2<br>(13.33)  | 13<br>(86.67) | 3<br>(18.75)  |             | 13<br>(81.25) | 1<br>(6.25)   | 2<br>(12.5) | 13<br>(81.25) | 7<br>(43.75)  | 9<br>(56.25)  | 2<br>(18.18)  | 9<br>(81.82)  | 4<br>(25)     | 12<br>(75)    | 2<br>(13.33)  | 13<br>(86.67) |
|      | Urinary catheter          |             |             | 3<br>(100)    |               |             | 3<br>(100)    |              |             | 3<br>(100)    |               | 3<br>(100)    |               |             | 3<br>(100)    |               |             | 3<br>(100)    | 1<br>(33.33)  | 2<br>(66.67)  | 3<br>(100)    |               | 3<br>(100)    |               | 1<br>(33.33)  | 2<br>(66.67)  |
|      | Children                  | 2<br>(6.06) | 1<br>(3.03) | 30<br>(90.91) | 8<br>(24.24)  | 2<br>(6.06) | 23<br>(69.69) | 5<br>(15.15) | 1<br>(3.03) | 27<br>(81.82) | 11<br>(34.38) | 21<br>(65.63) | 11<br>(33.33) | 1<br>(3.03) | 21<br>(65.63) | 11<br>(33.33) | 1<br>(3.03) | 21<br>(63.64) | 14<br>(42.42) | 19<br>(57.58) | 11<br>(37.93) | 18<br>(62.07) | 16<br>(48.48) | 17<br>(51.52) | 5<br>(16.67)  | 25<br>(83.33) |
|      | Adults                    |             | 1<br>(1.92) | 51<br>(98.08) | 6<br>(11.54)  | 2<br>(3.85) | 44<br>(84.62) | 4<br>(7.69)  | 1<br>(1.92) | 47<br>(90.38) | 12<br>(23.08) | 40<br>(76.92) | 12<br>(23.08) | 1<br>(1.92) | 39<br>(75)    | 6<br>(11.54)  | 5<br>(9.62) | 41<br>(78.85) | 25<br>(48.08) | 27<br>(51.92) | 16<br>(34.78) | 30<br>(65.22) | 10<br>(19.23) | 42<br>(80.77) | 6<br>(11.76)  | 45<br>(88.24) |
|      | Elderly                   | 1<br>(3.13) |             | 31<br>(96.88) | 1<br>(3.13)   |             | 31<br>(96.88) |              | 2<br>(6.25) | 30<br>(93.75) | 5<br>(15.63)  | 27<br>(84.38) | 4<br>(12.5)   | 1<br>(3.13) | 27<br>(84.38) | 3<br>(9.38)   | 2<br>(6.25) | 27<br>(84.38) | 20<br>(62.5)  | 12<br>(37.5)  | 8<br>(27.59)  | 21<br>(72.41) | 4<br>(12.5)   | 28<br>(87.5)  | 7<br>(23.33)  | 23<br>(76.67) |
|      | Outpatient                | 1<br>(1.79) | 2<br>(3.57) | 53<br>(94.64) | 13<br>(23.21) | 4<br>(7.14) | 39<br>(69.64) | 9<br>(16.07) |             | 47<br>(83.93) | 18<br>(32.73) | 37<br>(67.27) | 19<br>(33.93) | 1<br>(1.79) | 36<br>(64.29) | 14<br>(25)    | 4<br>(7.14) | 38<br>(67.86) | 20<br>(35.71) | 36<br>(64.29) | 22<br>(44.89) | 27<br>(55.1)  | 22<br>(39.29) | 34<br>(60.71) | 5<br>(9.26)   | 49<br>(90.74) |
|      | Inpatient                 | 1<br>(1.92) | 1<br>(1.92) | 50<br>(96.15) | 6<br>(11.54)  | 2<br>(3.85) | 44<br>(84.62) | 3<br>(5.77)  | 2<br>(3.85) | 47<br>(90.38) | 13<br>(25)    | 39<br>(75)    | 13<br>(25)    | 1<br>(1.92) | 38<br>(73.08) | 10<br>(19.23) | 3<br>(5.77) | 39<br>(75)    | 26<br>(50)    | 26<br>(50)    | 20<br>(42.55) | 27<br>(57.45) | 11<br>(21.15) | 41<br>(78.85) | 9<br>(18)     | 41<br>(82)    |
|      | Men                       | 1<br>(2.78) | 1<br>(2.78) | 34<br>(94.44) | 8<br>(22.22)  | 2<br>(5.56) | 26<br>(72.22) | 6<br>(16.67) |             | 30<br>(83.33) | 10<br>(28.57) | 25<br>(71.43) | 10<br>(27.78) | 1<br>(2.78) | 25<br>(71.43) | 7<br>(19.44)  | 3<br>(8.33) | 26<br>(72.22) | 14<br>(38.89) | 22<br>(81.11) | 10<br>(32.26) | 21<br>(67.74) | 15<br>(41.67) | 21<br>(58.33) | 3<br>(8.82)   | 31<br>(91.18) |

AMK= Amikacin TOB=Tobramycin GEN=Gentamicin NAL=Nalidixic acid CIP=Ciprofloxacin FOF=Fosfomycin NIT= Nitrofurantoin SXT= Trimethoprim-sulfamethoxazole CST= Colistin

Table S15: Resistances to non-beta-lactams (%) of *Enterobacter cloacae* in 2021.

|      |                           | AMK          |               | TOB           |               | GEN           |               | NAL           |               | CIP           |              |               | LVX           |              |               | FOF           |               | NIT           |               | SXT           |               | CST          |               |
|------|---------------------------|--------------|---------------|---------------|---------------|---------------|---------------|---------------|---------------|---------------|--------------|---------------|---------------|--------------|---------------|---------------|---------------|---------------|---------------|---------------|---------------|--------------|---------------|
|      |                           | R            | S             | R             | S             | R             | S             | R             | S             | R             | I            | S             | R             | I            | S             | R             | S             | R             | S             | R             | S             | R            | S             |
| 2021 | Total                     | 3<br>(8.11)  | 34<br>(91.89) | 19<br>(51.35) | 18<br>(48.65) | 18<br>(48.65) | 19<br>(51.35) | 17<br>(45.95) | 20<br>(54.05) | 19<br>(51.35) | 2<br>(5.41)  | 16<br>(43.24) | 18<br>(48.65) | 2<br>(5.41)  | 17<br>(45.95) | 13<br>(35.14) | 24<br>(64.86) | 13<br>(35.14) | 24<br>(64.86) | 20<br>(54.05) | 17<br>(45.95) | 5<br>(13.51) | 32<br>(86.49) |
|      | Collection bag            |              | 1<br>(100)    |               | 1<br>(100)    |               | 1<br>(100)    |               | 1<br>(100)    |               |              | 1<br>(100)    |               |              | 1<br>(100)    |               | 1<br>(100)    |               | 1<br>(100)    |               | 1<br>(100)    |              | 1<br>(100)    |
|      | Nephrostomy catheter      |              |               |               |               |               |               |               |               |               |              |               |               |              |               |               |               |               |               |               |               |              |               |
|      | Permanent catheterization |              | 7<br>(100)    | 3<br>(42.86)  | 4<br>(57.14)  | 3<br>(42.86)  | 4<br>(57.14)  | 3<br>(42.86)  | 4<br>(57.14)  | 4<br>(57.14)  |              | 3<br>(42.86)  | 3<br>(42.86)  | 1<br>(14.29) | 3<br>(42.86)  | 3<br>(42.86)  | 4<br>(57.14)  | 3<br>(42.86)  | 4<br>(57.14)  | 4<br>(57.14)  | 3<br>(42.86)  | 1<br>(14.29) | 6<br>(85.71)  |
|      | Clean catch midstream     |              | 13<br>(100)   | 5<br>(38.46)  | 8<br>(61.54)  | 4<br>(30.77)  | 9<br>(69.23)  | 4<br>(30.77)  | 9<br>(69.23)  | 4<br>(30.77)  | 2<br>(15.38) | 7<br>(53.85)  | 5<br>(38.46)  |              | 8<br>(61.54)  | 7<br>(53.85)  | 6<br>(46.15)  | 6<br>(46.15)  | 7<br>(53.85)  | 5<br>(38.46)  | 8<br>(61.54)  | 2<br>(15.28) | 11<br>(84.62) |
|      | Urinary catheter          | 3<br>(18.75) | 13<br>(81.25) | 11<br>(68.75) | 5<br>(31.25)  | 11<br>(68.75) | 5<br>(31.25)  | 10<br>(62.5)  | 6<br>(37.5)   | 11<br>(68.75) |              | 5<br>(31.25)  | 10<br>(62.5)  | 1<br>(6.25)  | 5<br>(31.25)  | 3<br>(18.75)  | 13<br>(81.25) | 4<br>(25)     | 12<br>(75)    | 11<br>(68.75) | 5<br>(31.25)  | 2<br>(12.5)  | 14<br>(87.5)  |
|      | Children                  |              | 3<br>(100)    |               | 3<br>(100)    |               | 3<br>(100)    |               | 3<br>(100)    |               |              | 3<br>(100)    |               |              | 3<br>(100)    |               | 3<br>(100)    | 2<br>(66.67)  | 1<br>(33.33)  |               | 3<br>(100)    |              | 3<br>(100)    |
|      | Adults                    | 3<br>(12.5)  | 21<br>(87.5)  | 16<br>(66.67) | 8<br>(33.33)  | 16<br>(66.67) | 8<br>(33.33)  | 15<br>(62.5)  | 9<br>(37.5)   | 17<br>(70.83) | 1<br>(4.17)  | 6<br>(25)     | 16<br>(66.67) | 2<br>(8.33)  | 6<br>(25)     | 8<br>(33.33)  | 16<br>(66.67) | 8<br>(33.33)  | 16<br>(66.67) | 18<br>(75)    | 6<br>(25)     | 2<br>(8.33)  | 22<br>(91.67) |
|      | Elderly                   |              | 10<br>(100)   | 3<br>(30)     | 7<br>(70)     | 2<br>(20)     | 8<br>(80)     | 2<br>(20)     | 8<br>(80)     | 2<br>(20)     | 1<br>(10)    | 7<br>(70)     | 2<br>(20)     |              | 8<br>(80)     | 5<br>(50)     | 5<br>(50)     | 3<br>(30)     | 7<br>(70)     | 2<br>(20)     | 8<br>(80)     | 3<br>(30)    | 7<br>(70)     |
|      | Outpatient                |              | 6<br>(100)    | 1<br>(16.67)  | 5<br>(83.33)  |               | 6<br>(100)    |               | 6<br>(100)    | 1<br>(16.67)  |              | 5<br>(83.33)  |               |              | 6<br>(100)    | 1<br>(16.67)  | 5<br>(83.33)  | 1<br>(16.67)  | 5<br>(83.33)  |               | 6<br>(100)    | 2<br>(33.33) | 4<br>(66.67)  |
|      | Inpatient                 | 3<br>(9.67)  | 28<br>(90.32) | 18<br>(58.06) | 13<br>(41.94) | 18<br>(58.06) | 13<br>(41.94) | 17<br>(54.84) | 14<br>(45.16) | 18<br>(58.06) | 2<br>(6.45)  | 11<br>(35.48) | 18<br>(58.06) | 2<br>(6.45)  | 11<br>(35.48) | 12<br>(38.71) | 19<br>(61.29) | 12<br>(38.71) | 19<br>(61.29) | 20<br>(64.52) | 11<br>(35.48) | 3<br>(9.68)  | 28<br>(90.32) |
|      | Men                       | 1<br>(4.35)  | 22<br>(95.65) | 11<br>(47.83) | 12<br>(52.17) | 10<br>(43.47) | 13<br>(56.52) | 9<br>(39.13)  | 14<br>(60.87) | 11<br>(47.83) | 1<br>(4.35)  | 11<br>(47.83) | 9<br>(39.13)  | 2<br>(8.69)  | 12<br>(52.17) | 8<br>(34.78)  | 15<br>(65.22) | 9<br>(39.13)  | 14<br>(60.87) | 11<br>(47.83) | 12<br>(52.17) | 5<br>(21.74) | 18<br>(78.26) |
|      | Women                     | 2<br>(14.29) | 12<br>(85.71) | 8<br>(57.14)  | 6<br>(42.86)  | 8<br>(57.14)  | 6<br>(42.86)  | 8<br>(57.14)  | 6<br>(42.86)  | 8<br>(57.14)  | 1<br>(7.14)  | 5<br>(35.71)  | 9<br>(64.29)  |              | 5<br>(35.71)  | 5<br>(35.71)  | 9<br>(64.29)  | 4<br>(28.57)  | 10<br>(71.43) | 9<br>(64.29)  | 5<br>(35.71)  |              | 14<br>(100)   |

AMK= Amikacin TOB=Tobramycin GEN=Gentamicin NAL=Nalidixic acid CIP=Ciprofloxacin FOF=Fosfomycin NIT= Nitrofurantoin SXT= Trimethoprim-sulfamethoxazole CST= Colistin

Table S16: Systematic review of the resistance rates (%) of *Morganella morganii* in urine cultures.

| Author (year of publication)           | Period    | Place          | N          | AMC          | AMP          | CTX          | CAZ          | CRO          | FEP         | IMI         | MEM         | TZP          | AMK         | TOB          | GEN          | FOF          | CIP          | SXT          |
|----------------------------------------|-----------|----------------|------------|--------------|--------------|--------------|--------------|--------------|-------------|-------------|-------------|--------------|-------------|--------------|--------------|--------------|--------------|--------------|
| T. Demir (2013) <sup>21</sup>          | 2008-2012 | Turkey         | 7          | 71.4         | 85.7         |              | 28.6         |              |             |             |             |              |             |              | 57.1         | 100          | 28.6         | 57.1         |
| R. K. Flamm <sup>22</sup> (2014)       | 2011      | Europe         | 36         |              |              | 5.6          | 5.6          | 5.6          | 0           |             | 0           | 0            |             |              |              |              | 5.6          |              |
| E. Mantadakis (2015) <sup>23</sup>     | 2008-2014 | Greece         | 2          | 100          | 100          | 0            | 0            | 0            |             | 0           | 0           |              | 100         | 0            | 0            |              |              | 0            |
| H. Seifert (2018) <sup>17</sup>        | 2014-2015 | Germany        | 25         |              |              |              | 28           | 32           | 12          |             | 0           | 0            | 0           | 8            |              | 92           | 16           |              |
| G. Jiménez Guerra (2020) <sup>19</sup> | 2006-2016 | Spain          | 167        |              |              |              |              |              | 10          | 11          |             | 19           |             | 22           | 10           | 4            | 16           | 14           |
| J. Hrbacek (2021) <sup>24</sup>        | 2011-2019 | Czech Republic | 194        | 92.9         | 95.7         | 16.3         | 13.7         |              | 14.3        | 1.1         | 1.1         | 13.6         | 4.3         |              | 12.4         |              | 34.4         | 27.5         |
| <b>Weighted averages</b>               |           |                | <b>431</b> | <b>92.23</b> | <b>95.39</b> | <b>14.49</b> | <b>14.24</b> | <b>15.89</b> | <b>11.1</b> | <b>5.65</b> | <b>0.83</b> | <b>13.95</b> | <b>4.68</b> | <b>19.97</b> | <b>12.09</b> | <b>18.43</b> | <b>23.47</b> | <b>21.82</b> |

AMX=Amoxicillin AMP=Ampicillin CTX=Cefotaxime CAZ=Ceftazidime CRO=Ceftriaxone FEP=Cefepime IPM=Imipenem MEM=Meropenem TZP=Piperacillin-tazobactam AMK=Amikacin

TOB=Tobramycin GEN=Gentamicin FOF=Fosfomycin CIP=Ciprofloxacin SXT=Trimethoprim-sulfamethoxazole

Table S17: General annualized resistances (%) of *Morganella morganii* during 2016-2021

|              | TIC              | CXM                | FOX               | CFM              | CTX               | CAZ               | FEP             | IPM               | TZP             | TOB              | GEN               | NAL               | CIP               | FOF                | NIT               | SXT               |
|--------------|------------------|--------------------|-------------------|------------------|-------------------|-------------------|-----------------|-------------------|-----------------|------------------|-------------------|-------------------|-------------------|--------------------|-------------------|-------------------|
| <b>2016</b>  | -<br>(79.41)     | 27/34<br>(79.41)   | 4/34<br>(11.76)   | -                | 4/33<br>(12.12)   | 3/34<br>(8.82)    | 0/34<br>(0)     | 10/34<br>(29.41)  | 0/34<br>(0)     | 2/34<br>(5.88)   | 6/34<br>(17.65)   | 14/34<br>(41.18)  | 10/34<br>(29.41)  | 26/34<br>(76.47)   | 6/34<br>(17.65)   | 12/34<br>(35.29)  |
| <b>2017</b>  | -<br>(58.82)     | 20/34<br>(58.82)   | 5/34<br>(14.71)   | -                | 7/34<br>(20.59)   | 2/37<br>(5.41)    | 0/37<br>(0)     | 7/31<br>(22.58)   | 1/37<br>(2.7)   | 1/37<br>(2.7)    | 11/37<br>(29.73)  | 23/34<br>(67.65)  | 10/37<br>(27.03)  | 29/35<br>(82.86)   | 17/34<br>(50)     | 15/37<br>(40.54)  |
| <b>2018</b>  | -<br>(68.97)     | 20/29<br>(68.97)   | 2/29<br>(6.89)    | -                | 3/29<br>(10.34)   | 0/29<br>(0)       | 0/29<br>(0)     | 5/17<br>(29.41)   | 0/29<br>(0)     | 2/29<br>(6.89)   | 6/29<br>(20.69)   | 13/29<br>(44.83)  | 4/29<br>(13.79)   | 21/29<br>(72.41)   | 12/29<br>(41.38)  | 7/29<br>(24.14)   |
| <b>2019</b>  | 6/24<br>(25)     | 29/30<br>(96.67)   | 0/7<br>(0)        | 17/22<br>(77.27) | 9/29<br>(31.03)   | 6/30<br>(20)      | 1/31<br>(2.23)  | 6/29<br>(20.69)   | 0/31<br>(0)     | 0/31<br>(0)      | 4/31<br>(12.9)    | 13/30<br>(43.33)  | 7/31<br>(22.58)   | 26/30<br>(86.67)   | 23/30<br>(76.67)  | 9/31<br>(29.03)   |
| <b>2020</b>  | 11/26<br>(42.31) | 25/26<br>(96.15)   |                   | 21/24<br>(87.5)  | 12/26<br>(46.15)  | 8/26<br>(30.77)   | 5/26<br>(19.23) | 2/20<br>(10)      | 1/26<br>(3.85)  | 6/26<br>(23.08)  | 8/26<br>(30.77)   | 12/26<br>(46.15)  | 11/26<br>(42.31)  | 23/26<br>(88.46)   | 25/25<br>(100)    | 11/26<br>(42.31)  |
| <b>2021</b>  | 3/11<br>(27.27)  | 10/11<br>(90.91)   | -                 | 8/10<br>(80)     | 6/11<br>(54.55)   | 4/11<br>(36.36)   | 2/11<br>(18.18) | 1/11<br>(9.09)    | 1/11<br>(9.09)  | 2/11<br>(18.18)  | 2/11<br>(18.18)   | 2/11<br>(18.18)   | 3/11<br>(27.27)   | 8/11<br>(72.73)    | 11/11<br>(100)    | 2/11<br>(18.18)   |
| <b>Total</b> | 20/61<br>(32.79) | 131/164<br>(79.88) | 11/104<br>(10.58) | 46/56<br>(82.14) | 41/162<br>(25.31) | 23/167<br>(13.77) | 8/168<br>(4.76) | 31/142<br>(21.83) | 3/168<br>(1.79) | 13/168<br>(7.74) | 37/168<br>(22.02) | 77/164<br>(46.95) | 45/168<br>(26.79) | 133/165<br>(80.61) | 94/163<br>(57.67) | 56/168<br>(33.33) |

TIC=Ticarcillin; CXM=Cefuroxime; FOX=Cefoxitin; CFM=Cefixime; CTX=Cefotaxime; CAZ=Ceftazidime; FEP=Cefepime; IPM=Imipenem; TZP=Piperacillin-tazobactam; TOB=Tobramycin; GEN=Gentamicin; NAL=Nalidixic acid; CIP=Ciprofloxacin; FOF=Fosfomycin NIT=Nitrofurantoin; SXT=Trimethoprim-sulfamethoxazole.



Table S18: Resistances to beta-lactams (%) of *Morganella morganii* in 2016.

|      |                           | CXM           |              |              | FOX                 |              |               | CTX                           |              |               | CAZ          |             |               | FEP         |               |               | IPM           |              |   | TZP         |   |
|------|---------------------------|---------------|--------------|--------------|---------------------|--------------|---------------|-------------------------------|--------------|---------------|--------------|-------------|---------------|-------------|---------------|---------------|---------------|--------------|---|-------------|---|
|      |                           | R             | I            | S            | R                   | I            | S             | R                             | I            | S             | R            | I           | S             | R           | I             | S             | R             | I            | S | R           | S |
| 2016 | Total                     | 27<br>(79.41) | 3<br>(8.82)  | 4<br>(11.76) | 4<br>(11.76)        | 2<br>(5.88)  | 28<br>(82.35) | 4<br>(12.12)                  | 7<br>(21.21) | 22<br>(66.67) | 3<br>(8.82)  | 1<br>(2.94) | 30<br>(88.24) | 1<br>(2.94) | 33<br>(97.06) | 10<br>(29.41) | 21<br>(61.76) | 3<br>(8.82)  |   | 34<br>(100) |   |
|      | Collection bag            | 2<br>(100)    |              |              | 2<br>(100)          |              |               | 1<br>(50)                     |              |               | 1<br>(50)    |             |               | 2<br>(100)  |               |               | 2<br>(100)    |              |   | 2<br>(100)  |   |
|      | Permanent catheterization | 2<br>(100)    |              |              | 2<br>(100)          |              |               | 1<br>(100)                    |              |               | 2<br>(100)   |             |               | 2<br>(100)  |               |               | 1<br>(50)     | 1<br>(50)    |   | 2<br>(100)  |   |
|      | Clean catch midstream     | 15<br>(88.24) | 1<br>(5.88)  | 1<br>(5.88)  | 2<br>(11.76)        | 1<br>(5.88)  | 14<br>(82.35) | 3<br>(17.65)                  | 5<br>(29.41) | 9<br>(52.94)  | 2<br>(11.76) |             | 15<br>(88.24) | 1<br>(5.88) | 16<br>(94.12) | 6<br>(35.29)  | 11<br>(64.71) |              |   | 17<br>(100) |   |
|      | Urinary catheter          | 8<br>(61.54)  | 2<br>(15.38) | 3<br>(23.08) | 2<br>(15.38)        | 1<br>(7.69)  | 10<br>(76.92) |                               | 2<br>(15.38) | 11<br>(84.62) |              | 1<br>(7.69) | 12<br>(92.31) |             | 13<br>(100)   | 3<br>(23.08)  | 7<br>(53.85)  | 3<br>(23.08) |   | 13<br>(100) |   |
|      | Children                  | 5<br>(100)    |              |              | 1<br>(20) 4<br>(80) |              |               | 1<br>(20) 1<br>(20) 3<br>(60) |              |               | 1<br>(20)    |             |               | 5<br>(100)  |               |               | 1<br>(20)     | 4<br>(80)    |   | 5<br>(100)  |   |
|      | Adults                    | 9<br>(69.23)  | 2<br>(15.38) | 2<br>(15.38) | 3<br>(23.08)        |              | 10<br>(76.92) | 3<br>(23.08)                  | 3<br>(23.08) | 7<br>(53.85)  | 2<br>(15.38) | 1<br>(7.69) | 10<br>(76.92) | 1<br>(7.69) | 12<br>(92.31) | 5<br>(38.46)  | 7<br>(53.85)  | 1<br>(6.67)  |   | 13<br>(100) |   |
|      | Elderly                   | 13<br>(81.25) | 1<br>(6.25)  | 2<br>(12.5)  | 1<br>(6.25)         | 1<br>(6.25)  | 14<br>(87.5)  |                               | 3<br>(20)    | 12<br>(80)    |              |             | 16<br>(100)   |             | 16<br>(100)   | 4<br>(25)     | 10<br>(62.5)  | 2<br>(12.5)  |   | 16<br>(100) |   |
|      | Outpatient                | 19<br>(79.17) | 3<br>(12.5)  | 2<br>(8.33)  | 3<br>(12.5)         | 2<br>(8.33)  | 19<br>(79.17) | 3<br>(13.04)                  | 7<br>(30.43) | 13<br>(56.52) | 2<br>(88.33) | 1<br>(4.17) | 21<br>(87.5)  | 1<br>(4.17) | 13<br>(95.83) | 8<br>(33.33)  | 14<br>(58.33) | 2<br>(8.33)  |   | 24<br>(100) |   |
|      | Inpatient                 | 8<br>(80)     |              | 2<br>(20)    | 1<br>(10)           |              | 9<br>(90)     | 1<br>(10)                     |              | 9<br>(90)     | 1<br>(10)    |             | 9<br>(90)     |             | 11<br>(100)   | 2<br>(20)     | 7<br>(70)     | 1<br>(10)    |   | 10<br>(100) |   |
|      | Men                       | 16<br>(80)    | 2<br>(10)    | 2<br>(10)    | 3<br>(15)           |              | 17<br>(85)    | 4<br>(21.05)                  | 5<br>(26.32) | 10<br>(52.63) | 3<br>(15)    | 1<br>(5)    | 16<br>(80)    | 1<br>(5)    | 19<br>(95)    | 4<br>(20)     | 15<br>(75)    | 1<br>(5)     |   | 20<br>(100) |   |
|      | Women                     | 11<br>(78.57) | 1<br>(7.14)  | 2<br>(14.29) | 1<br>(7.14)         | 2<br>(14.29) | 11<br>(78.57) |                               | 2<br>(14.29) | 12<br>(85.71) |              |             | 14<br>(100)   |             | 14<br>(100)   | 6<br>(42.86)  | 6<br>(42.86)  | 2<br>(14.29) |   | 14<br>(100) |   |

CXM=Cefuroxime FOX=Cefoxitin CTX=Cefotaxime CAZ=Ceftazidime FEP=Cefepime IPM=Imipenem TZP=Piperacillin-tazobactam

Table S19: Resistances to beta-lactams (%) of *Morganella morganii* in 2017.

|      |                           | CXM           |              |               | FOX          |              |               | CTX          |              |               | CAZ          |             |               | FEP          |   |               | IPM          |               |              | TZP          |               |
|------|---------------------------|---------------|--------------|---------------|--------------|--------------|---------------|--------------|--------------|---------------|--------------|-------------|---------------|--------------|---|---------------|--------------|---------------|--------------|--------------|---------------|
|      |                           | R             | I            | S             | R            | I            | S             | R            | I            | S             | R            | I           | S             | R            | I | S             | R            | I             | S            | R            | S             |
| 2017 | Total                     | 20<br>(58.82) | 3<br>(8.82)  | 11<br>(32.35) | 5<br>(14.71) | 1<br>(2.94)  | 28<br>(82.35) | 7<br>(20.59) | 3<br>(8.82)  | 24<br>(70.59) | 2<br>(5.41)  | 1<br>(2.7)  | 34<br>(91.89) | 3<br>(8.11)  |   | 34<br>(91.89) | 7<br>(22.58) | 16<br>(51.61) | 8<br>(25.81) | 1<br>(2.7)   | 36<br>(97.29) |
|      | Permanent catheterization | 3<br>(75)     |              | 1<br>(25)     | 2<br>(50)    |              | 2<br>(50)     | 2<br>(50)    |              | 2<br>(50)     | 1<br>(20)    |             | 4<br>(80)     | 2<br>(40)    |   | 3<br>(60)     |              | 4<br>(100)    |              |              | 5<br>(100)    |
|      | Clean catch midstream     | 17<br>(70.83) | 1<br>(4.17)  | 6<br>(25)     | 3<br>(12.5)  |              | 21<br>(87.5)  | 4<br>(16.67) | 3<br>(12.5)  | 17<br>(70.83) | 1<br>(3.85)  | 1<br>(3.85) | 24<br>(92.31) | 1<br>(3.85)  |   | 25<br>(96.15) | 7<br>(33.33) | 10<br>(47.62) | 4<br>(19.05) | 1<br>(3.85)  | 25<br>(96.15) |
|      | Urinary catheter          |               | 2<br>(33.33) | 4<br>(66.67)  |              | 1<br>(16.67) | 5<br>(83.33)  | 1<br>(16.67) |              | 5<br>(83.33)  |              |             | 6<br>(100)    |              |   | 6<br>(100)    |              | 2<br>(33.33)  | 4<br>(66.67) |              | 6<br>(100)    |
|      | Children                  | 3<br>(100)    |              |               |              |              | 3<br>(100)    | 1<br>(33.33) |              | 2<br>(66.67)  |              |             | 3<br>(100)    |              |   | 3<br>(100)    | 1<br>(50)    |               | 1<br>(50)    |              | 3<br>(100)    |
|      | Adults                    | 5<br>(100)    |              |               | 2<br>(40)    |              | 3<br>(60)     | 1<br>(20)    |              | 4<br>(80)     | 2<br>(33.33) |             | 4<br>(66.67)  | 1<br>(16.67) |   | 5<br>(83.33)  | 1<br>(16.67) | 4<br>(66.67)  | 1<br>(16.67) | 1<br>(16.67) | 5<br>(83.33)  |
|      | Elderly                   | 12<br>(46.15) | 3<br>(11.54) | 11<br>(42.31) | 3<br>(11.54) | 1<br>(3.85)  | 22<br>(84.62) | 5<br>(19.23) | 3<br>(11.54) | 18<br>(69.23) |              | 1<br>(3.57) | 27<br>(96.43) | 2<br>(7.14)  |   | 26<br>(92.86) | 5<br>(21.74) | 12<br>(52.17) | 6<br>(26.09) |              | 28<br>(100)   |
|      | Outpatient                | 7<br>(43.75)  | 2<br>(12.5)  | 7<br>(43.75)  |              |              | 16<br>(100)   | 2<br>(12.5)  | 2<br>(12.5)  | 12<br>(75)    |              | 1<br>(6.25) | 15<br>(93.75) |              |   | 16<br>(100)   | 3<br>(23.08) | 8<br>(61.54)  | 2<br>(15.38) |              | 16<br>(100)   |
|      | Inpatient                 | 13<br>(72.22) | 1<br>(5.56)  | 4<br>(22.22)  | 5<br>(27.78) | 1<br>(5.56)  | 12<br>(66.67) | 5<br>(27.78) | 1<br>(5.56)  | 12<br>(66.67) | 2<br>(9.52)  |             | 19<br>(90.48) | 3<br>(14.29) |   | 18<br>(85.71) | 4<br>(22.22) | 8<br>(44.44)  | 6<br>(33.33) | 1<br>(4.76)  | 20<br>(95.24) |
|      | Men                       | 10<br>(52.63) | 2<br>(10.53) | 7<br>(36.84)  | 2<br>(10.53) | 1<br>(5.26)  | 16<br>(84.21) | 4<br>(21.05) | 2<br>(10.53) | 13<br>(68.41) | 1<br>(5)     |             | 19<br>(95)    | 2<br>(10)    |   | 18<br>(90)    | 4<br>(25)    | 8<br>(50)     | 4<br>(25)    |              | 20<br>(100)   |
|      | Women                     | 10<br>(66.67) | 1<br>(6.67)  | 4<br>(26.67)  | 3<br>(20)    |              | 12<br>(80)    | 3<br>(20)    | 1<br>(6.67)  | 11<br>(73.33) | 1<br>(5.88)  | 1<br>(5.88) | 15<br>(88.24) | 1<br>(5.88)  |   | 16<br>(94.12) | 3<br>(20)    | 8<br>(53.33)  | 4<br>(26.67) | 1<br>(5.88)  | 16<br>(94.12) |

CXM=Cefuroxime FOX=Cefoxitin CTX=Cefotaxime CAZ=Ceftazidime FEP=Cefepime IPM=Imipenem TZP=Piperacillin-tazobactam

Table S20: Resistances to beta-lactams (%) of *Morganella morganii* in 2018.

|      |                           | CXM           |              |              | FOX          |              |               | CTX          |              |               | CAZ          |               | FEP         |              | IMI           |              |             | PTZ |   |
|------|---------------------------|---------------|--------------|--------------|--------------|--------------|---------------|--------------|--------------|---------------|--------------|---------------|-------------|--------------|---------------|--------------|-------------|-----|---|
|      |                           | R             | I            | S            | R            | I            | S             | R            | I            | S             | R            | I             | S           | R            | S             | R            | I           | S   | R |
| 2018 | Total                     | 20<br>(68.97) | 6<br>(20.69) | 3<br>(10.34) | 2<br>(6.89)  | 1<br>(3.45)  | 26<br>(89.66) | 3<br>(10.34) | 4<br>(13.79) | 22<br>(75.86) | 2<br>(6.89)  | 27<br>(93.1)  | 29<br>(100) | 5<br>(29.41) | 10<br>(58.82) | 2<br>(11.76) | 29<br>(100) |     |   |
|      | Permanent catheterization | 6<br>(66.67)  | 2<br>(22.22) | 1<br>(11.11) | 1<br>(11.11) |              | 8<br>(88.89)  |              | 2<br>(22.22) | 7<br>(77.78)  |              | 9<br>(100)    | 9<br>(100)  | 1<br>(20)    | 3<br>(60)     | 1<br>(20)    | 9<br>(100)  |     |   |
|      | Clean catch midstream     | 12<br>(66.67) | 4<br>(22.22) | 2<br>(11.11) |              | 1<br>(5.56)  | 17<br>(94.44) | 2<br>(11.11) | 2<br>(11.11) | 14<br>(77.78) | 1<br>(5.56)  | 17<br>(94.44) | 18<br>(100) | 3<br>(30)    | 6<br>(60)     | 1<br>(10)    | 18<br>(100) |     |   |
|      | Urinary catheter          | 2<br>(100)    |              |              | 1<br>(50)    |              | 1<br>(50)     | 1<br>(50)    |              | 1<br>(50)     | 1<br>(50)    | 1<br>(50)     | 2<br>(100)  | 1<br>(50)    | 1<br>(50)     |              | 2<br>(100)  |     |   |
|      | Children                  | 1<br>(100)    |              |              |              |              | 1<br>(100)    | 1<br>(100)   |              |               |              | 1<br>(100)    | 1<br>(100)  | 1<br>(100)   |               |              | 1<br>(100)  |     |   |
|      | Adults                    | 3<br>(37.5)   | 3<br>(37.5)  | 2<br>(25)    | 1<br>(12.5)  |              | 7<br>(87.5)   |              | 1<br>(12.5)  | 7<br>(87.5)   |              | 8<br>(100)    | 8<br>(100)  |              | 2<br>(50)     | 2<br>(50)    | 10<br>(100) |     |   |
|      | Elderly                   | 16<br>(80)    | 3<br>(15)    | 1<br>(5)     | 1<br>(5)     | 1<br>(5)     | 18<br>(90)    | 3<br>(15)    | 3<br>(15)    | 14<br>(70)    | 2<br>(10)    | 18<br>(90)    | 20<br>(100) | 4<br>(33.33) | 8<br>(66.67)  |              | 18<br>(100) |     |   |
|      | Outpatient                | 6<br>(85.71)  | 1<br>(14.29) |              |              | 1<br>(14.29) | 6<br>(85.71)  | 2<br>(28.57) | 1<br>(14.29) | 4<br>(57.14)  | 1<br>(14.29) | 6<br>(85.71)  | 7<br>(100)  |              | 5<br>(100)    |              | 7<br>(100)  |     |   |
|      | Inpatient                 | 14<br>(63.64) | 5<br>(22.73) | 3<br>(13.64) | 2<br>(9.09)  |              | 20<br>(90.91) | 1<br>(4.55)  | 3<br>(13.64) | 18<br>(81.82) | 1<br>(4.55)  | 21<br>(95.45) | 21<br>(100) | 5<br>(41.67) | 5<br>(41.67)  | 2<br>(16.67) | 21<br>(100) |     |   |
|      | Men                       | 10<br>(62.5)  | 3<br>(18.75) | 3<br>(18.75) | 2<br>(12.5)  |              | 14<br>(87.5)  | 1<br>(6.25)  | 2<br>(12.5)  | 13<br>(81.25) | 1<br>(6.25)  | 15<br>(93.75) | 16<br>(100) | 4<br>(33.33) | 6<br>(50)     | 2<br>(16.67) | 16<br>(100) |     |   |
|      | Women                     | 10<br>(76.92) | 3<br>(23.08) |              |              | 1<br>(7.69)  | 12<br>(92.31) | 2<br>(15.38) | 2<br>(15.38) | 9<br>(69.23)  | 1<br>(7.69)  | 12<br>(92.31) | 13<br>(100) | 1<br>(20)    | 4<br>(80)     |              | 13<br>(100) |     |   |

CXM=Cefuroxime FOX=Cefoxitin CTX=Cefotaxime CAZ=Ceftazidime FEP=Cefepime IPM=Imipenem TZP=Piperacillin-tazobactam

Table S21: Resistances to beta-lactams (%) of *Morganella morganii* in 2019.

|      |                           | TIC          |              |               | CXM           |              | FOX        |   | CFM           |              | CTX          |             |               | CAZ          |              |               | FEP         |               | IPM          |               |             | TZP         |   |
|------|---------------------------|--------------|--------------|---------------|---------------|--------------|------------|---|---------------|--------------|--------------|-------------|---------------|--------------|--------------|---------------|-------------|---------------|--------------|---------------|-------------|-------------|---|
|      |                           | R            | I            | S             | R             | S            | R          | S | R             | S            | R            | I           | S             | R            | I            | S             | R           | S             | R            | I             | S           | R           | S |
| 2019 | Total                     | 6<br>(25)    | 4<br>(16.67) | 14<br>(58.33) | 29<br>(96.67) | 1<br>(3.33)  | 7<br>(100) |   | 17<br>(77.27) | 5<br>(22.73) | 9<br>(31.03) | 1<br>(3.45) | 19<br>(65.52) | 6<br>(20)    | 4<br>(13.33) | 20<br>(66.67) | 1<br>(2.23) | 30<br>(96.77) | 6<br>(20.69) | 21<br>(72.41) | 2<br>(6.89) | 31<br>(100) |   |
|      | Permanent catheterization | 1<br>(100)   |              |               | 4<br>(100)    |              | 3<br>(100) |   |               |              |              |             | 3<br>(100)    |              |              | 3<br>(100)    |             | 4<br>(100)    | 3<br>(75)    | 1<br>(25)     |             | 4<br>(100)  |   |
|      | Clean catch midstream     | 4<br>(28.57) | 3<br>(21.43) | 7<br>(50)     | 17<br>(100)   |              | 3<br>(100) |   | 12<br>(85.71) | 2<br>(14.29) | 7<br>(41.18) | 1<br>(5.88) | 9<br>(52.94)  | 4<br>(23.53) | 3<br>(17.65) | 10<br>(58.82) | 1<br>(5.88) | 16<br>(94.12) | 1<br>(5.88)  | 16<br>(94.12) |             | 17<br>(100) |   |
|      | Urinary catheter          | 1<br>(11.11) | 1<br>(11.11) | 7<br>(77.78)  | 8<br>(88.89)  | 1<br>(11.11) | 1<br>(100) |   | 5<br>(62.5)   | 3<br>(37.5)  | 2<br>(22.22) |             | 7<br>(77.78)  | 2<br>(20)    | 1<br>(10)    | 7<br>(70)     |             | 10<br>(100)   | 2<br>(25)    | 4<br>(50)     | 2<br>(25)   | 10<br>(100) |   |
|      | Children                  |              |              | 2<br>(100)    | 3<br>(100)    |              | 1<br>(100) |   | 1<br>(50)     | 1<br>(50)    | 1<br>(33.33) |             | 2<br>(66.67)  |              | 1<br>(33.33) | 2<br>(66.67)  |             | 3<br>(100)    | 1<br>(50)    | 1<br>(50)     |             | 3<br>(100)  |   |
|      | Adults                    | 1<br>(14.29) | 2<br>(28.57) | 4<br>(57.14)  | 8<br>(100)    |              | 1<br>(100) |   | 6<br>(100)    |              | 1<br>(14.29) |             | 6<br>(85.71)  |              | 2<br>(28.57) | 5<br>(71.43)  |             | 8<br>(100)    |              | 7<br>(87.5)   | 1<br>(12.5) | 8<br>(100)  |   |
|      | Elderly                   | 5<br>(33.33) | 2<br>(13.33) | 8<br>(53.33)  | 18<br>(94.74) | 1<br>(5.26)  | 5<br>(100) |   | 10<br>(71.43) | 4<br>(28.57) | 7<br>(36.84) | 1<br>(5.26) | 11<br>(57.89) | 6<br>(30)    | 1<br>(5)     | 13<br>(65)    | 1<br>(5)    | 19<br>(95)    | 5<br>(26.32) | 13<br>(68.42) | 1<br>(5.26) | 21<br>(100) |   |
|      | Outpatient                | 3<br>(23.08) | 3<br>(23.08) | 7<br>(53.85)  | 14<br>(100)   |              | 2<br>(100) |   | 9<br>(75)     | 3<br>(25)    | 8<br>(57.14) | 1<br>(7.14) | 5<br>(35.71)  | 5<br>(33.33) | 3<br>(20)    | 7<br>(46.67)  | 1<br>(6.67) | 14<br>(93.33) | 2<br>(14.29) | 11<br>(78.57) | 1<br>(7.14) | 15<br>(100) |   |
|      | Inpatient                 | 3<br>(27.27) | 1<br>(9.09)  | 7<br>(63.64)  | 15<br>(93.75) | 1<br>(6.25)  | 5<br>(100) |   | 8<br>(80)     | 2<br>(20)    | 1<br>(6.67)  |             | 14<br>(93.33) | 1<br>(6.67)  | 1<br>(6.67)  | 13<br>(86.67) |             | 16<br>(100)   | 4<br>(26.67) | 10<br>(66.67) | 1<br>(6.67) | 16<br>(100) |   |
|      | Men                       | 5<br>(35.71) | 2<br>(14.29) | 7<br>(50)     | 16<br>(94.12) | 1<br>(5.88)  | 3<br>(100) |   | 11<br>(84.62) | 2<br>(15.38) | 6<br>(37.5)  | 1<br>(6.25) | 9<br>(56.25)  | 3<br>(18.75) | 2<br>(12.5)  | 11<br>(68.75) |             | 17<br>(100)   | 2<br>(12.5)  | 13<br>(81.25) | 1<br>(6.25) | 17<br>(100) |   |
|      | Women                     | 1<br>(10)    | 2<br>(20)    | 7<br>(70)     | 13<br>(100)   |              | 4<br>(100) |   | 6<br>(66.67)  | 3<br>(33.33) | 3<br>(23.08) |             | 10<br>(76.92) | 3<br>(21.43) | 2<br>(14.29) | 9<br>(64.29)  | 1<br>(7.14) | 13<br>(92.86) | 4<br>(30.77) | 8<br>(61.54)  | 1<br>(7.69) | 14<br>(100) |   |

TIC= Ticarcillin CXM=Cefuroxime FOX=Cefoxitin CFM= Cefixime CTX=Cefotaxime CAZ=Ceftazidime FEP=Cefepime IPM=Imipenem TZP=Piperacillin-tazobactam

Table S22: Resistances to beta-lactams (%) of *Morganella morganii* in 2020.

|      |                           | TIC           |              |               | CXM           |             | CFM           |              | CTX           |             |               | CAZ          |              |               | FEP          |               | IPM          |              |              | TZP         |               |
|------|---------------------------|---------------|--------------|---------------|---------------|-------------|---------------|--------------|---------------|-------------|---------------|--------------|--------------|---------------|--------------|---------------|--------------|--------------|--------------|-------------|---------------|
|      |                           | R             | I            | S             | R             | S           | R             | S            | R             | I           | S             | R            | I            | S             | R            | S             | R            | I            | S            | R           | S             |
| 2020 | Total                     | 11<br>(42.31) | 4<br>(15.38) | 11<br>(42.31) | 25<br>(96.15) | 1<br>(3.85) | 21<br>(87.5)  | 3<br>(12.5)  | 12<br>(46.15) | 1<br>(3.85) | 13<br>(50)    | 8<br>(30.77) | 5<br>(19.23) | 13<br>(50)    | 5<br>(19.23) | 21<br>(80.77) | 2<br>(10)    | 10<br>(50)   | 8<br>(40)    | 1<br>(3.85) | 25<br>(96.15) |
|      | Permanent catheterization |               |              | 4<br>(100)    | 4<br>(100)    |             | 1<br>(33.33)  | 2<br>(66.67) |               |             | 4<br>(100)    |              |              | 4<br>(100)    |              | 4<br>(100)    |              | 1<br>(33.3)  | 2<br>(66.67) |             | 4<br>(100)    |
|      | Clean catch midstream     | 7<br>(58.33)  | 3<br>(25)    | 2<br>(16.67)  | 11<br>(91.67) | 1<br>(8.33) | 11<br>(91.67) | 1<br>(8.33)  | 8<br>(75)     |             | 4<br>(25)     | 7<br>(58.33) | 2<br>(16.67) | 3<br>(25)     | 4<br>(25)    | 8<br>(75)     | 1<br>(12.5)  | 5<br>(62.5)  | 2<br>(25)    | 1<br>(8.33) | 11<br>(91.67) |
|      | Urinary catheter          | 4<br>(40)     | 1<br>(10)    | 5<br>(50)     | 10<br>(100)   |             | 9<br>(100)    |              | 4<br>(40)     | 1<br>(10)   | 5<br>(50)     | 1<br>(10)    | 3<br>(30)    | 6<br>(60)     | 1<br>(10)    | 9<br>(90)     | 1<br>(11.11) | 4<br>(44.44) | 4<br>(44.44) |             | 10<br>(100)   |
|      | Children                  |               |              | 1<br>(100)    | 1<br>(100)    |             | 1<br>(100)    |              |               |             | 1<br>(100)    |              |              | 1<br>(100)    |              | 1<br>(100)    |              | 1<br>(100)   |              |             | 1<br>(100)    |
|      | Adults                    | 2<br>(40)     |              | 3<br>(60)     | 5<br>(100)    |             | 2<br>(66.67)  | 1<br>(33.33) | 2<br>(40)     |             | 3<br>(60)     | 2<br>(40)    |              | 3<br>(60)     |              | 5<br>(100)    |              | 3<br>(75)    | 1<br>(25)    |             | 5<br>(100)    |
|      | Elderly                   | 6<br>(46.15)  | 3<br>(23.08) | 4<br>(30.77)  | 19<br>(95)    | 1<br>(5)    | 18<br>(90)    | 2<br>(10)    | 10<br>(50)    | 1<br>(5)    | 9<br>(45)     | 6<br>(30)    | 5<br>(25)    | 9<br>(45)     | 5<br>(25)    | 15<br>(75)    | 2<br>(13.33) | 6<br>(40)    | 7<br>(46.67) | 1<br>(5)    | 19<br>(95)    |
|      | Outpatient                | 9<br>(45)     | 4<br>(20)    | 7<br>(35)     | 12<br>(92.31) | 1<br>(7.69) | 10<br>(76.92) | 3<br>(23.08) | 7<br>(53.85)  |             | 6<br>(46.15)  | 5<br>(38.46) | 1<br>(7.69)  | 7<br>(53.85)  | 3<br>(23.08) | 10<br>(76.92) | 1<br>(10)    | 5<br>(50)    | 4<br>(40)    |             | 13<br>(100)   |
|      | Inpatient                 | 5<br>(38.46)  | 1<br>(7.69)  | 7<br>(53.85)  | 13<br>(100)   |             | 11<br>(100)   |              | 5<br>(38.46)  | 1<br>(7.69) | 7<br>(53.85)  | 3<br>(23.08) | 4<br>(30.77) | 6<br>(46.15)  | 2<br>(15.38) | 11<br>(84.62) | 1<br>(10)    | 5<br>(50)    | 4<br>(40)    | 1<br>(7.69) | 12<br>(92.31) |
|      | Men                       | 5<br>(33.33)  | 1<br>(16.67) | 9<br>(60)     | 14<br>(93.33) | 1<br>(6.67) | 11<br>(78.57) | 3<br>(21.43) | 5<br>(33.33)  |             | 10<br>(66.67) | 4<br>(26.67) | 1<br>(6.67)  | 10<br>(66.67) | 2<br>(13.33) | 13<br>(86.67) | 2<br>(14.29) | 6<br>(42.86) | 6<br>(42.86) | 1<br>(6.67) | 14<br>(93.33) |
|      | Women                     | 6<br>(54.55)  | 3<br>(27.27) | 2<br>(18.18)  | 11<br>(100)   |             | 10<br>(100)   |              | 7<br>(63.64)  | 1<br>(9.09) | 3<br>(27.27)  | 4<br>(36.36) | 4<br>(36.36) | 3<br>(27.27)  | 3<br>(27.27) | 8<br>(72.73)  |              | 4<br>(66.67) | 2<br>(33.33) |             | 11<br>(100)   |

TIC= Ticarcillin CXM=Cefuroxime CFM= Cefixime CTX=Cefotaxime CAZ=Ceftazidime FEP=Cefepime IPM=Imipenem TZP=Piperacillin-tazobactam

Table S23: Resistances to beta-lactams (%) of *Morganella morganii* in 2021.

|      |                           | TIC          |              |              | CXM           |              | CFM          |              | CTX          |              | CAZ          |              |              | FEP          |              | IPM          |               |   | TZP          |               |
|------|---------------------------|--------------|--------------|--------------|---------------|--------------|--------------|--------------|--------------|--------------|--------------|--------------|--------------|--------------|--------------|--------------|---------------|---|--------------|---------------|
|      |                           | R            | I            | S            | R             | S            | R            | S            | R            | S            | R            | I            | S            | R            | S            | R            | I             | S | R            | S             |
| 2021 | Total                     | 3<br>(27.27) | 2<br>(18.18) | 6<br>(54.55) | 10<br>(90.91) | 1<br>(9.09)  | 8<br>(80)    | 2<br>(20)    | 6<br>(54.55) | 5<br>(45.45) | 4<br>(36.36) | 2<br>(18.18) | 5<br>(45.45) | 2<br>(18.18) | 9<br>(81.82) | 1<br>(9.09)  | 10<br>(90.91) |   | 1<br>(9.09)  | 10<br>(90.91) |
|      | Permanent catheterization |              |              | 1<br>(100)   | 1<br>(100)    |              |              | 1<br>(100)   |              | 1<br>(100)   |              |              | 1<br>(100)   |              | 1<br>(100)   |              | 1<br>(100)    |   | 1<br>(100)   |               |
|      | Clean catch midstream     | 2<br>(33.33) | 1<br>(16.67) | 3<br>(50)    | 5<br>(83.33)  | 1<br>(16.67) | 5<br>(83.33) | 1<br>(16.67) | 4<br>(66.67) | 2<br>(33.33) | 3<br>(50)    | 1<br>(16.67) | 2<br>(33.33) | 1<br>(16.67) | 5<br>(83.33) | 1<br>(16.67) | 5<br>(83.33)  |   | 6<br>(100)   |               |
|      | Urinary catheter          | 1<br>(25)    | 2<br>(25)    | 2<br>(50)    | 4<br>(100)    |              | 3<br>(100)   |              | 2<br>(50)    | 2<br>(50)    | 1<br>(25)    | 1<br>(25)    | 2<br>(50)    | 1<br>(25)    | 3<br>(75)    |              | 4<br>(100)    |   | 1<br>(25)    | 3<br>(75)     |
|      | Children                  | 1<br>(50)    |              | 1<br>(50)    | 2<br>(100)    |              | 2<br>(100)   |              | 2<br>(100)   |              | 2<br>(100)   |              |              | 1<br>(50)    | 1<br>(50)    | 1<br>(50)    | 1<br>(50)     |   | 2<br>(100)   |               |
|      | Adults                    | 2<br>(66.67) |              | 1<br>(33.33) | 2<br>(66.67)  | 1<br>(33.33) | 2<br>(66.67) | 1<br>(33.33) | 2<br>(66.67) | 1<br>(33.33) | 1<br>(33.33) | 1<br>(33.33) | 1<br>(33.33) | 1<br>(33.33) | 2<br>(66.67) |              | 3<br>(100)    |   | 1<br>(33.33) | 2<br>(66.67)  |
|      | Elderly                   |              | 2<br>(33.33) | 4<br>(66.67) | 6<br>(100)    |              | 4<br>(80)    | 1<br>(20)    | 2<br>(33.33) | 4<br>(66.67) | 1<br>(16.67) | 1<br>(16.67) | 4<br>(66.67) |              | 6<br>(100)   |              | 9<br>(100)    |   | 6<br>(100)   |               |
|      | Outpatient                | 1<br>(50)    |              | 1<br>(50)    | 2<br>(100)    |              | 2<br>(100)   |              | 1<br>(50)    | 1<br>(50)    | 1<br>(50)    |              | 1<br>(50)    |              | 2<br>(100)   |              | 2<br>(100)    |   | 2<br>(100)   |               |
|      | Inpatient                 | 2<br>(22.22) | 2<br>(22.22) | 5<br>(55.56) | 8<br>(88.89)  | 1<br>(11.11) | 6<br>(75)    | 2<br>(25)    | 5<br>(55.56) | 4<br>(44.44) | 3<br>(33.33) | 2<br>(22.22) | 4<br>(44.44) | 2<br>(22.22) | 7<br>(77.78) | 1<br>(11.11) | 8<br>(88.89)  |   | 1<br>(11.11) | 8<br>(88.89)  |
|      | Men                       | 2<br>(33.33) | 2<br>(33.33) | 2<br>(33.33) | 5<br>(83.33)  | 1<br>(16.67) | 4<br>(66.67) | 2<br>(33.33) | 4<br>(66.67) | 2<br>(33.33) | 3<br>(50)    | 1<br>(16.67) | 2<br>(33.33) | 1<br>(16.67) | 5<br>(83.33) | 1<br>(16.67) | 5<br>(83.33)  |   | 6<br>(100)   |               |
|      | Women                     | 1<br>(20)    |              | 4<br>(80)    | 5<br>(100)    |              | 4<br>(100)   |              | 2<br>(40)    | 3<br>(60)    | 1<br>(20)    | 1<br>(20)    | 3<br>(60)    | 1<br>(20)    | 4<br>(80)    |              | 5<br>(100)    |   | 1<br>(20)    | 4<br>(80)     |

TIC= Ticarcillin CXM=Cefuroxime CFM= Cefixime CTX=Cefotaxime CAZ=Ceftazidime FEP=Cefepime IPM=Imipenem TZP=Piperacillin-tazobactam

Table S24: Resistances to non-beta-lactams (%) of *Morganella morganii* in 2016.

|      |                           | TOB          |              |               | GEN          |              |               | NAL           |               | CIP           |              |               | FOF           |              | NIT          |                |              | SXT           |               |
|------|---------------------------|--------------|--------------|---------------|--------------|--------------|---------------|---------------|---------------|---------------|--------------|---------------|---------------|--------------|--------------|----------------|--------------|---------------|---------------|
|      |                           | R            | I            | S             | R            | I            | S             | R             | S             | R             | I            | S             | R             | S            | R            | I              | S            | R             | S             |
| 2016 | Total                     | 2<br>(5.88)  | 2<br>(5.88)  | 30<br>(88.24) | 6<br>(17.65) | 2<br>(5.88)  | 26<br>(76.47) | 14<br>(41.18) | 20<br>(58.82) | 10<br>(29.41) | 3<br>(8.82)  | 21<br>(61.76) | 26<br>(76.47) | 8<br>(23.53) | 6<br>(17.65) | 24<br>(70.59)  | 4<br>(11.76) | 12<br>(35.29) | 22<br>(64.71) |
|      | Collection bag            |              |              | 2<br>(100)    |              | 1<br>(50)    | 1<br>(50)     |               | 2<br>(100)    |               |              | 2<br>(100)    | 2<br>(100)    |              |              | 2<br>(100)     |              | 2<br>(100)    |               |
|      | Permanent catheterization |              |              | 2<br>(100)    |              |              | 2<br>(100)    |               | 2<br>(100)    |               |              | 2<br>(100)    | 2<br>(100)    |              | 1<br>(50)    | 1<br>(50)      |              | 2<br>(100)    |               |
|      | Clean catch midstream     |              | 1<br>(5.88)  | 16<br>(94.12) | 2<br>(11.76) | 1<br>(5.88)  | 14<br>(82.35) | 6<br>(35.29)  | 11<br>(64.71) | 5<br>(29.41)  | 1<br>(5.88)  | 11<br>(64.71) | 13<br>(76.47) | 4<br>(23.53) | 3<br>(17.65) | 12<br>(70.59)  | 2<br>(11.76) | 6<br>(35.29)  | 11<br>(64.71) |
|      | Urinary catheter          | 2<br>(15.38) | 1<br>(7.69)  | 10<br>(76.92) | 4<br>(30.77) |              | 9<br>(69.23)  | 8<br>(61.54)  | 5<br>(38.46)  | 5<br>(38.46)  | 2<br>(15.38) | 6<br>(46.15)  | 9<br>(69.23)  | 4<br>(30.77) | 2<br>(15.38) | 9<br>(69.23)   | 2<br>(15.38) | 6<br>(46.15)  | 7<br>(53.85)  |
|      | Children                  |              |              | 5<br>(100)    |              | 1<br>(20)    | 4<br>(80)     |               | 5<br>(100)    |               |              | 5<br>(100)    | 4<br>(80)     | 1<br>(20)    | 1<br>(20)    | 4<br>(80)      |              | 5<br>(100)    |               |
|      | Adults                    |              | 2<br>(15.38) | 11<br>(84.62) | 2<br>(15.38) |              | 11<br>(84.62) | 6<br>(46.15)  | 7<br>(53.85)  | 6<br>(46.15)  |              | 7<br>(53.85)  | 8<br>(61.54)  | 5<br>(38.46) | 2<br>(15.38) | 8<br>(61.54)   | 3<br>(23.08) | 6<br>(46.15)  | 7<br>(53.85)  |
|      | Elderly                   | 2<br>(12.5)  |              | 14<br>(87.5)  | 4<br>(25)    | 1<br>(6.25)  | 11<br>(68.75) | 8<br>(50)     | 8<br>(50)     | 4<br>(25)     | 3<br>(18.75) | 9<br>(56.25)  | 14<br>(87.5)  | 2<br>(12.5)  | 3<br>(18.75) | 12<br>(75)     | 1<br>(6.25)  | 6<br>(37.5)   | 10<br>(62.5)  |
|      | Outpatient                | 1<br>(4.17)  | 2<br>(8.33)  | 21<br>(87.5)  | 5<br>(20.83) | 1<br>(4.17)  | 18<br>(75)    | 10<br>(41.67) | 14<br>(58.33) | 8<br>(33.33)  | 2<br>(8.33)  | 14<br>(58.33) | 19<br>(79.17) | 5<br>(20.83) | 5<br>(20.83) | 16<br>(66.67)  | 3<br>(12.5)  | 9<br>(37.5)   | 15<br>(62.5)  |
|      | Inpatient                 | 1<br>(10)    |              | 9<br>(90)     | 1<br>(10)    | 1<br>(10)    | 8<br>(80)     | 4<br>(40)     | 6<br>(60)     | 2<br>(20)     | 1<br>(10)    | 7<br>(70)     | 7<br>(70)     | 3<br>(30)    | 1<br>(10)    | 8<br>(80)      | 1<br>(10)    | 3<br>(30)     | 7<br>(70)     |
|      | Men                       |              | 2<br>(10)    | 18<br>(90)    | 4<br>(20)    |              | 16<br>(80)    | 7<br>(35)     | 13<br>(65)    | 6<br>(30)     | 1<br>(5)     | 13<br>(65)    | 14<br>(70)    | 6<br>(30)    | 3<br>(15)    | 14<br>(70)     | 3<br>(15)    | 6<br>(30)     | 14<br>(70)    |
|      | Women                     | 2<br>(14.29) |              | 12<br>(85.71) | 2<br>(14.29) | 2<br>(14.29) | 10<br>(71.43) | 7<br>(50)     | 7<br>(50)     | 4<br>(28.57)  | 2<br>(14.29) | 8<br>(57.14)  | 12<br>(85.71) | 2<br>(14.29) | 3<br>(21.43) | 10<br>(71.43%) | 1<br>(7.14)  | 6<br>(42.86)  | 8<br>(57.14)  |

TOB=Tobramycin GEN=Gentamicin NAL=Nalidixic acid CIP=Ciprofloxacin FOF=Fosfomicin NIT=Nitrofurantoin SXT=Trimethoprim-sulfamethoxazole

Table S25: Resistances to non-beta-lactams (%) of *Morganella morganii* in 2017.

|      |                           | TOB         |             |               | GEN           |               | NAL           |               | CIP           |              |               | FOF           |              | NIT           |               |   | SXT           |               |
|------|---------------------------|-------------|-------------|---------------|---------------|---------------|---------------|---------------|---------------|--------------|---------------|---------------|--------------|---------------|---------------|---|---------------|---------------|
|      |                           | R           | I           | S             | R             | S             | R             | S             | R             | I            | S             | R             | S            | R             | I             | S | R             | S             |
| 2017 | Total                     | 1<br>(2.7)  | 1<br>(2.7)  | 35<br>(94.59) | 11<br>(29.73) | 26<br>(70.27) | 23<br>(67.65) | 11<br>(32.35) | 10<br>(27.03) | 4<br>(10.81) | 23<br>(62.16) | 29<br>(82.86) | 6<br>(17.14) | 17<br>(50)    | 17<br>(50)    |   | 15<br>(40.54) | 22<br>(59.46) |
|      | Permanent catheterization |             |             | 5<br>(100)    | 2<br>(40)     | 3<br>(60)     | 4<br>(100)    |               | 1<br>(20)     |              | 4<br>(80)     | 4<br>(80)     | 1<br>(20)    | 3<br>(75)     | 1<br>(25)     |   | 5<br>(100)    |               |
|      | Clean catch midstream     | 1<br>(3.85) | 1<br>(3.85) | 24<br>(92.31) | 6<br>(23.08)  | 20<br>(76.92) | 14<br>(58.33) | 10<br>(41.67) | 4<br>(15.38)  | 4<br>(15.38) | 18<br>(69.23) | 19<br>(79.17) | 5<br>(20.83) | 9<br>(37.5)   | 15<br>(62.5)  |   | 10<br>(38.46) | 16<br>(61.54) |
|      | Urinary catheter          |             |             | 6<br>(100)    | 3<br>(50)     | 3<br>(50)     | 5<br>(83.33)  | 1<br>(16.67)  | 5<br>(83.33)  |              | 1<br>(16.67)  | 6<br>(100)    |              | 5<br>(83.33)  | 1<br>(16.67)  |   | 6<br>(100)    |               |
|      | Children                  |             |             | 3<br>(100)    |               | 3<br>(100)    |               | 3<br>(100)    |               |              | 3<br>(100)    | 2<br>(66.67)  | 1<br>(33.33) |               | 3<br>(100)    |   | 3<br>(100)    |               |
|      | Adults                    |             |             | 6<br>(100)    | 1<br>(16.67)  | 5<br>(83.33)  | 3<br>(60)     | 2<br>(40)     |               |              | 6<br>(100)    | 5<br>(100)    |              | 1<br>(20)     | 4<br>(80)     |   | 4<br>(66.67)  | 2<br>(33.33)  |
|      | Elderly                   | 1<br>(3.57) | 1<br>(3.57) | 26<br>(92.86) | 10<br>(35.71) | 18<br>(64.29) | 20<br>(76.92) | 6<br>(23.08)  | 10<br>(35.71) | 4<br>(14.29) | 14<br>(50)    | 22<br>(81.48) | 5<br>(18.52) | 16<br>(61.54) | 10<br>(38.46) |   | 11<br>(39.29) | 17<br>(60.71) |
|      | Outpatient                | 1<br>(6.25) |             | 15<br>(93.75) | 6<br>(37.5)   | 10<br>(62.5)  | 12<br>(75)    | 4<br>(25)     | 5<br>(31.25)  | 2<br>(12.5)  | 9<br>(56.25)  | 13<br>(81.25) | 3<br>(18.75) | 8<br>(50)     | 8<br>(50)     |   | 6<br>(37.5)   | 10<br>(62.5)  |
|      | Inpatient                 |             | 1<br>(4.76) | 20<br>(95.24) | 5<br>(23.81)  | 16<br>(76.19) | 11<br>(61.11) | 7<br>(38.89)  | 5<br>(23.81)  | 2<br>(9.52)  | 14<br>(66.67) | 15<br>(83.33) | 3<br>(16.67) | 9<br>(50)     | 9<br>(50)     |   | 9<br>(42.86)  | 12<br>(57.14) |
|      | Men                       | 1<br>(5)    | 1<br>(5)    | 18<br>(90)    | 7<br>(35)     | 13<br>(65)    | 13<br>(68.42) | 6<br>(31.58)  | 6<br>(30)     | 3<br>(15)    | 11<br>(55)    | 18<br>(90)    | 2<br>(10)    | 10<br>(52.63) | 9<br>(47.37)  |   | 10<br>(50)    | 10<br>(50)    |
|      | Women                     |             |             | 17<br>(100)   | 4<br>(23.53)  | 13<br>(76.47) | 10<br>(66.67) | 5<br>(33.33)  | 4<br>(29.41)  | 1<br>(5.88)  | 12<br>(70.59) | 11<br>(73.33) | 4<br>(26.67) | 7<br>(46.67)  | 8<br>(53.33)  |   | 5<br>(29.41)  | 12<br>(70.59) |

TOB=Tobramycin GEN=Gentamicin NAL=Nalidixic acid CIP=Ciprofloxacin FOF=Fosfomycin NIT=Nitrofurantoin SXT=Trimethoprim-sulfamethoxazole



Table S26: Resistances to non-beta-lactams (%) of *Morganella morganii* in 2018.

|      |                           | TOB          |               | GEN          |               | NAL           |               | CIP          |              |               | FOF           |              | NIT           |               |   | SXT          |               |
|------|---------------------------|--------------|---------------|--------------|---------------|---------------|---------------|--------------|--------------|---------------|---------------|--------------|---------------|---------------|---|--------------|---------------|
|      |                           | R            | S             | R            | S             | R             | S             | R            | I            | S             | R             | S            | R             | I             | S | R            | S             |
| 2018 | Total                     | 2<br>(6.89)  | 27<br>(93.1)  | 6<br>(20.69) | 23<br>(79.31) | 13<br>(44.83) | 16<br>(55.17) | 4<br>(13.79) | 3<br>(10.34) | 22<br>(75.86) | 21<br>(72.41) | 8<br>(27.59) | 12<br>(41.38) | 17<br>(58.62) |   | 7<br>(24.14) | 22<br>(75.86) |
|      | Permanent catheterization |              | 9<br>(100)    | 1<br>(11.11) | 8<br>(88.89)  | 5<br>(55.56)  | 4<br>(44.44)  | 2<br>(22.22) | 1<br>(11.11) | 6<br>(66.67)  | 7<br>(77.78)  | 2<br>(22.22) | 5<br>(55.56)  | 4<br>(44.44)  |   | 3<br>(33.33) | 6<br>(66.67)  |
|      | Clean catch midstream     | 2<br>(11.11) | 16<br>(88.89) | 4<br>(22.22) | 14<br>(77.78) | 7<br>(38.89)  | 11<br>(61.11) | 1<br>(5.56)  | 2<br>(11.11) | 15<br>(83.33) | 12<br>(66.67) | 6<br>(33.33) | 7<br>(38.89)  | 11<br>(61.11) |   | 4<br>(22.22) | 14<br>(77.78) |
|      | Urinary catheter          |              | 2<br>(100)    | 1<br>(50)    | 1<br>(50)     | 1<br>(50)     | 1<br>(50)     | 1<br>(50)    |              | 1<br>(50)     | 2<br>(100)    |              |               | 2<br>(100)    |   |              | 2<br>(100)    |
|      | Children                  |              | 1<br>(100)    |              | 1<br>(100)    |               | 1<br>(100)    |              |              | 1<br>(100)    | 1<br>(100)    |              |               | 1<br>(100)    |   |              | 1<br>(100)    |
|      | Adults                    | 2<br>(20)    | 8<br>(80)     | 2<br>(25)    | 6<br>(75)     | 3<br>(37.5)   | 5<br>(62.5)   | 2<br>(25)    |              | 6<br>(75)     | 6<br>(75)     | 2<br>(25)    | 4<br>(50)     | 4<br>(50)     |   | 2<br>(25)    | 6<br>(75)     |
|      | Elderly                   |              | 18<br>(100)   | 4<br>(20)    | 16<br>(80)    | 10<br>(50)    | 10<br>(50)    | 2<br>(10)    | 3<br>(15)    | 15<br>(75)    | 14<br>(70)    | 6<br>(30)    | 8<br>(40)     | 12<br>(60)    |   | 5<br>(25)    | 15<br>(75)    |
|      | Outpatient                | 1<br>(14.29) | 6<br>(85.71)  | 2<br>(28.57) | 5<br>(71.43)  | 1<br>(14.29)  | 6<br>(85.71)  |              |              | 7<br>(100)    | 6<br>(85.71)  | 1<br>(14.29) | 3<br>(42.86)  | 4<br>(57.14)  |   | 2<br>(28.57) | 5<br>(71.43)  |
|      | Inpatient                 | 1<br>(4.55)  | 21<br>(95.45) | 4<br>(18.18) | 18<br>(81.82) | 12<br>(54.55) | 10<br>(45.45) | 4<br>(18.18) | 3<br>(13.64) | 15<br>(68.18) | 15<br>(68.18) | 7<br>(31.82) | 9<br>(40.91)  | 13<br>(59.09) |   | 5<br>(22.73) | 17<br>(77.27) |
|      | Men                       | 1<br>(6.25)  | 15<br>(93.75) | 5<br>(31.25) | 11<br>(68.75) | 8<br>(50)     | 8<br>(50)     | 3<br>(18.75) | 2<br>(12.5)  | 11<br>(68.75) | 12<br>(75)    | 4<br>(25)    | 7<br>(43.75)  | 9<br>(56.25)  |   | 4<br>(25)    | 12<br>(75)    |
|      | Women                     | 1<br>(7.69)  | 12<br>(92.31) | 1<br>(7.69)  | 12<br>(92.31) | 5<br>(38.46)  | 8<br>(61.54)  | 1<br>(7.69)  | 1<br>(7.69)  | 11<br>(84.62) | 9<br>(69.23)  | 4<br>(30.77) | 5<br>(38.46)  | 8<br>(61.54)  |   | 3<br>(23.08) | 10<br>(76.92) |

TOB=Tobramycin GEN=Gentamicin NAL=Nalidixic acid CIP=Ciprofloxacin FOF=Fosfomycin NIT=Nitrofurantoin SXT=Trimethoprim-sulfamethoxazole

Table S27: Resistances to non-beta-lactams (%) of *Morganella morganii* in 2019.

|      |                           | TOB    |         |   | GEN     |         | NAL     |         | CIP     |         |         | FOF     |         | NIT     |         |   | SXT     |        |         |
|------|---------------------------|--------|---------|---|---------|---------|---------|---------|---------|---------|---------|---------|---------|---------|---------|---|---------|--------|---------|
|      |                           | R      | I       | S | R       | S       | R       | S       | R       | I       | S       | R       | S       | R       | I       | S | R       | I      | S       |
| 2019 | Total                     | 2      | 29      |   | 4       | 27      | 13      | 17      | 7       | 2       | 22      | 26      | 4       | 23      | 7       |   | 9       | 1      | 21      |
|      |                           | (6.45) | (93.55) |   | (12.9)  | (87.09) | (43.33) | (56.67) | (22.58) | (6.45)  | (70.97) | (86.67) | (13.33) | (76.67) | (23.33) |   | (29.03) | (3.23) | (67.74) |
|      | Permanent catheterization | 1      | 3       |   | 2       | 2       | 2       | 2       |         |         | 4       | 3       | 1       | 1       | 3       |   | 3       |        | 1       |
|      |                           | (25)   | (75)    |   | (50)    | (50)    | (50)    | (50)    |         |         | (100)   | (75)    | (25)    | (25)    | (75)    |   | (75)    |        | (25)    |
|      | Clean catch midstream     | 1      | 16      |   | 2       | 15      | 10      | 7       | 7       | 1       | 9       | 14      | 3       | 14      | 3       |   | 4       | 1      | 12      |
|      |                           | (5.88) | (94.12) |   | (11.76) | (88.24) | (58.82) | (41.18) | (41.18) | (5.88)  | (52.94) | (82.35) | (17.65) | (82.35) | (17.65) |   | (23.53) | (5.88) | (70.59) |
|      | Urinary catheter          |        | 10      |   |         | 10      | 1       | 8       |         | 1       | 9       | 9       |         | 8       | 1       |   | 2       |        | 8       |
|      |                           |        | (100)   |   |         | (100)   | (11.11) | (88.89) |         | (10)    | (90)    | (100)   |         | (88.89) | (11.11) |   | (20)    |        | (80)    |
|      | Children                  |        | 3       |   |         | 3       | 1       | 2       |         |         | 3       | 3       |         | 2       | 1       |   | 1       |        | 2       |
|      |                           |        | (100)   |   |         | (100)   | (33.33) | (66.67) |         |         | (100)   | (100)   |         | (66.67) | (33.33) |   | (33.33) |        | (66.67) |
|      | Adults                    |        | 8       |   |         | 8       | 3       | 5       | 2       |         | 6       | 5       | 3       | 7       | 1       |   |         |        | 8       |
|      |                           |        | (100)   |   |         | (100)   | (37.5)  | (62.5)  | (25)    |         | (75)    | (62.5)  | (37.5)  | (87.5)  | (12.5)  |   |         |        | (100)   |
|      | Elderly                   | 2      | 18      |   | 4       | 16      | 9       | 10      | 5       | 2       | 13      | 18      | 1       | 14      | 5       |   | 8       | 1      | 11      |
|      |                           | (10)   | (90)    |   | (20)    | (80)    | (47.37) | (52.63) | (25)    | (10)    | (65)    | (94.74) | (5.26)  | (73.68) | (26.32) |   | (40)    | (5)    | (55)    |
|      | Outpatient                | 1      | 14      |   | 2       | 13      | 8       | 6       | 6       | 2       | 7       | 13      | 1       | 12      | 2       |   | 5       |        | 10      |
|      |                           | (6.67) | (93.33) |   | (13.33) | (86.67) | (57.14) | (42.86) | (40)    | (13.33) | (46.67) | (92.86) | (7.14)  | (85.71) | (14.29) |   | (33.33) |        | (66.67) |
|      | Inpatient                 | 1      | 15      |   | 2       | 14      | 5       | 11      | 1       |         | 15      | 13      | 3       | 11      | 5       |   | 4       | 1      | 11      |
|      |                           | (6.25) | (93.75) |   | (12.5)  | (87.5)  | (31.25) | (68.75) | (6.25)  |         | (93.75) | (81.25) | (18.75) | (68.75) | (31.25) |   | (25)    | (6.25) | (68.75) |
|      | Men                       | 1      | 16      |   | 2       | 15      | 7       | 10      | 5       |         | 12      | 14      | 3       | 14      | 3       |   | 4       |        | 13      |
|      |                           | (5.88) | (94.12) |   | (11.76) | (88.24) | (41.18) | (58.82) | (29.41) |         | (70.59) | (82.35) | (17.65) | (82.35) | (17.65) |   | (23.53) |        | (76.47) |
|      | Women                     | 1      | 13      |   | 2       | 12      | 6       | 7       | 2       | 2       | 10      | 12      | 1       | 9       | 4       |   | 5       | 1      | 8       |
|      |                           | (7.14) | (92.86) |   | (14.29) | (85.71) | (46.15) | (53.85) | (14.29) | (14.29) | (71.43) | (92.31) | (7.69)  | (69.23) | (30.77) |   | (35.71) | (7.14) | (57.14) |

TOB=Tobramycin GEN=Gentamicin NAL=Nalidixic acid CIP=Ciprofloxacin FOF=Fosfomycin NIT=Nitrofurantoin SXT=Trimethoprim-sulfamethoxazole

Table S28: Resistances to non-beta-lactams (%) of *Morganella morganii* in 2020.

|      |                           | TOB          |              |               | GEN          |             |               | NAL           |               | CIP           |               | FOF           |              | NIT         |   | SXT           |             |               |
|------|---------------------------|--------------|--------------|---------------|--------------|-------------|---------------|---------------|---------------|---------------|---------------|---------------|--------------|-------------|---|---------------|-------------|---------------|
|      |                           | R            | I            | S             | R            | I           | S             | R             | S             | R             | S             | R             | S            | R           | S | R             | I           | S             |
| 2020 | Total                     | 6<br>(23.08) | 2<br>(7.69)  | 18<br>(69.23) | 8<br>(30.77) | 1<br>(3.85) | 17<br>(65.38) | 12<br>(46.15) | 14<br>(53.85) | 11<br>(42.31) | 15<br>(57.69) | 23<br>(88.46) | 3<br>(11.54) | 25<br>(100) |   | 11<br>(42.31) | 1<br>(3.85) | 14<br>(53.85) |
|      | Permanent catheterization | 1<br>(25)    |              | 3<br>(75)     | 2<br>(50)    |             | 2<br>(50)     | 2<br>(50)     | 2<br>(50)     | 2<br>(50)     | 2<br>(50)     | 4<br>(100)    |              | 4<br>(100)  |   | 1<br>(25)     | 1<br>(25)   | 2<br>(50)     |
|      | Clean catch midstream     | 3<br>(25)    | 1<br>(8.33)  | 8<br>(66.67)  | 4<br>(25)    |             | 8<br>(75)     | 7<br>(58.33)  | 5<br>(41.67)  | 6<br>(50)     | 6<br>(50)     | 11<br>(91.67) | 1<br>(8.33)  | 12<br>(100) |   | 7<br>(58.33)  |             | 5<br>(41.67)  |
|      | Urinary catheter          | 2<br>(20)    | 1<br>(10)    | 7<br>(70)     | 2<br>(20)    | 1<br>(10)   | 7<br>(70)     | 3<br>(30)     | 7<br>(70)     | 3<br>(30)     | 7<br>(70)     | 8<br>(80)     | 2<br>(20)    | 9<br>(100)  |   | 3<br>(30)     |             | 7<br>(70)     |
|      | Children                  |              |              | 1<br>(100)    |              |             | 1<br>(100)    |               | 1<br>(100)    |               | 1<br>(100)    | 1<br>(100)    |              | 1<br>(100)  |   |               |             | 1<br>(100)    |
|      | Adults                    |              |              | 5<br>(100)    |              |             | 5<br>(100)    | 1<br>(20)     | 4<br>(80)     |               | 5<br>(100)    | 5<br>(100)    |              | 5<br>(100)  |   |               |             | 5<br>(100)    |
|      | Elderly                   | 6<br>(30)    | 2<br>(10)    | 12<br>(60)    | 8<br>(40)    | 1<br>(5)    | 11<br>(55)    | 11<br>(55)    | 9<br>(45)     | 11<br>(55)    | 9<br>(45)     | 17<br>(85)    | 3<br>(15)    | 19<br>(100) |   | 11<br>(55)    | 1<br>(5)    | 8<br>(40)     |
|      | Outpatient                | 3<br>(23.08) |              | 10<br>(76.92) | 4<br>(30.77) |             | 9<br>(69.23)  | 6<br>(46.15)  | 7<br>(53.85)  | 6<br>(46.15)  | 7<br>(53.85)  | 11<br>(84.62) | 2<br>(15.38) | 12<br>(100) |   | 7<br>(53.85)  | 1<br>(7.69) | 5<br>(38.46)  |
|      | Inpatient                 | 3<br>(23.08) | 2<br>(15.38) | 8<br>(61.54)  | 4<br>(30.77) | 1<br>(7.69) | 8<br>(61.54)  | 6<br>(46.15)  | 7<br>(53.85)  | 5<br>(38.46)  | 8<br>(61.54)  | 12<br>(92.31) | 1<br>(7.69)  | 13<br>(100) |   | 4<br>(30.77)  |             | 9<br>(69.23)  |
|      | Men                       | 2<br>(13.33) | 1<br>(6.67)  | 12<br>(80)    | 4<br>(26.67) |             | 11<br>(73.33) | 6<br>(40)     | 9<br>(60)     | 5<br>(33.33)  | 10<br>(66.67) | 13<br>(86.67) | 2<br>(13.33) | 14<br>(100) |   | 6<br>(40)     |             | 9<br>(60)     |
|      | Women                     | 4<br>(36.36) | 1<br>(9.09)  | 6<br>(54.55)  | 4<br>(36.36) | 1<br>(9.09) | 6<br>(54.55)  | 6<br>(54.55)  | 5<br>(45.45)  | 6<br>(54.55)  | 5<br>(45.45)  | 10<br>(90.91) | 1<br>(9.09)  | 11<br>(100) |   | 5<br>(45.45)  | 1<br>(9.09) | 5<br>(45.45)  |

TOB=Tobramycin GEN=Gentamicin NAL=Nalidixic acid CIP=Ciprofloxacin FOF=Fosfomicin NIT=Nitrofurantoin SXT=Trimethoprim-sulfamethoxazole

Table S29: Resistances to non-beta-lactams (%) of *Morganella morganii* in 2021.

|      |                           | TOB          |              | GEN          |              | NAL          |              | CIP          |              | FOF          |              | NIT         |   | SXT          |              |
|------|---------------------------|--------------|--------------|--------------|--------------|--------------|--------------|--------------|--------------|--------------|--------------|-------------|---|--------------|--------------|
|      |                           | R            | S            | R            | S            | R            | S            | R            | S            | R            | S            | R           | S | R            | S            |
| 2021 | Total                     | 2<br>(18.18) | 9<br>(81.82) | 2<br>(18.18) | 9<br>(81.82) | 2<br>(18.18) | 9<br>(81.82) | 3<br>(27.27) | 8<br>(72.73) | 8<br>(72.73) | 3<br>(27.27) | 11<br>(100) |   | 2<br>(18.18) | 9<br>(81.82) |
|      | Permanent catheterization |              | 1<br>(100)   |              | 1<br>(100)   |              | 1<br>(100)   |              | 1<br>(100)   | 1<br>(100)   |              | 1<br>(100)  |   |              | 1<br>(100)   |
|      | Clean catch midstream     |              | 6<br>(100)   |              | 6<br>(100)   |              | 6<br>(100)   | 1<br>(16.67) | 5<br>(83.33) | 4<br>(66.67) | 2<br>(33.33) | 6<br>(100)  |   |              | 6<br>(100)   |
|      | Urinary catheter          | 2<br>(50)    | 3<br>(75)    | 1<br>(25)    | 4<br>(100)  |   | 2<br>(50)    | 2<br>(50)    |
|      | Children                  |              | 2<br>(100)   |              | 2<br>(100)   |              | 2<br>(100)   | 1<br>(50)    | 1<br>(50)    | 2<br>(100)   |              | 2<br>(100)  |   |              | 2<br>(100)   |
|      | Adults                    | 1<br>(33.33) | 2<br>(66.67) | 3<br>(100)  |   | 1<br>(33.33) | 2<br>(66.67) |
|      | Elderly                   | 1<br>(16.67) | 5<br>(83.33) | 1<br>(16.67) | 5<br>(83.33) | 1<br>(16.67) | 5<br>(83.33) | 1<br>(16.67) | 5<br>(83.33) | 5<br>(83.33) | 1<br>(16.67) | 6<br>(100)  |   | 1<br>(16.67) | 5<br>(83.33) |
|      | Outpatient                |              | 2<br>(100)   |              | 2<br>(100)   |              | 2<br>(100)   | 1<br>(50)    | 1<br>(50)    | 1<br>(50)    | 1<br>(50)    | 2<br>(100)  |   |              | 2<br>(100)   |
|      | Inpatient                 | 2<br>(22.22) | 7<br>(77.78) | 2<br>(22.22) | 7<br>(77.78) | 2<br>(22.22) | 7<br>(77.78) | 2<br>(22.22) | 7<br>(77.78) | 7<br>(77.78) | 2<br>(22.22) | 9<br>(100)  |   | 2<br>(22.22) | 7<br>(77.78) |
|      | Men                       |              | 6<br>(100)   |              | 6<br>(100)   |              | 6<br>(100)   | 2<br>(33.33) | 4<br>(66.67) | 5<br>(83.33) | 1<br>(16.67) | 6<br>(100)  |   | 1<br>(16.67) | 5<br>(83.33) |
|      | Women                     | 2<br>(40)    | 3<br>(60)    | 2<br>(40)    | 3<br>(60)    | 2<br>(40)    | 3<br>(60)    | 1<br>(20)    | 4<br>(80)    | 3<br>(60)    | 2<br>(40)    | 5<br>(100)  |   | 1<br>(20)    | 4<br>(80)    |

TOB=Tobramycin GEN=Gentamicin NAL=Nalidixic acid CIP=Ciprofloxacin FOF=Fosfomycin NIT=Nitrofurantoin SXT=Trimethoprim-sulfamethoxazole

Table S30: Systematic review of the resistance rates (%) of *Klebsiella aerogenes* in urine cultures

| Author (year of publication)           | Period    | Place   | N   | CAZ   | FEP  | CRO | C-T  | IPM | I-R | MEM | ETP | DOR | TZP   | AMK  | TOB | ATM  | GEN | NAL | NIT | FOF   | CIP   | LVX  | SXT | CST  |
|----------------------------------------|-----------|---------|-----|-------|------|-----|------|-----|-----|-----|-----|-----|-------|------|-----|------|-----|-----|-----|-------|-------|------|-----|------|
| H. Seifert (2018) <sup>17</sup>        | 2014-2015 | Germany | 14  | 50    | 21.4 | 50  | 42.9 |     |     | 0   | 7.1 | 7.1 | 50    | 0    | 0   |      |     |     |     | 35.7  | 14.3  | 14.3 |     | 0    |
| S. Lob (2020) <sup>18</sup>            | 2015-2017 | Europe  | 106 | 30.2  | 1.9  |     |      | 0.9 | 0.9 |     |     |     | 26.4  | 1.9  |     | 29.2 |     |     |     |       | 6.6   |      |     | 3.8  |
| G. Jiménez Guerra (2020) <sup>19</sup> | 2006-2016 | Spain   | 150 |       | 5    |     |      | 12  |     |     |     |     | 18    |      | 7   |      | 6   | 14  | 47  | 13    | 8     |      | 7   |      |
| Weighted averages                      |           |         | 270 | 32.51 | 4.63 | 50  | 42.9 | 7.4 | 0.9 | 0   | 7.1 | 7.1 | 22.96 | 1.68 | 6.4 | 29.2 | 6   | 14  | 47  | 14.94 | 42.27 | 14.3 | 7   | 3.36 |

CAZ=Ceftazidime FEP=Cefepime CRO=Ceftriaxone CT=Ceftolozane-tazobactam IPM=Imipenem I-R=Imipenem-relebactam MEM=Meropenem ETP=Ertapenem DOR=Doripenem TZP=Piperacilin-tazobactam AMK=Amikacin TOB=Tobramycin ATM=Aztreonam GEN=Gentamicin NAL=Nalidixic acid NIT=Nitrofurantoin FOF=Fosfomycin CIP=Ciprofloxacin LVX=Levofloxacin SXT=Trimethoprim-sulfamethoxazole CST=Colistin

Table S31: General annualized resistances (%) of *Klebsiella aerogenes* during 2016-2021

|              | AMC              | AMP              | TIC              | CXM               | FOX              | CFM              | CTX               | CAZ               | FEP             | IPM             | ETP            | TZP               | AMK         | TOB             | GEN             | NAL               | CIP              | LVX             | FOF               | NIT               | SXT             | CST             |
|--------------|------------------|------------------|------------------|-------------------|------------------|------------------|-------------------|-------------------|-----------------|-----------------|----------------|-------------------|-------------|-----------------|-----------------|-------------------|------------------|-----------------|-------------------|-------------------|-----------------|-----------------|
| <b>2016</b>  | 23/23<br>(100)   | 23/23<br>(100)   | -                | 10/22<br>(45.45)  | 23/23<br>(100)   | -                | 7/23<br>(30.43)   | 7/23<br>(30.43)   | 1/23<br>(4.35)  | 1/23<br>(4.35)  | 2/3<br>(66.67) | 1/23<br>(4.35)    | -           | 1/23<br>(4.35)  | 1/23<br>(4.35)  | 4/23<br>(17.39)   | 2/23<br>(8.69)   | -               | 3/23<br>(13.04)   | 6/23<br>(26.09)   | 1/23<br>(4.35)  | -               |
| <b>2017</b>  | 24/24<br>(100)   | 24/24<br>(100)   | -                | 4/23<br>(17.39)   | 24/24<br>(100)   | -                | 5/24<br>(20.83)   | 3/24<br>(12.5)    | 1/24<br>(4.17)  | 5/24<br>(20.83) | 1/4<br>(25)    | 2/24<br>(8.33)    | -           | 1/24<br>(4.17)  | 1/24<br>(4.17)  | 2/24<br>(8.33)    | 1/24<br>(4.17)   | -               | 5/24<br>(20.83)   | 2/24<br>(8.33)    | 1/24<br>(4.17)  | -               |
| <b>2018</b>  | 21/21<br>(100)   | 21/21<br>(100)   | -                | 9/21<br>(42.86)   | 21/21<br>(100)   | -                | 8/21<br>(38.09)   | 8/21<br>(38.09)   | 0/21<br>(0)     | 0/19<br>(0)     | -              | 0/21<br>(0)       | -           | 0/21<br>(0)     | 0/21<br>(0)     | 1/21<br>(4.76)    | 1/21<br>(4.76)   | -               | 4/21<br>(19.05)   | 1/21<br>(4.76)    | 0/21<br>(0)     | -               |
| <b>2019</b>  | 37/37<br>(100)   | 37/37<br>(100)   | 15/30<br>(50)    | 10/37<br>(27.03)  | 37/37<br>(100)   | 10/29<br>(34.48) | 9/36<br>(25)      | 10/37<br>(27.03)  | 3/36<br>(8.33)  | 1/37<br>(2.7)   | 2/30<br>(6.67) | 3/37<br>(8.11)    | 0/30<br>(0) | 2/37<br>(5.41)  | 3/37<br>(8.11)  | 7/37<br>(18.92)   | 5/37<br>(13.51)  | 4/30<br>(13.33) | 7/37<br>(18.92)   | 6/30<br>(20)      | 4/37<br>(10.81) | 6/30<br>(20)    |
| <b>2020</b>  | 23/23<br>(100)   | 23/23<br>(100)   | 13/23<br>(56.52) | 12/23<br>(52.17)  | 23/23<br>(100)   | 11/23<br>(47.83) | 10/23<br>(43.48)  | 10/23<br>(43.48)  | 3/23<br>(13.04) | 1/23<br>(4.35)  | 1/23<br>(4.35) | 8/23<br>(34.78)   | 0/23<br>(0) | 1/23<br>(4.35)  | 1/23<br>(4.35)  | 4/23<br>(17.39)   | 3/23<br>(13.04)  | 3/23<br>(13.04) | 6/23<br>(26.09)   | 5/19<br>(26.32)   | 1/23<br>(4.35)  | 1/23<br>(4.35)  |
| <b>2021</b>  | 13/13<br>(100)   | 13/13<br>(100)   | 2/13<br>(15.38)  | 2/13<br>(15.38)   | 12/12<br>(100)   | 2/13<br>(15.38)  | 2/13<br>(15.38)   | 2/13<br>(15.38)   | 1/13<br>(7.69)  | 0/13<br>(0)     | 0/13<br>(0)    | 1/13<br>(7.69)    | 0/13<br>(0) | 0/13<br>(0)     | 0/13<br>(0)     | 0/13<br>(0)       | 0/13<br>(0)      | 0/13<br>(0)     | 1/13<br>(7.69)    | 1/13<br>(7.69)    | 0/13<br>(0)     | 1/13<br>(7.69)  |
| <b>Total</b> | 141/141<br>(100) | 141/141<br>(100) | 30/66<br>(45.45) | 47/139<br>(33.81) | 141/140<br>(100) | 23/65<br>(35.38) | 41/140<br>(29.29) | 40/141<br>(28.37) | 9/140<br>(6.43) | 8/139<br>(5.75) | 6/73<br>(8.22) | 15/141<br>(10.64) | 0/63<br>(0) | 5/141<br>(3.55) | 6/141<br>(4.25) | 18/141<br>(12.77) | 12/141<br>(8.51) | 7/70<br>(10)    | 26/141<br>(18.44) | 21/130<br>(16.15) | 7/141<br>(4.96) | 8/66<br>(12.12) |

AMC=Amoxicillin-clavulanic; AMP=Ampicillin; TIC=Ticarcillin; CXM=Cefuroxime; FOX=Cefoxitin; CFM=Cefixime; CTX=Cefotaxime; CAZ=Ceftazidime; FEP=Cefepime; IPM=Imipenem; ETP=Ertapenem; TZP=Piperacillin-tazobactam; AMK: amikacin; TOB=Tobramycin; GEN=Gentamicin; NAL=Nalidixic acid; LVX=Levofloxacin; FOF=Fosfomycin NIT=Nitrofurantoin; SXT=Trimethoprim-sulfamethoxazole; CST=Colistin

Table S32: Resistances to beta-lactams (%) of *Klebsiella aerogenes* in 2016.

|      |                           | AMC         |   | AMP         |   | CXM           |              |               | FOX         |   | CTX          |              |               | CAZ          |   |               | FEP         |               | IPM         |               | ETP          |              | TZP         |              |               |
|------|---------------------------|-------------|---|-------------|---|---------------|--------------|---------------|-------------|---|--------------|--------------|---------------|--------------|---|---------------|-------------|---------------|-------------|---------------|--------------|--------------|-------------|--------------|---------------|
|      |                           | R           | S | R           | S | R             | I            | S             | R           | S | R            | I            | S             | R            | I | S             | R           | S             | R           | S             | R            | S            | R           | I            | S             |
| 2016 | Total                     | 23<br>(100) |   | 23<br>(100) |   | 10<br>(45.45) | 2<br>(9.09)  | 10<br>(45.45) | 23<br>(100) |   | 7<br>(30.43) | 1<br>(4.35)  | 15<br>(65.22) | 7<br>(30.43) |   | 16<br>(69.57) | 1<br>(4.35) | 22<br>(95.65) | 1<br>(4.35) | 22<br>(95.65) | 2<br>(66.67) | 1<br>(33.33) | 1<br>(4.35) | 5<br>(21.74) | 17<br>(73.91) |
|      | Nephrostomy catheter      |             |   |             |   |               |              |               |             |   |              |              |               |              |   |               |             |               |             |               |              |              |             |              |               |
|      | Permanent catheterization | 3<br>(100)  |   | 3<br>(100)  |   | 1<br>(33.33)  |              | 2<br>(66.67)  | 3<br>(100)  |   | 1<br>(33.33) |              | 2<br>(66.67)  | 1<br>(33.33) |   | 2<br>(66.67)  | 3<br>(100)  |               | 3<br>(100)  |               |              |              |             |              | 3<br>(100)    |
|      | Clean catch midstream     | 14<br>(100) |   | 14<br>(100) |   | 7<br>(53.85)  |              | 6<br>(46.15)  | 14<br>(100) |   | 9<br>(64.29) | 1<br>(7.14)  | 4<br>(28.57)  | 4<br>(28.57) |   | 10<br>(71.43) | 1<br>(7.14) | 13<br>(92.86) | 1<br>(7.14) | 13<br>(92.86) | 1<br>(50)    | 1<br>(50)    | 1<br>(7.14) | 3<br>(21.43) | 10<br>(71.43) |
|      | Urinary catheter          | 6<br>(100)  |   | 6<br>(100)  |   | 2<br>(33.33)  | 2<br>(33.33) | 2<br>(33.33)  | 6<br>(100)  |   | 2<br>(33.33) |              | 4<br>(66.67)  | 2<br>(33.33) |   | 4<br>(66.67)  | 6<br>(100)  |               | 6<br>(100)  |               | 1<br>(100)   |              |             | 2<br>(33.33) | 4<br>(66.67)  |
|      | Children                  | 2<br>(100)  |   | 2<br>(100)  |   | 1<br>(50)     |              | 1<br>(50)     | 2<br>(100)  |   |              |              | 2<br>(100)    |              |   | 2<br>(100)    | 2<br>(100)  |               | 2<br>(100)  |               |              |              |             |              | 2<br>(100)    |
|      | Adults                    | 11<br>(100) |   | 11<br>(100) |   | 6<br>(54.55)  |              | 5<br>(45.45)  | 11<br>(100) |   | 5<br>(45.45) |              | 6<br>(54.55)  | 5<br>(45.45) |   | 6<br>(54.55)  | 1<br>(9.09) | 10<br>(90.91) | 1<br>(9.09) | 10<br>(90.91) | 1<br>(50)    | 1<br>(50)    | 1<br>(9.09) | 3<br>(27.27) | 7<br>(63.64)  |
|      | Elderly                   | 10<br>(100) |   | 10<br>(100) |   | 3<br>(33.33)  | 2<br>(22.22) | 4<br>(44.44)  | 10<br>(100) |   | 2<br>(20)    | 1<br>(10)    | 7<br>(70)     | 2<br>(20)    |   | 8<br>(80)     | 10<br>(100) |               | 10<br>(100) |               | 1<br>(100)   |              |             | 2<br>(20)    | 8<br>(80)     |
|      | Outpatient                | 17<br>(100) |   | 17<br>(100) |   | 8<br>(50)     | 2<br>(12.5)  | 6<br>(37.5)   | 17<br>(100) |   | 5<br>(29.41) |              | 12<br>(70.59) | 5<br>(29.41) |   | 12<br>(70.59) | 1<br>(5.88) | 16<br>(94.12) | 1<br>(5.88) | 16<br>(94.12) | 1<br>(50)    | 1<br>(50)    | 1<br>(5.88) | 3<br>(17.65) | 13<br>(76.47) |
|      | Inpatient                 | 6<br>(100)  |   | 6<br>(100)  |   | 2<br>(33.33)  |              | 4<br>(66.67)  | 6<br>(100)  |   | 2<br>(33.33) | 1<br>(16.67) | 3<br>(50)     | 2<br>(33.33) |   | 4<br>(66.67)  | 6<br>(100)  |               | 6<br>(100)  |               | 1<br>(100)   |              |             | 2<br>(33.33) | 4<br>(66.67)  |
|      | Men                       | 11<br>(100) |   | 11<br>(100) |   | 5<br>(50)     |              | 5<br>(50)     | 11<br>(100) |   | 4<br>(36.36) |              | 7<br>(63.64)  | 4<br>(36.36) |   | 7<br>(63.64)  | 1<br>(9.09) | 10<br>(90.91) |             | 11<br>(100)   | 1<br>(50)    | 1<br>(50)    | 1<br>(9.09) | 2<br>(18.18) | 8<br>(72.73)  |
|      | Women                     | 12<br>(100) |   | 12<br>(100) |   | 5<br>(41.67)  | 2<br>(16.67) | 5<br>(41.67)  | 12<br>(100) |   | 3<br>(25)    | 1<br>(8.33)  | 8<br>(66.67)  | 3<br>(25)    |   | 9<br>(75)     | 12<br>(100) |               | 1<br>(8.33) | 11<br>(91.67) | 1<br>(100)   |              |             | 3<br>(25)    | 9<br>(75)     |

AMC= Amoxicillin-clavulanic AMP=Ampicillin CXM=Cefuroxime FOX=Cefoxitin CTX=Cefotaxime CAZ=Ceftazidime FEP=Cefepime IPM=Imipenem ETP=Ertapenem TZP=Piperacillin-tazobactam.

Table S33: Resistances to beta-lactams (%) of *Klebsiella aerogenes* in 2017.

|      |                           | AMC |       | AMP |       | CXM     |         |         | FOX |       | CTX     |         | CAZ     |         | FEP     |         | IPM     |         | ETP  |       | TZP     |         |
|------|---------------------------|-----|-------|-----|-------|---------|---------|---------|-----|-------|---------|---------|---------|---------|---------|---------|---------|---------|------|-------|---------|---------|
|      |                           | R   | S     | R   | S     | R       | I       | S       | R   | S     | R       | S       | R       | S       | R       | S       | R       | S       | R    | S     | R       | S       |
| 2017 | Total                     | 24  | (100) | 24  | (100) | 4       | 6       | 13      | 24  | (100) | 5       | 19      | 3       | 21      | 1       | 23      | 5       | 19      | 1    | 3     | 2       | 22      |
|      |                           |     |       |     |       | (17.39) | (26.09) | (56.52) |     |       | (20.83) | (79.17) | (12.5)  | (87.5)  | (4.17)  | (95.83) | (20.83) | (79.17) | (25) | (75)  | (8.33)  | (91.67) |
|      | Collection bag            | 1   | (100) | 1   | (100) | 1       |         |         | 1   | (100) | 1       | (100)   | 1       | (100)   | 1       | (100)   | 1       | (100)   |      |       | 1       | (100)   |
|      | Permanent catheterization | 2   | (100) | 2   | (100) | 1       | 1       |         | 2   | (100) | 2       | (100)   | 2       | (100)   | 2       | (100)   | 2       | (100)   | 1    | (100) | 2       | (100)   |
|      |                           |     |       |     |       | (50)    | (50)    |         |     |       |         |         |         |         |         |         |         |         |      |       |         |         |
|      | Clean catch midstream     | 14  | (100) | 14  | (100) | 2       | 3       | 8       | 14  | (100) | 3       | 11      | 2       | 12      | 1       | 13      | 4       | 10      | 2    | (100) | 1       | 13      |
|      |                           |     |       |     |       | (15.38) | (23.08) | (61.54) |     |       | (21.43) | (78.57) | (14.29) | (85.71) | (7.14)  | (92.86) | (28.57) | (71.43) |      |       | (7.14)  | (92.86) |
|      | Urinary catheter          | 7   | (100) | 7   | (100) | 2       | 1       | 4       | 7   | (100) | 2       | 5       | 1       | 6       | 7       | (100)   | 1       | 6       | 1    | (100) | 1       | 6       |
|      |                           |     |       |     |       | (28.57) | (14.29) | (57.14) |     |       | (28.57) | (71.43) | (14.29) | (85.71) |         |         | (14.29) | (85.71) |      |       | (14.29) | (85.71) |
|      | Children                  | 4   | (100) | 4   | (100) | 1       | 3       |         | 4   | (100) | 1       | 3       | 1       | 3       | 4       | (100)   | 1       | 3       | 1    | (100) | 4       | (100)   |
|      |                           |     |       |     |       | (25)    | (75)    |         |     |       | (25)    | (75)    | (25)    | (75)    |         |         | (25)    | (75)    |      |       |         |         |
|      | Adults                    | 8   | (100) | 8   | (100) | 1       |         | 6       | 8   | (100) | 2       | 6       | 1       | 7       | 8       | (100)   | 2       | 6       | 1    | (100) | 1       | 7       |
|      |                           |     |       |     |       | (14.29) |         | (85.71) |     |       | (25)    | (75)    | (12.5)  | (87.5)  |         |         | (25)    | (75)    |      |       | (12.5)  | (87.5)  |
|      | Elderly                   | 12  | (100) | 12  | (100) | 2       | 3       | 7       | 12  | (100) | 2       | 10      | 1       | 11      | 1       | 11      | 2       | 10      | 1    | 1     | 1       | 11      |
|      |                           |     |       |     |       | (16.67) | (25)    | (58.33) |     |       | (16.67) | (83.33) | (8.33)  | (91.67) | (8.33)  | (91.67) | (16.67) | (83.33) | (50) | (50)  | (8.33)  | (91.67) |
|      | Outpatient                | 15  | (100) | 15  | (100) | 1       | 4       | 10      | 15  | (100) | 1       | 14      | 15      | (100)   | 15      | (100)   | 3       | 12      | 1    | (100) | 15      | (100)   |
|      |                           |     |       |     |       | (6.67)  | (26.67) | (66.67) |     |       | (6.67)  | (93.33) |         |         |         |         | (20)    | (80)    |      |       |         |         |
|      | Inpatient                 | 9   | (100) | 9   | (100) | 3       | 2       | 3       | 9   | (100) | 4       | 5       | 3       | 6       | 1       | 8       | 2       | 7       | 3    | (100) | 2       | 7       |
|      |                           |     |       |     |       | (37.5)  | (25)    | (37.5)  |     |       | (44.44) | (55.56) | (33.33) | (66.67) | (11.11) | (88.89) | (22.22) | (77.78) |      |       | (22.22) | (77.78) |
|      | Men                       | 13  | (100) | 13  | (100) | 3       | 4       | 5       | 13  | (100) | 4       | 9       | 3       | 10      | 1       | 12      | 1       | 12      | 3    | (100) | 2       | 11      |
|      |                           |     |       |     |       | (25)    | (33.33) | (41.67) |     |       | (30.77) | (69.23) | (23.08) | (76.92) | (7.69)  | (92.31) | (7.69)  | (92.31) |      |       | (15.38) | (84.62) |
|      | Women                     | 11  | (100) | 11  | (100) | 1       | 2       | 8       | 11  | (100) | 1       | 10      | 11      | (100)   | 11      | (100)   | 4       | 7       | 1    | (100) | 11      | (100)   |
|      |                           |     |       |     |       | (9.09)  | (18.18) | (72.73) |     |       | (9.09)  | (90.91) |         |         |         |         | (36.36) | (63.64) |      |       |         |         |

AMC= Amoxicillin-clavulanic acid; AMP=Ampicillin CXM=Cefuroxime FOX=Cefoxitin CTX=Cefotaxime CAZ=Ceftazidime FEP=Cefepime IPM=Imipenem ETP=Ertapenem TZP=Piperacillin-tazobactam.



Table S34: Resistances to beta-lactams (%) of *Klebsiella aerogenes* in 2018.

|      |                           | AMC |       | AMP |       | CXM |   |         | FOX |       | CTX |    |         | CAZ |    | FEP |       | IPM |    |         | TZP |    |         |
|------|---------------------------|-----|-------|-----|-------|-----|---|---------|-----|-------|-----|----|---------|-----|----|-----|-------|-----|----|---------|-----|----|---------|
|      |                           | R   | S     | R   | S     | R   | I | S       | R   | S     | R   | I  | S       | R   | S  | R   | S     | R   | I  | S       | R   | I  | S       |
| 2018 | Total                     | 21  | (100) | 21  | (100) | 9   | 4 | 8       | 21  | (100) | 8   | 13 | (61.9)  | 8   | 13 | 21  | (100) | 3   | 16 | (84.21) | 6   | 15 | (71.43) |
|      | Permanent catheterization | 3   | (100) | 3   | (100) | 2   | 1 | (33.33) | 3   | (100) | 1   | 2  | (66.67) | 1   | 2  | 3   | (100) | 1   | 2  | (66.67) | 1   | 2  | (66.67) |
|      | Clean catch midstream     | 16  | (100) | 16  | (100) | 5   | 3 | 8       | 16  | (100) | 5   | 11 | (68.75) | 5   | 11 | 16  | (100) | 2   | 12 | (85.71) | 3   | 13 | (81.25) |
|      | Urinary catheter          | 2   | (100) | 2   | (100) | 2   |   | (100)   | 2   | (100) | 2   |    | (100)   | 2   |    | 2   | (100) |     | 2  | (100)   | 2   |    | (100)   |
|      | Adults                    | 11  | (100) | 11  | (100) | 4   | 1 | 6       | 11  | (100) | 4   | 7  | (63.63) | 4   | 7  | 11  | (100) | 2   | 7  | (77.78) | 4   | 7  | (63.64) |
|      | Elderly                   | 10  | (100) | 10  | (100) | 5   | 3 | 2       | 10  | (100) | 4   | 6  | (60)    | 4   | 6  | 10  | (100) | 1   | 9  | (90)    | 2   | 8  | (80)    |
|      | Outpatient                | 7   | (100) | 7   | (100) |     | 1 | 6       | 7   | (100) |     | 7  | (100)   |     | 7  | 7   | (100) | 2   | 3  | (60)    |     | 7  | (100)   |
|      | Inpatient                 | 14  | (100) | 14  | (100) | 9   | 3 | 2       | 14  | (100) | 8   | 6  | (42.86) | 8   | 6  | 14  | (100) | 1   | 13 | (92.86) | 6   | 8  | (57.14) |
|      | Men                       | 11  | (100) | 11  | (100) | 7   | 2 | 2       | 11  | (100) | 6   | 5  | (45.45) | 6   | 5  | 11  | (100) | 1   | 9  | (90)    | 5   | 6  | (54.55) |
|      | Women                     | 10  | (100) | 10  | (100) | 2   | 2 | 6       | 10  | (100) | 2   | 8  | (80)    | 2   | 8  | 10  | (100) | 2   | 7  | (77.78) | 1   | 9  | (90)    |

AMC= Amoxicillin-clavulanic acid; AMP=Ampicillin CXM=Cefuroxime FOX=Cefoxitin CTX=Cefotaxime CAZ=Ceftazidime FEP=Cefepime IPM=Imipenem ETP=Ertapenem TZP=Piperacillin-tazobactam.

Table S35: Resistances to beta-lactams (%) of *Klebsiella aerogenes* in 2019.

|      |                           | AMC             |                 | AMP               |                   | TIC               |                  | CXM               |   |   | FOX             |                   | CFM               |                  | CTX              |                   |                   | CAZ             |                   |                  | FEP               |                 | IPM              |                   |                  | ETP               |                   | TZP               |                   |                   |
|------|---------------------------|-----------------|-----------------|-------------------|-------------------|-------------------|------------------|-------------------|---|---|-----------------|-------------------|-------------------|------------------|------------------|-------------------|-------------------|-----------------|-------------------|------------------|-------------------|-----------------|------------------|-------------------|------------------|-------------------|-------------------|-------------------|-------------------|-------------------|
|      |                           | R               | S               | R                 | S                 | R                 | S                | R                 | I | S | R               | S                 | R                 | S                | R                | I                 | S                 | R               | I                 | S                | R                 | S               | R                | I                 | S                | R                 | S                 | R                 | I                 | S                 |
| 2019 | Total                     | 37<br>(10<br>0) | 37<br>(10<br>0) | 15<br>(50)        | 15<br>(50)        | 10<br>(27.0<br>3) | 2<br>(5.41<br>)  | 25<br>(67.5<br>7) |   |   | 37<br>(10<br>0) | 10<br>(34.4<br>8) | 19<br>(65.5<br>2) | 9<br>(25)        | 2<br>(5.56<br>)  | 25<br>(69.4<br>4) | 10<br>(27.0<br>3) | 1<br>(2.7<br>)  | 26<br>(70.2<br>7) | 3<br>(8.33<br>)  | 33<br>(91.6<br>7) | 1<br>(2.7<br>)  | 4<br>(10.8<br>1) | 32<br>(86.4<br>9) | 2<br>(6.67<br>)  | 28<br>(93.3<br>3) | 3<br>(8.11<br>)   | 5<br>(13.5<br>1)  | 29<br>(78.3<br>8) |                   |
|      | Permanent catheterization | 5<br>(10<br>0)  | 5<br>(10<br>0)  | 5<br>(100<br>)    |                   | 4<br>(80)         |                  | 1<br>(20)         |   |   | 5<br>(10<br>0)  | 3<br>(60)         | 2<br>(40)         | 3<br>(60)        |                  | 2<br>(40)         | 3<br>(60)         |                 | 2<br>(40)         | 1<br>(20)        | 4<br>(80)         |                 | 1<br>(20)        | 4<br>(80)         | 1<br>(20)        | 4<br>(80)         | 1<br>(20)         | 2<br>(40)         | 2<br>(40)         |                   |
|      | Clean catch midstream     | 23<br>(10<br>0) | 23<br>(10<br>0) | 8<br>(44.4<br>4)  | 10<br>(55.5<br>6) | 5<br>(21.7<br>4)  | 2<br>(8.69<br>)  | 16<br>(69.5<br>7) |   |   | 23<br>(10<br>0) | 6<br>(35.2<br>9)  | 11<br>(64.7<br>3) | 5<br>(22.7<br>3) | 1<br>(4.55<br>)  | 16<br>(72.7<br>3) | 6<br>(26.0<br>9)  | 1<br>(4.3<br>5) | 16<br>(69.5<br>7) | 2<br>(9.09<br>)  | 20<br>(90.9<br>1) | 1<br>(4.3<br>5) | 2<br>(8.69<br>)  | 20<br>(86.9<br>6) | 1<br>(5.56<br>)  | 17<br>(94.4<br>4) | 2<br>(8.69<br>)   | 3<br>(13.0<br>4)  | 18<br>(78.2<br>6) |                   |
|      | Urinary catheter          | 9<br>(10<br>0)  | 9<br>(10<br>0)  | 2<br>(28.5<br>7)  | 5<br>(71.4<br>3)  | 1<br>(11.1<br>1)  |                  | 8<br>(88.8<br>9)  |   |   | 9<br>(10<br>0)  | 1<br>(14.2<br>9)  | 6<br>(85.7<br>1)  | 1<br>(11.1<br>1) | 1<br>(11.1<br>1) | 7<br>(77.7<br>8)  | 1<br>(11.1<br>1)  |                 | 8<br>(88.8<br>9)  |                  | 9<br>(100<br>)    |                 | 1<br>(11.1<br>1) | 8<br>(88.8<br>9)  |                  | 7<br>(100<br>)    |                   | 9<br>(100<br>)    |                   |                   |
|      | Children                  | 2<br>(10<br>0)  | 2<br>(10<br>0)  |                   | 1<br>(100<br>)    |                   |                  | 2<br>(100<br>)    |   |   | 2<br>(10<br>0)  |                   | 1<br>(100<br>)    |                  |                  | 2<br>(100<br>)    |                   |                 | 2<br>(100<br>)    |                  | 2<br>(100<br>)    |                 | 1<br>(50)        | 1<br>(50)         |                  | 1<br>(100<br>)    |                   |                   | 2<br>(100<br>)    |                   |
|      | Adults                    | 13<br>(10<br>0) | 13<br>(10<br>0) | 4<br>(40)         | 6<br>(60)         | 2<br>(15.3<br>8)  | 2<br>(15.3<br>8) | 9<br>(69.2<br>3)  |   |   | 13<br>(10<br>0) | 2<br>(22.2<br>2)  | 7<br>(77.7<br>8)  | 2<br>(16.6<br>7) |                  | 10<br>(83.3<br>3) | 3<br>(23.0<br>8)  | 1<br>(7.6<br>9) | 9<br>(69.2<br>3)  | 1<br>(8.33<br>)  | 11<br>(91.6<br>7) |                 | 2<br>(15.3<br>8) | 11<br>(84.6<br>2) | 1<br>(10)        | 9<br>(90)         | 2<br>(8)          | 11<br>(84.6<br>2) |                   |                   |
|      | Elderly                   | 22<br>(10<br>0) | 22<br>(10<br>0) | 11<br>(57.8<br>9) | 8<br>(42.1<br>1)  | 8<br>(36.3<br>6)  |                  | 14<br>(63.6<br>4) |   |   | 22<br>(10<br>0) | 8<br>(42.1<br>1)  | 11<br>(57.8<br>9) | 7<br>(31.8<br>2) | 2<br>(9.09<br>)  | 13<br>(59.0<br>9) | 7<br>(31.8<br>2)  |                 | 15<br>(68.1<br>8) | 2<br>(9.09<br>)  | 20<br>(90.9<br>1) | 1<br>(4.5<br>5) | 1<br>(4.55<br>)  | 20<br>(90.9<br>1) | 1<br>(5.26<br>)  | 18<br>(94.7<br>4) | 1<br>(4.55<br>)   | 5<br>(22.7<br>3)  | 16<br>(72.7<br>3) |                   |
|      | Outpatient                | 15<br>(10<br>0) | 15<br>(10<br>0) | 4<br>(36.3<br>6)  | 7<br>(63.6<br>4)  | 2<br>(13.3<br>3)  | 1<br>(6.67<br>)  | 12<br>(80)        |   |   | 15<br>(10<br>0) | 3<br>(27.2<br>7)  | 8<br>(72.7<br>3)  | 2<br>(13.3<br>3) | 1<br>(6.67<br>)  | 12<br>(80)        | 2<br>(13.3<br>3)  |                 | 13<br>(86.6<br>7) |                  | 15<br>(100<br>)   |                 | 1<br>(6.67<br>)  | 14<br>(93.3<br>3) |                  | 11<br>(100<br>)   |                   | 1<br>(6.67<br>)   | 13<br>(86.6<br>7) |                   |
|      | Inpatient                 | 22<br>(10<br>0) | 22<br>(10<br>0) | 11<br>(57.8<br>9) | 8<br>(42.1<br>1)  | 8<br>(36.3<br>6)  | 1<br>(4.55<br>)  | 13<br>(59.0<br>9) |   |   | 22<br>(10<br>0) | 7<br>(38.8<br>9)  | 11<br>(61.1<br>1) | 7<br>(33.3<br>3) | 1<br>(4.76<br>)  | 13<br>(14.2<br>9) | 8<br>(36.3<br>6)  | 1<br>(4.5<br>5) | 13<br>(59.0<br>9) | 3<br>(14.2<br>9) | 18<br>(85.7<br>1) | 1<br>(4.5<br>5) | 3<br>(13.6<br>4) | 18<br>(81.8<br>2) | 2<br>(10.5<br>3) | 17<br>(89.4<br>7) | 2<br>(9.09<br>)   | 4<br>(18.1<br>8)  | 16<br>(72.7<br>3) |                   |
|      | Men                       | 18<br>(10<br>0) | 18<br>(10<br>0) | 10<br>(62.5<br>)  | 6<br>(37.5<br>)   | 9<br>(50)         | 1<br>(5.56<br>)  | 8<br>(44.4<br>4)  |   |   | 18<br>(10<br>0) | 8<br>(50)         | 8<br>(50)         | 8<br>(44.4<br>4) |                  | 10<br>(55.5<br>6) | 8<br>(44.4<br>4)  |                 | 10<br>(55.5<br>6) | 2<br>(11.1<br>1) | 16<br>(88.8<br>9) |                 | 1<br>(5.56<br>)  | 17<br>(94.4<br>4) |                  | 1<br>(6.25<br>)   | 15<br>(93.7<br>5) | 3<br>(16.6<br>7)  | 4<br>(22.2<br>2)  | 11<br>(61.1<br>1) |
|      | Women                     | 19<br>(10<br>0) | 19<br>(10<br>0) | 5<br>(35.7<br>1)  | 9<br>(64.2<br>9)  | 1<br>(5.26<br>)   | 1<br>(5.26<br>)  | 17<br>(89.4<br>7) |   |   | 19<br>(10<br>0) | 2<br>(15.3<br>8)  | 11<br>(84.6<br>2) | 1<br>(5.56<br>)  | 2<br>(11.1<br>1) | 15<br>(83.3<br>3) | 2<br>(10.5<br>3)  | 1<br>(5.2<br>6) | 16<br>(84.2<br>1) | 1<br>(5.56<br>)  | 17<br>(94.4<br>4) | 1<br>(5.2<br>6) | 3<br>(15.7<br>9) | 15<br>(78.9<br>5) | 1<br>(7.14<br>)  | 13<br>(92.8<br>6) |                   | 1<br>(5.26<br>)   | 18<br>(94.7<br>4) |                   |

AMC= Amoxicillin-clavulanic acid; AMP=Ampicillin CXM=Cefuroxime FOX=Cefoxitin CTX=Cefotaxime CAZ=Ceftazidime FEP=Cefepime IPM=Imipenem ETP=Ertapenem TZP=Piperacillin-tazobactam.

Table S36: Resistances to beta-lactams (%) of *Klebsiella aerogenes* in 2020.

|      |                           | AMC             |                 | AMP               |                  | TIC              |                   |                   | CXM             |                   | FOX               |                   | CFM              |                   | CTX               |                  |                   | CAZ              |                   |                  | FEP               |                 | IPM              |                   | ETP              |                  |                   | TZP              |               |   |
|------|---------------------------|-----------------|-----------------|-------------------|------------------|------------------|-------------------|-------------------|-----------------|-------------------|-------------------|-------------------|------------------|-------------------|-------------------|------------------|-------------------|------------------|-------------------|------------------|-------------------|-----------------|------------------|-------------------|------------------|------------------|-------------------|------------------|---------------|---|
|      |                           | R               | S               | R                 | S                | R                | I                 | S                 | R               | S                 | R                 | S                 | R                | S                 | R                 | I                | S                 | R                | I                 | S                | R                 | S               | R                | S                 | R                | I                | S                 | R                | I             | S |
| 2020 | Total                     | 23<br>(10<br>0) | 23<br>(10<br>0) | 13<br>(56.5<br>2) | 2<br>(8.69<br>)  | 8<br>(34.7<br>8) | 12<br>(52.1<br>7) | 11<br>(47.8<br>3) | 23<br>(10<br>0) | 11<br>(47.8<br>3) | 12<br>(52.1<br>7) | 10<br>(43.4<br>8) | 1<br>(4.35<br>)  | 12<br>(52.1<br>7) | 10<br>(43.4<br>8) | 1<br>(4.35<br>)  | 12<br>(52.1<br>7) | 3<br>(13.0<br>4) | 20<br>(86.9<br>6) | 1<br>(4.35<br>)  | 22<br>(95.6<br>5) | 1<br>(4.35<br>) | 1<br>(4.3<br>5)  | 21<br>(91.3<br>5) | 8<br>(34.7<br>8) | 2<br>(8.69<br>)  | 13<br>(56.5<br>2) |                  |               |   |
|      | Nephrostomy catheter      | 1<br>(10<br>0)  | 1<br>(10<br>0)  |                   |                  | 1<br>(100<br>)   |                   | 1<br>(100<br>)    | 1<br>(10<br>0)  |                   | 1<br>(100<br>)    |                   |                  | 1<br>(100<br>)    |                   |                  | 1<br>(100<br>)    |                  |                   | 1<br>(100<br>)   |                   |                 |                  | 1<br>(100<br>)    |                  |                  | 1<br>(100<br>)    |                  |               |   |
|      | Permanent catheterization | 7<br>(10<br>0)  | 7<br>(10<br>0)  | 4<br>(57.1<br>4)  | 1<br>(14.2<br>9) | 2<br>(28.5<br>7) | 4<br>(57.1<br>4)  | 3<br>(42.8<br>6)  | 7<br>(10<br>0)  | 3<br>(42.8<br>6)  | 4<br>(57.1<br>4)  | 3<br>(42.8<br>6)  | 1<br>(14.2<br>9) | 3<br>(42.8<br>6)  | 3<br>(42.8<br>6)  | 1<br>(14.2<br>9) | 3<br>(42.8<br>6)  | 3<br>(42.8<br>6) | 4<br>(57.1<br>4)  |                  | 7<br>(100<br>)    |                 | 1<br>(14.2<br>9) |                   | 6<br>(85.7<br>1) | 3<br>(42.8<br>6) |                   | 4<br>(57.1<br>4) |               |   |
|      | Clean catch midstream     | 8<br>(10<br>0)  | 8<br>(10<br>0)  | 5<br>(62.5<br>)   | 1<br>(12.5<br>)  | 2<br>(25<br>)    | 5<br>(62.5<br>)   | 3<br>(37.5<br>)   | 8<br>(10<br>0)  | 3<br>(37.5<br>)   | 5<br>(62.5<br>)   | 3<br>(37.5<br>)   |                  | 5<br>(62.5<br>)   | 3<br>(37.5<br>)   |                  | 5<br>(62.5<br>)   |                  |                   | 8<br>(100<br>)   |                   |                 |                  | 1<br>(12.5<br>5)  | 7<br>(87.5<br>)  | 3<br>(37.5<br>)  | 1<br>(12.5<br>)   | 4<br>(50<br>)    |               |   |
|      | Urinary catheter          | 7<br>(10<br>0)  | 7<br>(10<br>0)  | 4<br>(57.1<br>4)  |                  | 3<br>(42.8<br>6) | 3<br>(42.8<br>6)  | 4<br>(57.1<br>4)  | 7<br>(10<br>0)  | 5<br>(71.4<br>3)  | 2<br>(28.5<br>7)  | 4<br>(57.1<br>4)  |                  | 3<br>(42.8<br>6)  | 4<br>(57.1<br>4)  |                  | 3<br>(42.8<br>6)  | 7<br>(100<br>)   |                   | 1<br>(14.2<br>9) | 6<br>(85.7<br>1)  |                 |                  | 7<br>(100<br>)    | 2<br>(28.5<br>7) | 1<br>(14.2<br>9) | 4<br>(57.1<br>4)  |                  |               |   |
|      | Children                  | 3<br>(10<br>0)  | 3<br>(10<br>0)  |                   |                  | 3<br>(100<br>)   |                   | 3<br>(100<br>)    | 3<br>(10<br>0)  | 1<br>(33.3<br>3)  | 2<br>(66.6<br>7)  |                   |                  | 3<br>(100<br>)    |                   |                  | 3<br>(100<br>)    |                  |                   | 3<br>(100<br>)   |                   |                 |                  | 3<br>(100<br>)    |                  |                  | 3<br>(100<br>)    |                  |               |   |
|      | Adults                    | 5<br>(10<br>0)  | 5<br>(10<br>0)  | 4<br>(80<br>)     |                  | 1<br>(20<br>)    | 4<br>(80<br>)     | 1<br>(20<br>)     | 5<br>(10<br>0)  | 3<br>(60<br>)     | 2<br>(40<br>)     | 3<br>(60<br>)     |                  | 2<br>(40<br>)     | 3<br>(60<br>)     |                  | 2<br>(40<br>)     |                  |                   | 5<br>(100<br>)   |                   |                 |                  | 5<br>(100<br>)    |                  |                  | 1<br>(20<br>)     | 1<br>(20<br>)    | 3<br>(60<br>) |   |
|      | Elderly                   | 15<br>(10<br>0) | 15<br>(10<br>0) | 9<br>(60<br>)     | 2<br>(13.3<br>3) | 4<br>(26.6<br>7) | 8<br>(53.3<br>3)  | 7<br>(46.6<br>7)  | 15<br>(10<br>0) | 7<br>(46.6<br>7)  | 8<br>(53.3<br>3)  | 7<br>(46.6<br>7)  | 1<br>(6.67<br>)  | 7<br>(46.6<br>7)  | 7<br>(46.6<br>7)  | 1<br>(6.67<br>)  | 7<br>(46.6<br>7)  | 3<br>(20<br>)    | 12<br>(80<br>)    | 1<br>(6.67<br>)  | 14<br>(93.3<br>3) | 1<br>(6.67<br>) | 1<br>(6.6<br>7)  | 13<br>(86.6<br>7) | 7<br>(46.6<br>7) | 1<br>(6.67<br>)  | 7<br>(46.6<br>7)  |                  |               |   |
|      | Outpatient                | 4<br>(10<br>0)  | 4<br>(10<br>0)  | 2<br>(50<br>)     |                  | 2<br>(50<br>)    | 3<br>(75<br>)     | 1<br>(25<br>)     | 4<br>(10<br>0)  | 1<br>(25<br>)     | 3<br>(75<br>)     | 1<br>(25<br>)     | 1<br>(25<br>)    | 2<br>(50<br>)     | 1<br>(25<br>)     | 1<br>(25<br>)    | 2<br>(50<br>)     | 1<br>(25<br>)    | 3<br>(75<br>)     |                  | 4<br>(100<br>)    |                 |                  |                   | 4<br>(100<br>)   | 1<br>(25<br>)    |                   | 3<br>(75<br>)    |               |   |
|      | Inpatient                 | 19<br>(10<br>0) | 19<br>(10<br>0) | 11<br>(57.8<br>9) | 2<br>(10.5<br>3) | 6<br>(31.5<br>8) | 9<br>(47.3<br>7)  | 10<br>(52.6<br>3) | 19<br>(10<br>0) | 10<br>(52.6<br>3) | 9<br>(47.3<br>7)  | 9<br>(47.3<br>7)  |                  | 10<br>(52.6<br>3) | 9<br>(47.3<br>7)  |                  | 10<br>(52.6<br>3) | 2<br>(10.5<br>3) | 17<br>(89.4<br>7) | 1<br>(5.26<br>)  | 18<br>(94.7<br>4) | 1<br>(5.26<br>) | 1<br>(5.2<br>6)  | 17<br>(89.4<br>7) | 7<br>(36.8<br>4) | 2<br>(10.5<br>3) | 10<br>(52.6<br>3) |                  |               |   |
|      | Men                       | 14<br>(10<br>0) | 14<br>(10<br>0) | 8<br>(57.1<br>4)  |                  | 6<br>(42.8<br>6) | 8<br>(57.1<br>4)  | 6<br>(42.8<br>6)  | 14<br>(10<br>0) | 7<br>(50<br>)     | 7<br>(50<br>)     | 6<br>(42.8<br>6)  | 1<br>(7.14<br>)  | 7<br>(50<br>)     | 6<br>(42.8<br>6)  | 1<br>(7.14<br>)  | 7<br>(50<br>)     | 3<br>(21.4<br>3) | 11<br>(78.5<br>7) | 1<br>(7.14<br>)  | 13<br>(92.8<br>6) | 1<br>(7.14<br>) | 1<br>(7.1<br>4)  | 12<br>(85.7<br>1) | 6<br>(42.8<br>6) |                  | 8<br>(57.1<br>4)  |                  |               |   |
|      | Women                     | 9<br>(10<br>0)  | 9<br>(10<br>0)  | 5<br>(55.5<br>6)  | 2<br>(22.2<br>2) | 2<br>(22.2<br>2) | 4<br>(44.4<br>4)  | 5<br>(55.5<br>6)  | 9<br>(10<br>0)  | 4<br>(44.4<br>4)  | 5<br>(55.5<br>6)  | 4<br>(44.4<br>4)  |                  | 5<br>(55.5<br>6)  | 4<br>(44.4<br>4)  |                  | 5<br>(55.5<br>6)  |                  |                   | 9<br>(100<br>)   |                   |                 |                  | 9<br>(100<br>)    | 2<br>(22.2<br>2) | 2<br>(22.2<br>2) | 5<br>(55.5<br>6)  |                  |               |   |

AMC= Amoxicillin-clavulanic acid AMP=Ampicillin CXM=Cefuroxime FOX=Cefoxitin CTX=Cefotaxime CAZ=Ceftazidime FEP=Cefepime IPM=Imipenem ETP=Ertapenem TZP=Piperacillin-tazobactam.

Table S37: Resistances to beta-lactams (%) of *Klebsiella aerogenes* in 2021.

|      |                           | AMC         |   | AMP         |   | TIC          |               | CXM          |               | FOX         |   | CFM          |               | CTX          |               | CAZ          |            |               | FEP          |               | IPM         |             | ETP         |             | TZP          |               |               |
|------|---------------------------|-------------|---|-------------|---|--------------|---------------|--------------|---------------|-------------|---|--------------|---------------|--------------|---------------|--------------|------------|---------------|--------------|---------------|-------------|-------------|-------------|-------------|--------------|---------------|---------------|
|      |                           | R           | S | R           | S | R            | S             | R            | S             | R           | S | R            | S             | R            | S             | R            | I          | S             | R            | S             | R           | S           | R           | S           | R            | I             | S             |
| 2021 | Total                     | 13<br>(100) |   | 13<br>(100) |   | 2<br>(15.38) | 11<br>(84.62) | 2<br>(15.38) | 11<br>(84.62) | 12<br>(100) |   | 2<br>(15.38) | 11<br>(84.62) | 2<br>(15.38) | 11<br>(84.62) | 2<br>(15.38) |            | 11<br>(84.62) | 1<br>(7.69)  | 12<br>(92.31) | 13<br>(100) |             | 13<br>(100) |             | 1<br>(7.69)  | 1<br>(7.69)   | 11<br>(84.62) |
|      | Permanent catheterization | 1<br>(100)  |   | 1<br>(100)  |   |              |               |              |               |             |   |              | 1<br>(100)    |              | 1<br>(100)    |              | 1<br>(100) |               | 1<br>(100)   |               | 1<br>(100)  |             | 1<br>(100)  |             |              |               | 1<br>(100)    |
|      | Clean catch midstream     | 11<br>(100) |   | 11<br>(100) |   | 1<br>(9.09)  | 10<br>(90.91) | 1<br>(9.09)  | 10<br>(90.91) | 11<br>(100) |   | 1<br>(9.09)  | 10<br>(90.91) | 1<br>(9.09)  | 10<br>(90.91) | 1<br>(9.09)  |            | 10<br>(90.91) |              | 11<br>(100)   |             | 11<br>(100) |             |             | 1<br>(9.09)  | 10<br>(90.91) |               |
|      | Urinary catheter          | 1<br>(100)  |   | 1<br>(100)  |   | 1<br>(100)   |               | 1<br>(100)   |               | 1<br>(100)  |   | 1<br>(100)   |               | 1<br>(100)   |               | 1<br>(100)   |            |               | 1<br>(100)   |               | 1<br>(100)  |             | 1<br>(100)  |             | 1<br>(100)   |               |               |
|      | Children                  | 9<br>(100)  |   | 9<br>(100)  |   | 2<br>(22.22) | 7<br>(77.78)  | 2<br>(22.22) | 7<br>(77.78)  | 9<br>(100)  |   | 2<br>(22.22) | 7<br>(77.78)  | 2<br>(22.22) | 7<br>(77.78)  | 2<br>(22.22) |            | 7<br>(77.78)  | 1<br>(11.11) | 8<br>(88.89)  | 9<br>(100)  |             | 9<br>(100)  |             | 1<br>(11.11) | 1<br>(11.11)  | 7<br>(77.78)  |
|      | Adults                    | 4<br>(100)  |   | 4<br>(100)  |   |              | 4<br>(100)    |              | 4<br>(100)    | 3<br>(100)  |   |              | 4<br>(100)    |              | 4<br>(100)    |              | 4<br>(100) |               | 4<br>(100)   |               | 4<br>(100)  |             | 4<br>(100)  |             |              |               | 4<br>(100)    |
|      | Elderly                   | 11<br>(100) |   | 11<br>(100) |   | 1<br>(9.09)  | 10<br>(90.91) | 1<br>(9.09)  | 10<br>(90.91) | 10<br>(100) |   | 1<br>(9.09)  | 10<br>(90.91) | 1<br>(9.09)  | 10<br>(90.91) | 1<br>(9.09)  |            | 10<br>(90.91) |              | 11<br>(100)   |             | 11<br>(100) |             |             | 1<br>(9.09)  | 10<br>(90.91) |               |
|      | Outpatient                | 2<br>(100)  |   | 2<br>(100)  |   | 1<br>(50)    | 1<br>(50)     | 1<br>(50)    | 1<br>(50)     | 2<br>(100)  |   | 1<br>(50)    | 1<br>(50)     | 1<br>(50)    | 1<br>(50)     | 1<br>(50)    |            | 1<br>(50)     | 1<br>(50)    | 1<br>(50)     | 1<br>(50)   | 2<br>(100)  |             | 2<br>(100)  |              | 1<br>(50)     | 1<br>(50)     |
|      | Inpatient                 | 3<br>(100)  |   | 3<br>(100)  |   | 1<br>(33.33) | 2<br>(66.67)  | 1<br>(33.33) | 2<br>(66.67)  | 3<br>(100)  |   | 1<br>(33.33) | 2<br>(66.67)  | 1<br>(33.33) | 2<br>(66.67)  | 1<br>(33.33) |            | 2<br>(66.67)  | 1<br>(33.33) | 2<br>(66.67)  | 3<br>(100)  |             | 3<br>(100)  |             | 1<br>(33.33) |               | 2<br>(66.67)  |
|      | Men                       | 10<br>(100) |   | 10<br>(100) |   | 1<br>(10)    | 9<br>(90)     | 1<br>(10)    | 9<br>(90)     | 9<br>(100)  |   | 1<br>(10)    | 9<br>(90)     | 1<br>(10)    | 9<br>(90)     | 1<br>(10)    |            | 9<br>(90)     |              | 10<br>(100)   |             | 10<br>(100) |             | 10<br>(100) |              | 1<br>(10)     | 9<br>(90)     |

AMC= Amoxicillin-clavulanic acid AMP=Ampicillin CXM=Cefuroxime FOX=Cefoxitin CTX=Cefotaxime CAZ=Ceftazidime FEP=Cefepime IPM=Imipenem ETP=Ertapenem TZP=Piperacillin-tazobactam.

Table S38: Resistances to non-beta-lactams (%) of *Klebsiella aerogenes* in 2016.

|      |                           | TOB         |               | GEN         |               | NAL          |               | CIP          |               | FOF          |               | NIT          |               |              | SXT         |               |
|------|---------------------------|-------------|---------------|-------------|---------------|--------------|---------------|--------------|---------------|--------------|---------------|--------------|---------------|--------------|-------------|---------------|
|      |                           | R           | S             | R           | S             | R            | S             | R            | S             | R            | S             | R            | I             | S            | R           | S             |
| 2016 | Total                     | 1<br>(4.35) | 22<br>(95.65) | 1<br>(4.35) | 22<br>(95.65) | 4<br>(17.39) | 19<br>(82.61) | 2<br>(8.69)  | 21<br>(91.3)  | 3<br>(13.04) | 20<br>(86.96) | 6<br>(26.09) | 14<br>(60.87) | 3<br>(13.04) | 1<br>(4.35) | 22<br>(95.65) |
|      | Nephrostomy catheter      |             |               |             |               |              |               |              |               |              |               |              |               |              |             |               |
|      | Permanent catheterization |             | 3<br>(100)    |             | 3<br>(100)    | 1<br>(33.33) | 2<br>(66.67)  |              | 3<br>(100)    |              | 3<br>(100)    | 2<br>(66.67) |               | 1<br>(33.33) |             | 3<br>(100)    |
|      | Clean catch midstream     | 1<br>(7.14) | 13<br>(92.86) | 1<br>(7.14) | 13<br>(92.86) | 2<br>(14.29) | 12<br>(85.71) | 1<br>(7.14)  | 13<br>(92.86) | 2<br>(14.29) | 12<br>(85.71) | 2<br>(14.29) | 10<br>(71.43) | 2<br>(14.29) | 1<br>(7.14) | 13<br>(92.86) |
|      | Urinary catheter          |             | 6<br>(100)    |             | 6<br>(100)    | 1<br>(16.67) | 5<br>(83.33)  | 1<br>(16.67) | 5<br>(83.33)  | 1<br>(16.67) | 5<br>(83.33)  | 2<br>(33.33) | 4<br>(66.67)  |              |             | 6<br>(100)    |
|      | Children                  |             | 2<br>(100)    |             | 2<br>(100)    |              | 2<br>(100)    |              | 2<br>(100)    |              | 2<br>(100)    |              | 2<br>(100)    |              |             | 2<br>(100)    |
|      | Adults                    | 1<br>(9.09) | 10<br>(90.91) | 1<br>(9.09) | 10<br>(90.91) | 2<br>(18.18) | 9<br>(81.82)  | 1<br>(9.09)  | 10<br>(90.91) | 2<br>(18.18) | 9<br>(81.82)  | 3<br>(27.27) | 6<br>(54.55)  | 2<br>(18.18) | 1<br>(9.09) | 10<br>(90.91) |
|      | Elderly                   |             | 10<br>(100)   |             | 10<br>(100)   | 2<br>(20)    | 8<br>(80)     | 1<br>(10)    | 9<br>(90)     | 1<br>(10)    | 9<br>(90)     | 3<br>(30)    | 6<br>(60)     | 1<br>(10)    |             | 10<br>(100)   |
|      | Outpatient                | 1<br>(5.88) | 16<br>(94.12) | 1<br>(5.88) | 16<br>(94.12) | 2<br>(11.76) | 15<br>(88.24) | 1<br>(5.88)  | 16<br>(94.12) | 2<br>(11.76) | 15<br>(88.24) | 4<br>(23.53) | 10<br>(58.82) | 3<br>(17.65) | 1<br>(5.88) | 16<br>(94.12) |
|      | Inpatient                 |             | 6<br>(100)    |             | 6<br>(100)    | 2<br>(33.33) | 4<br>(66.67)  | 1<br>(16.67) | 5<br>(83.33)  | 1<br>(16.67) | 5<br>(83.33)  | 2<br>(33.33) | 4<br>(66.67)  |              |             | 6<br>(100)    |
|      | Men                       | 1<br>(9.09) | 10<br>(90.91) | 1<br>(9.09) | 10<br>(90.91) | 3<br>(27.27) | 8<br>(72.73)  | 1<br>(9.09)  | 10<br>(90.91) | 3<br>(27.27) | 8<br>(72.73)  | 4<br>(36.36) | 4<br>(36.36)  | 3<br>(27.27) | 1<br>(9.09) | 10<br>(90.91) |
|      | Women                     |             | 12<br>(100)   |             | 12<br>(100)   | 1<br>(8.33)  | 11<br>(91.67) | 1<br>(8.33)  | 11<br>(91.67) |              | 12<br>(100)   | 2<br>(16.67) | 10<br>(83.33) |              |             | 12<br>(100)   |

TOB=Tobramycin GEN=Gentamicin NAL=Nalidixic acid CIP=Ciprofloxacin FOF=Fosfomycin NIT=Nitrofurantoin SXT=Trimethoprim-sulfamethoxazole

Table S39: Resistances to non-beta-lactams (%) of *Klebsiella aerogenes* in 2017.

|      |                           | TOB          |               | GEN          |               | NAL          |               | CIP          |              |               | FOF          |               | NIT          |              |               | SXT          |            |               |
|------|---------------------------|--------------|---------------|--------------|---------------|--------------|---------------|--------------|--------------|---------------|--------------|---------------|--------------|--------------|---------------|--------------|------------|---------------|
|      |                           | R            | S             | R            | S             | R            | S             | R            | I            | S             | R            | S             | R            | I            | S             | R            | I          | S             |
| 2017 | Total                     | 1<br>(4.17)  | 23<br>(95.83) | 1<br>(4.17)  | 23<br>(95.83) | 2<br>(8.33)  | 22<br>(91.67) | 1<br>(4.17)  | 1<br>(4.17)  | 22<br>(91.67) | 5<br>(20.83) | 19<br>(79.17) | 2<br>(8.33)  | 12<br>(50)   | 10<br>(41.67) | 1<br>(4.17)  |            | 23<br>(95.83) |
|      | Collection bag            |              | 1<br>(100)    |              | 1<br>(100)    |              | 1<br>(100)    |              |              | 1<br>(100)    | 1<br>(100)   |               |              | 1<br>(100)   |               |              | 1<br>(100) |               |
|      | Permanent catheterization | 1<br>(50)    | 1<br>(50)     | 1<br>(50)    | 1<br>(50)     | 1<br>(50)    | 1<br>(50)     |              |              | 2<br>(100)    | 2<br>(100)   |               |              |              | 2<br>(100)    |              | 2<br>(100) |               |
|      | Clean catch midstream     |              | 14<br>(100)   |              | 14<br>(100)   | 1<br>(7.14)  | 13<br>(92.86) | 1<br>(7.14)  | 1<br>(7.14)  | 12<br>(85.71) | 2<br>(14.29) | 12<br>(85.71) | 2<br>(14.29) | 7<br>(50)    | 5<br>(35.71)  | 1<br>(7.14)  |            | 13<br>(92.86) |
|      | Urinary catheter          |              | 7<br>(100)    |              | 7<br>(100)    |              | 7<br>(100)    |              |              | 7<br>(100)    | 2<br>(28.57) | 5<br>(71.43)  |              | 4<br>(57.14) | 3<br>(42.86)  |              |            | 7<br>(100)    |
|      | Children                  |              | 4<br>(100)    |              | 4<br>(100)    |              | 4<br>(100)    |              | 1<br>(25)    | 3<br>(75)     | 2<br>(50)    | 2<br>(50)     | 1<br>(25)    | 3<br>(75)    |               |              | 4<br>(100) |               |
|      | Adults                    |              | 8<br>(100)    |              | 8<br>(100)    |              | 8<br>(100)    |              |              | 8<br>(100)    | 1<br>(12.5)  | 7<br>(87.5)   | 1<br>(12.5)  | 4<br>(50)    | 3<br>(37.5)   |              |            | 8<br>(100)    |
|      | Elderly                   | 1<br>(8.33)  | 11<br>(91.67) | 1<br>(8.33)  | 11<br>(91.67) | 2<br>(16.67) | 10<br>(83.33) | 1<br>(8.33)  |              | 11<br>(91.67) | 2<br>(16.67) | 10<br>(83.33) |              | 5<br>(41.67) | 7<br>(58.33)  | 1<br>(8.33)  |            | 11<br>(91.67) |
|      | Outpatient                |              | 15<br>(100)   |              | 15<br>(100)   |              | 15<br>(100)   |              |              | 15<br>(100)   | 2<br>(13.33) | 13<br>(86.67) | 1<br>(6.67)  | 8<br>(53.33) | 6<br>(40)     |              |            | 15<br>(100)   |
|      | Inpatient                 | 1<br>(11.11) | 8<br>(88.89)  | 1<br>(11.11) | 8<br>(88.89)  | 2<br>(22.22) | 7<br>(77.78)  | 1<br>(11.11) | 1<br>(11.11) | 7<br>(77.78)  | 3<br>(33.33) | 6<br>(66.67)  | 1<br>(11.11) | 4<br>(44.44) | 4<br>(44.44)  | 1<br>(11.11) |            | 8<br>(88.89)  |
|      | Men                       | 1<br>(7.69)  | 12<br>(92.31) | 1<br>(7.69)  | 12<br>(92.31) | 2<br>(15.38) | 11<br>(84.62) | 1<br>(7.69)  | 1<br>(7.69)  | 11<br>(84.62) | 3<br>(23.08) | 10<br>(76.92) | 1<br>(7.69)  | 6<br>(46.15) | 6<br>(46.15)  | 1<br>(7.69)  |            | 12<br>(92.31) |
|      | Women                     |              | 11<br>(100)   |              | 11<br>(100)   |              | 11<br>(100)   |              |              | 11<br>(100)   | 2<br>(18.18) | 9<br>(81.82)  | 1<br>(9.09)  | 6<br>(54.55) | 4<br>(36.36)  |              |            | 11<br>(100)   |

TOB=Tobramycin GEN=Gentamicin NAL=Nalidixic acid CIP=Ciprofloxacin FOF=Fosfomycin NIT=Nitrofurantoin SXT=Trimethoprim-sulfamethoxazole

Table S40: Resistances to non-beta-lactams (%) of *Klebsiella aerogenes* in 2018.

|      |                           | TOB |             | GEN |             | NAL         |               | CIP         |               | FOF          |               | NIT          |              |              | SXT |             |
|------|---------------------------|-----|-------------|-----|-------------|-------------|---------------|-------------|---------------|--------------|---------------|--------------|--------------|--------------|-----|-------------|
|      |                           | R   | S           | R   | S           | R           | S             | R           | S             | R            | S             | R            | I            | S            | R   | S           |
| 2018 | Total                     |     | 21<br>(100) |     | 21<br>(100) | 1<br>(4.76) | 20<br>(95.24) | 1<br>(4.76) | 20<br>(95.24) | 4<br>(19.05) | 17<br>(80.95) | 1<br>(4.76)  | 13<br>(61.9) | 7<br>(33.33) |     | 21<br>(100) |
|      | Permanent catheterization |     | 3<br>(100)  |     | 3<br>(100)  |             | 3<br>(100)    |             | 3<br>(100)    | 1<br>(33.33) | 2<br>(66.67)  | 1<br>(33.33) | 2<br>(66.67) |              |     | 3<br>(100)  |
|      | Clean catch midstream     |     | 16<br>(100) |     | 16<br>(100) | 1<br>(6.25) | 15<br>(93.75) | 1<br>(6.25) | 15<br>(93.75) | 3<br>(18.75) | 13<br>(81.25) |              | 9<br>(56.25) | 7<br>(43.75) |     | 16<br>(100) |
|      | Urinary catheter          |     | 2<br>(100)  |     | 2<br>(100)  |             | 2<br>(100)    |             | 2<br>(100)    |              | 2<br>(100)    |              | 2<br>(100)   |              |     | 2<br>(100)  |
|      | Children                  |     | 11<br>(100) |     | 11<br>(100) |             | 11<br>(100)   |             | 11<br>(100)   | 1<br>(9.09)  | 10<br>(90.91) |              | 9<br>(81.82) | 2<br>(18.18) |     | 11<br>(100) |
|      | Adults                    |     | 10<br>(100) |     | 10<br>(100) | 1<br>(10)   | 9<br>(90)     | 1<br>(10)   | 9<br>(90)     | 3<br>(30)    | 7<br>(70)     | 1<br>(10)    | 4<br>(40)    | 5<br>(50)    |     | 10<br>(100) |
|      | Elderly                   |     | 7<br>(100)  |     | 7<br>(100)  |             | 7<br>(100)    |             | 7<br>(100)    | 2<br>(28.57) | 5<br>(71.43)  |              | 5<br>(71.43) | 2<br>(28.57) |     | 7<br>(100)  |
|      | Outpatient                |     | 14<br>(100) |     | 14<br>(100) | 1<br>(7.14) | 13<br>(92.86) | 1<br>(7.14) | 13<br>(92.86) | 2<br>(14.29) | 12<br>(85.71) | 1<br>(7.14)  | 8<br>(57.14) | 5<br>(35.71) |     | 14<br>(100) |
|      | Inpatient                 |     | 11<br>(100) |     | 11<br>(100) |             | 11<br>(100)   |             | 11<br>(100)   | 2<br>(18.18) | 9<br>(81.82)  | 1<br>(9.09)  | 6<br>(54.55) | 4<br>(36.36) |     | 11<br>(100) |
|      | Men                       |     | 10<br>(100) |     | 10<br>(100) | 1<br>(10)   | 9<br>(90)     | 1<br>(10)   | 9<br>(90)     | 2<br>(20)    | 8<br>(80)     |              | 7<br>(70)    | 3<br>(30)    |     | 10<br>(100) |

TOB=Tobramycin GEN=Gentamicin NAL=Nalidixic acid CIP=Ciprofloxacin FOF=Fosfomycin NIT=Nitrofurantoin SXT=Trimethoprim-sulfamethoxazole

Table S41: Resistances to non-beta-lactams (%) of *Klebsiella aerogenes* in 2019.

|      |                           | AMK         |             |               | TOB         |             |               | GEN          |             |               | NAL          |               | CIP          |               | LVX          |             |               | FOF          |               | NIT         |              |               | SXT          |               | CST          |               |
|------|---------------------------|-------------|-------------|---------------|-------------|-------------|---------------|--------------|-------------|---------------|--------------|---------------|--------------|---------------|--------------|-------------|---------------|--------------|---------------|-------------|--------------|---------------|--------------|---------------|--------------|---------------|
|      |                           | R           | I           | S             | R           | I           | S             | R            | I           | S             | R            | S             | R            | S             | R            | I           | S             | R            | S             | R           | I            | S             | R            | S             | R            | S             |
| 2019 | Total                     | 1<br>(3.33) |             | 29<br>(96.67) | 2<br>(5.41) | 1<br>(2.7)  | 34<br>(91.89) | 3<br>(8.11)  | 1<br>(2.7%) | 33<br>(89.19) | 7<br>(18.92) | 30<br>(81.08) | 5<br>(13.51) | 32<br>(86.49) | 4<br>(13.33) | 1<br>(3.33) | 25<br>(83.33) | 7<br>(18.92) | 30<br>(81.08) | 6<br>(20)   | 3<br>(10)    | 21<br>(70)    | 4<br>(10.81) | 33<br>(89.19) | 6<br>(20)    | 24<br>(80)    |
|      | Permanent catheterization |             |             | 5<br>(100)    |             | 1<br>(20)   | 4<br>(80)     | 1<br>(20)    | 1<br>(20)   | 3<br>(60)     | 2<br>(40)    | 3<br>(60)     | 2<br>(40)    | 3<br>(60)     | 2<br>(40)    |             | 3<br>(60)     | 2<br>(40)    | 3<br>(60)     | 1<br>(20)   |              | 4<br>(80)     | 2<br>(40)    | 3<br>(60)     | 2<br>(40)    | 3<br>(60)     |
|      | Clean catch midstream     |             | 1<br>(5.56) | 17<br>(94.44) |             | 2<br>(8.69) | 21<br>(91.3)  | 2<br>(8.69)  |             | 21<br>(91.3)  | 4<br>(17.39) | 19<br>(82.61) | 2<br>(8.69)  | 21<br>(91.3)  | 1<br>(5.56)  | 1<br>(5.56) | 16<br>(88.89) | 4<br>(17.39) | 19<br>(82.61) | 5<br>(21.7) | 2<br>(8.69)  | 16<br>(69.57) | 1<br>(4.35)  | 22<br>(95.65) | 3<br>(16.67) | 15<br>(83.33) |
|      | Urinary catheter          |             |             | 7<br>(100)    |             |             | 9<br>(100)    |              |             | 9<br>(100)    | 1<br>(11.11) | 8<br>(88.89)  | 1<br>(11.11) | 8<br>(88.89)  | 1<br>(14.29) |             | 6<br>(85.71)  | 1<br>(11.11) | 8<br>(88.89)  |             | 1<br>(50)    | 1<br>(50)     | 1<br>(11.11) | 8<br>(88.89)  | 1<br>(14.29) | 6<br>(85.71)  |
|      | Children                  |             |             | 1<br>(100)    |             |             | 2<br>(100)    |              |             | 2<br>(100)    |              | 2<br>(100)    |              | 2<br>(100)    |              |             | 1<br>(100)    |              | 2<br>(100)    |             | 1<br>(50)    | 1<br>(50)     |              | 2<br>(100)    |              | 1<br>(100)    |
|      | Adults                    |             |             | 10<br>(100)   | 1<br>(7.69) |             | 12<br>(92.31) | 1<br>(7.69)  | 1<br>(7.69) | 11<br>(84.62) | 2<br>(15.38) | 11<br>(84.62) | 1<br>(7.69)  | 12<br>(92.31) | 1<br>(10)    |             | 9<br>(90)     |              | 13<br>(100)   | 3<br>(27.2) | 1<br>(9.09)  | 7<br>(63.64)  | 2<br>(15.38) | 11<br>(84.62) | 2<br>(20)    | 8<br>(80)     |
|      | Elderly                   |             | 1<br>(5.26) | 18<br>(94.74) | 1<br>(4.55) | 1<br>(4.55) | 20<br>(90.91) | 2<br>(9.09)  |             | 20<br>(90.91) | 5<br>(22.73) | 17<br>(77.27) | 4<br>(18.18) | 18<br>(81.82) | 3<br>(15.79) | 1<br>(5.26) | 15<br>(78.95) | 7<br>(31.82) | 15<br>(68.18) | 3<br>(17.6) | 1<br>(5.88)  | 13<br>(76.47) | 2<br>(9.09)  | 20<br>(90.91) | 4<br>(21.05) | 15<br>(78.95) |
|      | Outpatient                |             |             | 11<br>(100)   |             |             | 15<br>(100)   |              |             | 15<br>(100)   | 3<br>(20)    | 12<br>(80)    | 2<br>(13.33) | 13<br>(86.67) | 1<br>(9.09)  | 1<br>(9.09) | 9<br>(81.82)  | 3<br>(20)    | 12<br>(80)    | 3<br>(23.0) |              | 10<br>(76.92) |              | 15<br>(100)   | 1<br>(9.09)  | 10<br>(90.91) |
|      | Inpatient                 |             | 1<br>(5.26) | 18<br>(94.74) | 2<br>(9.09) | 1<br>(4.55) | 19<br>(86.36) | 3<br>(13.64) | 1<br>(4.55) | 18<br>(81.82) | 4<br>(18.18) | 18<br>(81.82) | 3<br>(13.64) | 19<br>(86.36) | 3<br>(15.79) |             | 16<br>(84.21) | 4<br>(18.18) | 18<br>(81.82) | 3<br>(17.6) | 3<br>(17.65) | 11<br>(64.71) | 4<br>(18.18) | 18<br>(81.82) | 5<br>(26.32) | 14<br>(73.68) |
|      | Men                       |             |             | 16<br>(100)   | 1<br>(5.56) | 1<br>(5.56) | 16<br>(88.89) | 2<br>(11.11) | 1<br>(5.56) | 15<br>(83.33) | 4<br>(22.22) | 14<br>(77.78) | 4<br>(22.22) | 14<br>(77.78) | 3<br>(18.75) | 1<br>(6.25) | 12<br>(75)    | 3<br>(16.67) | 15<br>(83.33) | 4<br>(26.6) | 1<br>(7)     | 10<br>(66.67) | 4<br>(22.22) | 14<br>(77.78) | 3<br>(18.75) | 13<br>(81.25) |
|      | Women                     |             | 1<br>(7.14) | 13<br>(92.86) | 1<br>(5.26) |             | 18<br>(94.74) | 1<br>(5.26)  |             | 18<br>(94.74) | 3<br>(15.79) | 16<br>(84.21) | 1<br>(5.26)  | 18<br>(94.74) | 1<br>(7.14)  |             | 13<br>(92.86) | 4<br>(21.05) | 15<br>(78.95) | 2<br>(13.3) | 2<br>(13.33) | 11<br>(73.33) |              | 19<br>(100)   | 3<br>(21.43) | 11<br>(78.57) |

AMK= Amikacin TOB=Tobramycin GEN=Gentamicin NAL=Nalidixic acid CIP=Ciprofloxacin FOF=Fosfomicin NIT=Nitrofurantoin SXT=Trimethoprim-sulfamethoxazole CST=Colistin



Table S42: Resistances to non-beta-lactams (%) of *Klebsiella aerogenes* in 2020.

|      |                           | AMK         |   | TOB          |               | GEN          |               | NAL          |               | CIP          |              |               | LVX          |              |               | FOF          |               | NIT          |               | SXT          |               | CST          |               |
|------|---------------------------|-------------|---|--------------|---------------|--------------|---------------|--------------|---------------|--------------|--------------|---------------|--------------|--------------|---------------|--------------|---------------|--------------|---------------|--------------|---------------|--------------|---------------|
|      |                           | R           | S | R            | S             | R            | S             | R            | S             | R            | I            | S             | R            | I            | S             | R            | S             | R            | S             | R            | S             | R            | S             |
| 2020 | Total                     | 23<br>(100) |   | 1<br>(4.35)  | 22<br>(95.65) | 1<br>(4.35)  | 22<br>(95.65) | 4<br>(17.39) | 19<br>(82.61) | 3<br>(13.04) | 2<br>(86.96) | 18<br>(78.26) | 3<br>(13.04) | 1<br>(4.35)  | 19<br>(82.61) | 6<br>(26.09) | 17<br>(73.91) | 5<br>(26.32) | 14<br>(73.68) | 1<br>(4.35)  | 22<br>(95.65) | 1<br>(4.35)  | 22<br>(95.65) |
|      | Nephrostomy catheter      | 1<br>(100)  |   |              | 1<br>(100)    |              | 1<br>(100)    |              | 1<br>(100)    |              |              | 1<br>(100)    |              |              | 1<br>(100)    |              | 1<br>(100)    |              |               |              | 1<br>(100)    |              | 1<br>(100)    |
|      | Permanent catheterization | 7<br>(100)  |   |              | 7<br>(100)    | 1<br>(14.29) | 6<br>(85.71)  | 1<br>(14.29) | 6<br>(85.71)  | 2<br>(28.57) | 1<br>(14.29) | 4<br>(57.14)  | 1<br>(14.29) | 1<br>(14.29) | 5<br>(71.43)  | 4<br>(57.14) | 3<br>(42.86)  | 2<br>(28.57) | 5<br>(71.43)  |              | 7<br>(100)    |              | 7<br>(100)    |
|      | Clean catch midstream     | 8<br>(100)  |   |              | 8<br>(100)    |              | 8<br>(100)    | 3<br>(37.5)  | 5<br>(62.5)   | 1<br>(12.5)  | 1<br>(12.5)  | 6<br>(75)     | 2<br>(25)    |              | 6<br>(75)     |              | 8<br>(100)    | 2<br>(25)    | 6<br>(75)     | 1<br>(12.5)  | 7<br>(87.5)   | 1<br>(12.5)  | 7<br>(87.5)   |
|      | Urinary catheter          | 7<br>(100)  |   | 1<br>(14.29) | 6<br>(85.71)  |              | 7<br>(100)    |              | 7<br>(100)    |              |              | 7<br>(100)    |              |              | 7<br>(100)    | 2<br>(28.57) | 5<br>(71.43)  | 1<br>(25)    | 3<br>(75)     |              | 7<br>(100)    |              | 7<br>(100)    |
|      | Children                  | 3<br>(100)  |   |              | 3<br>(100)    |              | 3<br>(100)    | 1<br>(33.33) | 2<br>(66.67)  |              |              | 3<br>(100)    |              |              | 3<br>(100)    | 1<br>(33.33) | 2<br>(66.67)  |              | 2<br>(100)    |              | 3<br>(100)    |              | 3<br>(100)    |
|      | Adults                    | 5<br>(100)  |   |              | 5<br>(100)    |              | 5<br>(100)    | 2<br>(40)    | 3<br>(60)     | 2<br>(40)    |              | 3<br>(60)     | 1<br>(20)    | 1<br>(20)    | 3<br>(60)     | 1<br>(20)    | 4<br>(80)     |              | 4<br>(100)    | 1<br>(20)    | 4<br>(80)     | 1<br>(20)    | 4<br>(80)     |
|      | Elderly                   | 15<br>(100) |   | 1<br>(6.67)  | 14<br>(93.33) | 1<br>(6.67)  | 14<br>(93.33) | 1<br>(6.67)  | 14<br>(93.33) | 1<br>(6.67)  | 2<br>(13.33) | 12<br>(80)    | 2<br>(13.33) |              | 13<br>(86.67) | 4<br>(26.67) | 11<br>(73.33) | 5<br>(38.46) | 8<br>(61.54)  |              | 15<br>(100)   |              | 15<br>(100)   |
|      | Outpatient                | 4<br>(100)  |   |              | 4<br>(100)    | 1<br>(25)    | 3<br>(75)     | 1<br>(25)    | 3<br>(75)     | 1<br>(25)    |              | 3<br>(75)     | 1<br>(25)    |              | 3<br>(75)     | 1<br>(25)    | 3<br>(75)     | 1<br>(25)    | 3<br>(75)     |              | 4<br>(100)    |              | 4<br>(100)    |
|      | Inpatient                 | 19<br>(100) |   | 1<br>(5.26)  | 18<br>(94.74) |              | 19<br>(100)   | 3<br>(15.79) | 16<br>(84.21) | 2<br>(10.53) | 2<br>(10.53) | 15<br>(78.95) | 2<br>(10.53) | 1<br>(5.26)  | 16<br>(84.21) | 5<br>(26.32) | 14<br>(73.68) | 4<br>(26.67) | 11<br>(73.33) | 1<br>(5.26)  | 18<br>(94.74) | 1<br>(5.26)  | 18<br>(94.74) |
|      | Men                       | 14<br>(100) |   | 1<br>(7.14)  | 13<br>(92.86) | 1<br>(7.14)  | 13<br>(92.86) | 2<br>(14.29) | 12<br>(85.71) | 2<br>(14.29) | 1<br>(7.14)  | 11<br>(78.57) | 1<br>(7.14)  | 1<br>(7.14)  | 12<br>(85.71) | 6<br>(42.86) | 8<br>(57.14)  | 3<br>(27.27) | 8<br>(72.73)  |              | 14<br>(100)   |              | 14<br>(100)   |
|      | Women                     | 9<br>(100)  |   |              | 9<br>(100)    |              | 9<br>(100)    | 2<br>(22.22) | 7<br>(77.78)  | 1<br>(11.11) | 1<br>(11.11) | 7<br>(77.78)  | 2<br>(22.22) |              | 7<br>(77.78)  |              | 9<br>(100)    | 2<br>(25)    | 6<br>(75)     | 1<br>(11.11) | 8<br>(88.89)  | 1<br>(11.11) | 8<br>(88.89)  |

AMK= Amikacin TOB=Tobramycin GEN=Gentamicin NAL=Nalidixic acid CIP=Ciprofloxacin FOF=Fosfomycin NIT=Nitrofurantoin SXT=Trimethoprim-sulfamethoxazole CST=Colistin

Table S43: Resistances to non-beta-lactams (%) of *Klebsiella aerogenes* in 2021.

|      |                           | AMK |       | TOB |       | GEN |       | NAL |       | CIP |       | LVX |       | FOF |                      | NIT |                      | SXT |       | CST |                      |
|------|---------------------------|-----|-------|-----|-------|-----|-------|-----|-------|-----|-------|-----|-------|-----|----------------------|-----|----------------------|-----|-------|-----|----------------------|
|      |                           | R   | S     | R   | S     | R   | S     | R   | S     | R   | S     | R   | S     | R   | S                    | R   | S                    | R   | S     | R   | S                    |
| 2021 | Total                     | 13  | (100) | 13  | (100) | 13  | (100) | 13  | (100) | 13  | (100) | 13  | (100) | 1   | 12<br>(7.69) (92.31) | 1   | 12<br>(7.69) (92.31) | 13  | (100) | 1   | 12<br>(7.69) (92.31) |
|      | Permanent catheterization | 1   | (100) | 1   | (100) | 1   | (100) | 1   | (100) | 1   | (100) | 1   | (100) |     | 1<br>(100)           |     | 1<br>(100)           | 1   | (100) |     | 1<br>(100)           |
|      | Clean catch midstream     | 11  | (100) | 11  | (100) | 11  | (100) | 11  | (100) | 11  | (100) | 11  | (100) |     | 11<br>(100)          | 1   | 10<br>(9.09) (90.91) | 11  | (100) | 1   | 10<br>(9.09) (90.91) |
|      | Urinary catheter          | 1   | (100) | 1   | (100) | 1   | (100) | 1   | (100) | 1   | (100) | 1   | (100) | 1   | (100)                |     | 1<br>(100)           | 1   | (100) |     | 1<br>(100)           |
|      | Children                  |     |       | 9   | (100) | 9   | (100) | 9   | (100) | 9   | (100) | 9   | (100) | 1   | 8<br>(11.11) (88.89) | 1   | 8<br>(11.11) (88.89) | 9   | (100) | 1   | 8<br>(11.11) (88.89) |
|      | Adults                    | 4   | (100) | 4   | (100) | 4   | (100) | 4   | (100) | 4   | (100) | 4   | (100) |     | 4<br>(100)           |     | 4<br>(100)           | 4   | (100) |     | 4<br>(100)           |
|      | Elderly                   | 11  | (100) | 11  | (100) | 11  | (100) | 11  | (100) | 11  | (100) | 11  | (100) |     | 11<br>(100)          | 1   | 10<br>(9.09) (90.91) | 11  | (100) | 1   | 10<br>(9.09) (90.91) |
|      | Outpatient                | 2   | (100) | 2   | (100) | 2   | (100) | 2   | (100) | 2   | (100) | 2   | (100) | 1   | 1<br>(50) (50)       |     | 2<br>(100)           | 2   | (100) |     | 2<br>(100)           |
|      | Inpatient                 | 3   | (100) | 3   | (100) | 3   | (100) | 3   | (100) | 3   | (100) | 3   | (100) | 1   | 2<br>(33.33) (66.67) |     | 3<br>(100)           | 3   | (100) |     | 3<br>(100)           |
|      | Men                       | 10  | (100) | 10  | (100) | 10  | (100) | 10  | (100) | 10  | (100) | 10  | (100) |     | 10<br>(100)          | 1   | 9<br>(10) (90)       | 10  | (100) | 1   | 9<br>(10) (90)       |

AMK= Amikacin TOB=Tobramycin GEN=Gentamicin NAL=Nalidixic acid CIP=Ciprofloxacin FOF=Fosfomycin NIT=Nitrofurantoin SXT=Trimethoprim-sulfamethoxazole CST=Colistin

Table S44: Systematic review of the resistance rates (%) of *Citrobacter freundii* in urine cultures.

| Author (year of publication)           | Period    | Place   | N   | CAZ   | FEP  | CRO  | C-T  | IPM | I-R | MEM | ETP | DOR | TZP   | AMK  | TOB  | ATM  | GEN | NAL | NIT | FOF  | CIP   | LVX  | SXT | CST |
|----------------------------------------|-----------|---------|-----|-------|------|------|------|-----|-----|-----|-----|-----|-------|------|------|------|-----|-----|-----|------|-------|------|-----|-----|
| H. Seifert (2018) <sup>17</sup>        | 2014-2015 | Germany | 26  | 34.6  | 3.8  | 38.5 | 30.8 |     |     | 0   | 0   | 0   | 34.6  | 0    | 3.8  |      |     |     |     | 0    | 15.4  | 15.4 |     | 0   |
| S. Lob (2020) <sup>18</sup>            | 2015-2017 | Europe  | 116 | 32.8  | 13.8 |      |      | 1.7 | 0.9 |     |     |     | 27.6  | 2.6  |      | 29.3 |     |     |     |      | 25.9  |      |     | 0   |
| G. Jiménez Guerra (2020) <sup>19</sup> | 2006-2016 | Spain   | 76  |       | 4    |      |      | 6   |     |     |     |     | 11    |      | 15   |      | 16  | 27  | 7   | 7    | 18    |      | 18  |     |
| Weighted averages                      |           |         | 218 | 33.13 | 9.19 | 38.5 | 30.8 | 3.4 | 0.9 | 0   | 0   | 0   | 22.65 | 2.12 | 6.35 | 29.3 | 16  | 27  | 7   | 2.77 | 21.89 | 15.4 | 18  | 0   |

CAZ=Ceftazidime FEP=Cefepime CRO=Ceftriaxone C-T=Ceftolozane-tazobactam IPM=Imipenem I-R=Imipenem-relebactam MEM=Meropenem ETP=Ertapenem DOR=Doripenem  
TZP=Piperacillin-tazobactam AMK=Amikacin TOB=Tobramycin ATM=Aztreonam GEN=Gentamicin NAL=Nalidixic acid NIT=Nitrofurantoin FOF=Fosfomycin CIP=Ciprofloxacin  
LVX=Levofloxacin SXT=Trimethoprim-sulfamethoxazole CST=Colistin

Table S45: General annualized resistances (%) of *Citrobacter freundii* during 2016-2021

|              | AMC              | AMP                | TIC             | CXM               | FOX              | CFM              | CTX               | CAZ               | FEP               | IPM          | ETP            | TZP              | AMK           | TOB              | GEN             | NAL               | CIP               | LVX             | FOF             | NIT             | SXT               | CST           |
|--------------|------------------|--------------------|-----------------|-------------------|------------------|------------------|-------------------|-------------------|-------------------|--------------|----------------|------------------|---------------|------------------|-----------------|-------------------|-------------------|-----------------|-----------------|-----------------|-------------------|---------------|
| <b>2016</b>  | 12/12<br>(100)   | 12/12<br>(100)     | -               | 3/12<br>(25)      | 12/12<br>(100)   | -                | 3/12<br>(25)      | 2/12<br>(16.67)   | 0/12<br>(0)       | 0/11<br>(0)  | -              | 1/12<br>(8.33)   | -             | 0/12<br>(0)      | 0/12<br>(0)     | 1/12<br>(8.33)    | 0/12<br>(0)       | -               | 0/12<br>(0)     | 0/12<br>(0)     | 1/12<br>(8.33)    | -             |
| <b>2017</b>  | 18/18<br>(100)   | 18/18<br>(100)     | -               | 9/18<br>(50)      | 17/17<br>(100)   | -                | 8/18<br>(44.44)   | 6/18<br>(33.33)   | 2/18<br>(11.11)   | 0/18<br>(0)  | -              | 2/18<br>(11.11)  | -             | 1/18<br>(5.56)   | 1/18<br>(5.56)  | 6/18<br>(33.33)   | 5/18<br>(27.78)   | -               | 0/18<br>(0)     | 0/18<br>(0)     | 3/18<br>(0)       | -             |
| <b>2018</b>  | 25/25<br>(100)   | 24/25<br>(96)      | -               | 7/25<br>(28)      | 25/25<br>(100)   | -                | 5/24<br>(20.83)   | 6/25<br>(24)      | 2/25<br>(8)       | 0/24<br>(0)  | -              | 0/25<br>(0)      | -             | 1/25<br>(4)      | 1/25<br>(4)     | 5/25<br>(20)      | 4/25<br>(16)      | -               | 1/25<br>(4)     | 1/25<br>(4)     | 2/25<br>(8)       | -             |
| <b>2019</b>  | 27/27<br>(100)   | 27/27<br>(100)     | 12/25<br>(48)   | 9/27<br>(33.33)   | 26/26<br>(100)   | 18/24<br>(75)    | 10/27<br>(37.04)  | 10/27<br>(37.04)  | 7/27<br>(25.93)   | 0/27<br>(0)  | 1/25<br>(4)    | 5/27<br>(18.52)  | 2/25<br>(8)   | 5/27<br>(18.52)  | 6/27<br>(22.22) | 7/27<br>(25.93)   | 6/27<br>(22.22)   | 5/25<br>(20)    | 0/27<br>(0)     | 1/22<br>(4.55)  | 8/27<br>(29.63)   | 3/25<br>(12)  |
| <b>2020</b>  | 17/17<br>(100)   | 17/17<br>(100)     | 7/17<br>(41.18) | 5/17<br>(29.41)   | 17/17<br>(100)   | 13/17<br>(76.47) | 6/16<br>(37.5)    | 4/16<br>(25)      | 2/17<br>(11.76)   | 0/17<br>(0)  | 1/17<br>(5.88) | 1/17<br>(5.88)   | 0/17<br>(0)   | 2/17<br>(11.76)  | 1/17<br>(5.88)  | 5/17<br>(29.41)   | 5/17<br>(29.41)   | 3/17<br>(17.65) | 0/17<br>(0)     | 0/17<br>(0)     | 3/17<br>(17.65)   | 0/17<br>(0)   |
| <b>2021</b>  | 8/8<br>(100)     | 8/8<br>(100)       | 7/8<br>(87.5)   | 5/8<br>(62.5)     | 8/8<br>(100)     | 6/8<br>(75)      | 5/8<br>(62.5)     | 5/8<br>(62.5)     | 3/8<br>(37.5)     | 0/7<br>(0)   | 1/7<br>(12.5)  | 1/8<br>(12.5)    | 1/8<br>(12.5) | 1/8<br>(12.5)    | 0/8<br>(0)      | 5/8<br>(62.5)     | 4/8<br>(50)       | 2/8<br>(25)     | 2/8<br>(25)     | 0/8<br>(0)      | 1/8<br>(12.5)     | 1/8<br>(12.5) |
| <b>Total</b> | 107/107<br>(100) | 106/107<br>(99.06) | 26/50<br>(52)   | 38/107<br>(35.51) | 105/105<br>(100) | 37/49<br>(75.51) | 37/105<br>(35.24) | 33/106<br>(31.13) | 16/107<br>(14.95) | 0/104<br>(0) | 3/49<br>(6.12) | 10/107<br>(9.35) | 3/50<br>(6)   | 10/107<br>(9.35) | 9/107<br>(8.41) | 29/107<br>(27.10) | 24/107<br>(22.43) | 10/50<br>(20)   | 3/107<br>(2.80) | 2/102<br>(1.96) | 18/107<br>(16.82) | 4/50<br>(8)   |

AMC=Amoxicillin-clavulanic; AMP=Ampicillin; TIC=Ticarcillin; CXM=Cefuroxime; FOX=Cefoxitin; CFM=Cefixime; CTX=Cefotaxime; CAZ=Ceftazidime; FEP=Cefepime; IPM=Imipenem; ETP=Ertapenem; TZP=Piperacillin-tazobactam; AMK: amikacin; TOB=Tobramycin; GEN=Gentamicin; NAL=Nalidixic acid; CIP=Ciprofloxacin; LVX=Levofloxacin; FOF=Fosfomicin NIT=Nitrofurantoin; SXT=Trimethoprim-sulfamethoxazole; CST=Colistin

Table S46: Resistances to beta-lactams (%) of *Citrobacter freundii* in 2016.

|      |                           | AMC         |   | AMP         |   | CXM          |              |              | FOX         |   | CTX          |              | CAZ          |               | FEP          |               |   | IPM         |              | TZP           |  |
|------|---------------------------|-------------|---|-------------|---|--------------|--------------|--------------|-------------|---|--------------|--------------|--------------|---------------|--------------|---------------|---|-------------|--------------|---------------|--|
|      |                           | R           | S | R           | S | R            | I            | S            | R           | S | R            | S            | R            | I             | S            | R             | S | R           | S            |               |  |
| 2016 | Total                     | 12<br>(100) |   | 12<br>(100) |   | 3<br>(25)    | 2<br>(16.67) | 7<br>(58.33) | 12<br>(100) |   | 3<br>(25)    | 9<br>(75)    | 2<br>(16.67) | 10<br>(83.33) | 1<br>(8.33)  | 11<br>(91.67) |   | 11<br>(100) | 1<br>(8.33)  | 11<br>(91.67) |  |
|      | Permanent catheterization | 4<br>(100)  |   | 4<br>(100)  |   | 2<br>(50)    | 1<br>(25)    | 1<br>(25)    | 4<br>(100)  |   | 2<br>(50)    | 2<br>(50)    | 1<br>(25)    | 3<br>(75)     | 1<br>(25)    | 3<br>(75)     |   | 3<br>(100)  | 1<br>(25)    | 3<br>(75)     |  |
|      | Clean catch midstream     | 6<br>(100)  |   | 6<br>(100)  |   | 1<br>(16.67) | 1<br>(16.67) | 4<br>(66.67) | 6<br>(100)  |   | 1<br>(16.67) | 5<br>(83.33) | 1<br>(16.67) | 5<br>(83.33)  |              | 6<br>(100)    |   | 6<br>(100)  |              | 6<br>(100)    |  |
|      | Urinary catheter          | 2<br>(100)  |   | 2<br>(100)  |   |              |              | 4<br>(100)   | 2<br>(100)  |   |              | 2<br>(100)   |              | 2<br>(100)    |              | 2<br>(100)    |   | 2<br>(100)  |              | 2<br>(100)    |  |
|      | Adults                    | 4<br>(100)  |   | 4<br>(100)  |   | 1<br>(25)    | 1<br>(25)    | 2<br>(50)    | 4<br>(100)  |   |              | 4<br>(100)   |              | 4<br>(100)    |              | 4<br>(100)    |   | 3<br>(100)  |              | 4<br>(100)    |  |
|      | Elderly                   | 8<br>(100)  |   | 8<br>(100)  |   | 2<br>(25)    | 1<br>(12.5)  | 5<br>(62.5)  | 8<br>(100)  |   | 3<br>(37.5)  | 5<br>(62.5)  | 2<br>(25)    | 6<br>(75)     | 1<br>(12.5)  | 7<br>(87.5)   |   | 8<br>(100)  | 1<br>(12.5)  | 7<br>(87.5)   |  |
|      | Outpatient                | 8<br>(100)  |   | 8<br>(100)  |   | 1<br>(12.5)  | 1<br>(12.5)  | 6<br>(75)    | 8<br>(100)  |   | 1<br>(12.5)  | 7<br>(87.5)  |              | 8<br>(100)    |              | 8<br>(100)    |   | 8<br>(100)  |              | 8<br>(100)    |  |
|      | Inpatient                 | 4<br>(100)  |   | 4<br>(100)  |   | 2<br>(50)    | 1<br>(25)    | 1<br>(25)    | 4<br>(100)  |   | 2<br>(50)    | 2<br>(50)    | 2<br>(50)    | 2<br>(50)     | 1<br>(25)    | 3<br>(75)     |   | 3<br>(100)  | 1<br>(25)    | 3<br>(75)     |  |
|      | Men                       | 6<br>(100)  |   | 6<br>(100)  |   | 2<br>(33.33) | 1<br>(16.67) | 3<br>(50)    | 6<br>(100)  |   | 3<br>(50)    | 3<br>(50)    | 2<br>(33.33) | 4<br>(66.67)  | 1<br>(16.67) | 5<br>(83.33)  |   | 5<br>(100)  | 1<br>(16.67) | 5<br>(83.33)  |  |
|      | Women                     | 6<br>(100)  |   | 6<br>(100)  |   | 1<br>(16.67) | 1<br>(16.67) | 4<br>(66.67) | 6<br>(100)  |   |              | 6<br>(100)   |              | 6<br>(100)    |              | 6<br>(100)    |   | 6<br>(100)  |              | 6<br>(100)    |  |

AMC= Amoxicillin-clavulanic acid AMP=Ampicillin CXM=Cefuroxime FOX=Cefoxitin CTX=Cefotaxime CAZ=Ceftazidime FEP=Cefepime IPM=Imipenem TZP=Piperacillin-tazobactam.

Table S47: Resistances to beta-lactams (%) of *Citrobacter freundii* in 2017.

|      |                           | AMC         |   | AMP         |   | CXM          |              |              | FOX         |   | CTX          |               |   | CAZ          |              |               | FEP          |              |               | IPM          |               |           | TZP          |              |               |
|------|---------------------------|-------------|---|-------------|---|--------------|--------------|--------------|-------------|---|--------------|---------------|---|--------------|--------------|---------------|--------------|--------------|---------------|--------------|---------------|-----------|--------------|--------------|---------------|
|      |                           | R           | S | R           | S | R            | I            | S            | R           | S | R            | I             | S | R            | I            | S             | R            | I            | S             | R            | I             | S         | R            | I            | S             |
| 2017 | Total                     | 18<br>(100) |   | 18<br>(100) |   | 9<br>(50)    | 3<br>(16.67) | 6<br>(33.33) | 17<br>(100) |   | 8<br>(44.44) | 10<br>(55.56) |   | 6<br>(33.33) | 1<br>(5.56)  | 11<br>(61.11) | 2<br>(11.11) | 2<br>(11.11) | 14<br>(77.78) | 1<br>(5.56)  | 17<br>(94.44) |           | 2<br>(11.11) | 1<br>(5.56)  | 15<br>(83.33) |
|      | Collection bag            | 1<br>(100)  |   | 1<br>(100)  |   | 1<br>(100)   |              |              | 1<br>(100)  |   | 1<br>(100)   |               |   | 1<br>(100)   |              |               |              | 1<br>(100)   |               | 1<br>(100)   |               |           |              | 1<br>(100)   |               |
|      | Nephrostomy catheter      | 1<br>(100)  |   | 1<br>(100)  |   | 1<br>(100)   |              |              | 1<br>(100)  |   | 1<br>(100)   |               |   | 1<br>(100)   |              |               |              | 1<br>(100)   |               | 1<br>(100)   |               |           |              | 1<br>(100)   |               |
|      | Permanent catheterization | 2<br>(100)  |   | 2<br>(100)  |   | 2<br>(100)   |              |              | 2<br>(100)  |   | 2<br>(100)   |               |   | 1<br>(50)    |              | 1<br>(50)     | 1<br>(50)    | 1<br>(50)    |               | 2<br>(100)   |               | 1<br>(50) |              | 1<br>(50)    |               |
|      | Clean catch midstream     | 11<br>(100) |   | 11<br>(100) |   | 3<br>(27.27) | 2<br>(18.18) | 6<br>(54.55) | 10<br>(100) |   | 2<br>(18.18) | 9<br>(81.82)  |   | 1<br>(9.09)  | 1<br>(9.09)  | 9<br>(81.82)  | 1<br>(9.09)  | 1<br>(9.09)  | 9<br>(81.82)  | 1<br>(9.09)  | 10<br>(90.91) |           | 1<br>(9.09)  |              | 10<br>(90.91) |
|      | Urinary catheter          | 3<br>(100)  |   | 3<br>(100)  |   | 2<br>(66.67) | 1<br>(33.33) |              | 3<br>(100)  |   | 2<br>(66.67) | 1<br>(33.33)  |   | 2<br>(66.67) |              | 1<br>(33.33)  |              | 3<br>(100)   |               | 3<br>(100)   |               |           | 1<br>(33.33) | 2<br>(66.67) |               |
|      | Children                  | 2<br>(100)  |   | 2<br>(100)  |   | 1<br>(50)    |              | 1<br>(50)    | 2<br>(100)  |   | 1<br>(50)    | 1<br>(50)     |   | 1<br>(50)    |              | 1<br>(50)     |              | 2<br>(100)   |               | 2<br>(100)   |               |           |              | 2<br>(100)   |               |
|      | Adults                    | 2<br>(100)  |   | 2<br>(100)  |   | 1<br>(50)    | 1<br>(50)    |              | 2<br>(100)  |   | 1<br>(50)    | 1<br>(50)     |   |              |              | 2<br>(100)    | 1<br>(50)    | 1<br>(50)    |               | 2<br>(100)   |               |           |              | 2<br>(100)   |               |
|      | Elderly                   | 14<br>(100) |   | 14<br>(100) |   | 7<br>(50)    | 2<br>(14.29) | 5<br>(35.71) | 13<br>(100) |   | 6<br>(42.86) | 8<br>(57.14)  |   | 5<br>(35.71) | 1<br>(7.14)  | 8<br>(57.14)  | 1<br>(7.14)  | 2<br>(14.29) | 11<br>(78.57) | 1<br>(7.14)  | 13<br>(92.86) |           | 2<br>(14.29) | 1<br>(7.14)  | 11<br>(78.57) |
|      | Outpatient                | 8<br>(100)  |   | 8<br>(100)  |   | 2<br>(25)    | 1<br>(12.5)  | 5<br>(62.5)  | 7<br>(100)  |   | 1<br>(12.5)  | 7<br>(87.5)   |   | 1<br>(12.5)  |              | 7<br>(87.5)   |              | 8<br>(100)   |               | 8<br>(100)   |               |           |              | 8<br>(100)   |               |
|      | Inpatient                 | 10<br>(100) |   | 10<br>(100) |   | 7<br>(70)    | 2<br>(20)    | 1<br>(10)    | 10<br>(100) |   | 7<br>(70)    | 3<br>(30)     |   | 5<br>(50)    | 1<br>(10)    | 4<br>(40)     | 2<br>(20)    | 2<br>(20)    | 6<br>(60)     | 1<br>(10)    | 9<br>(90)     |           | 2<br>(20)    | 1<br>(10)    | 7<br>(70)     |
|      | Men                       | 7<br>(100)  |   | 7<br>(100)  |   | 4<br>(57.14) | 1<br>(14.29) | 2<br>(28.57) | 7<br>(100)  |   | 3<br>(42.86) | 4<br>(57.14)  |   | 2<br>(28.57) | 1<br>(14.29) | 4<br>(57.14)  | 1<br>(14.29) | 1<br>(14.29) | 5<br>(71.43)  | 1<br>(14.29) | 6<br>(85.71)  |           | 1<br>(14.29) |              | 6<br>(85.71)  |
|      | Women                     | 11<br>(100) |   | 11<br>(100) |   | 5<br>(45.45) | 2<br>(18.18) | 4<br>(36.36) | 10<br>(100) |   | 5<br>(45.45) | 6<br>(54.55)  |   | 4<br>(36.36) |              | 7<br>(63.64)  | 1<br>(9.09)  | 1<br>(9.09)  | 9<br>(81.82)  |              | 11<br>(100)   |           | 1<br>(9.09)  | 1<br>(9.09)  | 9<br>(81.82)  |

AMC= Amoxicillin-clavulanic acid AMP=Ampicillin CXM=Cefuroxime FOX=Cefoxitin CTX=Cefotaxime CAZ=Ceftazidime FEP=Cefepime IPM=Imipenem TZP=Piperacillin-tazobactam.

Table S48: Resistances to beta-lactams (%) of *Citrobacter freundii* in 2018.

|      |                           | AMC         |   | AMP           |              |   | CXM          |              |              | FOX         |   | CTX          |               | CAZ          |               | FEP          |             |               | IPM         |   | TZP          |               |   |
|------|---------------------------|-------------|---|---------------|--------------|---|--------------|--------------|--------------|-------------|---|--------------|---------------|--------------|---------------|--------------|-------------|---------------|-------------|---|--------------|---------------|---|
|      |                           | R           | S | R             | I            | S | R            | I            | S            | R           | S | R            | S             | R            | S             | R            | I           | S             | R           | S | R            | I             | S |
| 2018 | Total                     | 25<br>(100) |   | 24<br>(96)    | 1<br>(4)     |   | 7<br>(28)    | 6<br>(24)    | 12<br>(48)   | 25<br>(100) |   | 5<br>(20.83) | 19<br>(79.17) | 6<br>(24)    | 19<br>(76)    | 2<br>(8)     | 1<br>(4)    | 22<br>(88)    | 24<br>(100) |   | 3<br>(12)    | 22<br>(88)    |   |
|      | Permanent catheterization | 6<br>(100)  |   | 6<br>(100)    |              |   | 1<br>(16.67) | 2<br>(33.33) | 3<br>(50)    | 6<br>(100)  |   | 1<br>(20)    | 4<br>(80)     | 1<br>(16.67) | 5<br>(83.33)  |              |             | 6<br>(100)    | 6<br>(100)  |   | 1<br>(16.67) | 5<br>(83.33)  |   |
|      | Clean catch midstream     | 12<br>(100) |   | 12<br>(100)   |              |   | 4<br>(33.33) | 1<br>(8.33)  | 7<br>(58.33) | 12<br>(100) |   | 2<br>(16.67) | 10<br>(83.33) | 2<br>(16.67) | 10<br>(83.33) |              | 1<br>(8.33) | 11<br>(91.67) | 11<br>(100) |   | 1<br>(8.33)  | 11<br>(91.67) |   |
|      | Urinary catheter          | 7<br>(100)  |   | 6<br>(85.71)  | 1<br>(14.29) |   | 2<br>(28.57) | 3<br>(42.86) | 2<br>(28.57) | 7<br>(100)  |   | 2<br>(28.57) | 5<br>(71.43)  | 3<br>(42.86) | 4<br>(57.14)  | 2<br>(28.57) |             | 5<br>(71.43)  | 7<br>(100)  |   | 1<br>(14.29) | 6<br>(85.71)  |   |
|      | Adults                    | 5<br>(100)  |   | 5<br>(100)    |              |   |              | 1<br>(20)    | 4<br>(80)    | 5<br>(100)  |   |              | 5<br>(100)    |              | 5<br>(100)    |              |             | 5<br>(100)    | 5<br>(100)  |   |              | 5<br>(100)    |   |
|      | Elderly                   | 20<br>(100) |   | 19<br>(95)    | 1<br>(5)     |   | 7<br>(35)    | 5<br>(25)    | 8<br>(40)    | 20<br>(100) |   | 5<br>(26.32) | 14<br>(73.68) | 6<br>(30)    | 14<br>(70)    | 2<br>(10)    | 1<br>(5)    | 17<br>(85)    | 19<br>(100) |   | 3<br>(15)    | 17<br>(85)    |   |
|      | Outpatient                | 8<br>(100)  |   | 8<br>(100)    |              |   | 3<br>(27.5)  | 2<br>(25)    | 3<br>(37.5)  | 8<br>(100)  |   | 3<br>(42.86) | 4<br>(57.14)  | 3<br>(37.5)  | 5<br>(62.5)   | 1<br>(12.5)  | 1<br>(12.5) | 6<br>(75)     | 8<br>(100)  |   | 2<br>(25)    | 6<br>(75)     |   |
|      | Inpatient                 | 17<br>(100) |   | 16<br>(94.12) | 1<br>(5.88)  |   | 4<br>(23.53) | 4<br>(23.53) | 9<br>(52.94) | 17<br>(100) |   | 2<br>(11.76) | 15<br>(88.24) | 3<br>(17.65) | 14<br>(82.35) | 1<br>(5.88)  |             | 16<br>(94.12) | 16<br>(100) |   | 1<br>(5.88)  | 16<br>(94.12) |   |
|      | Men                       | 10<br>(100) |   | 10<br>(100)   |              |   | 2<br>(20)    | 1<br>(10)    | 7<br>(70)    | 10<br>(100) |   | 1<br>(11.11) | 8<br>(88.89)  | 1<br>(10)    | 9<br>(90)     |              |             | 10<br>(100)   | 9<br>(100)  |   |              | 10<br>(100)   |   |
|      | Women                     | 15<br>(100) |   | 14<br>(93.33) | 1<br>(6.67)  |   | 5<br>(33.33) | 5<br>(33.33) | 5<br>(33.33) | 15<br>(100) |   | 4<br>(26.67) | 11<br>(73.33) | 5<br>(33.33) | 10<br>(66.67) | 2<br>(13.33) | 1<br>(6.67) | 12<br>(80)    | 15<br>(100) |   | 3<br>(20)    | 12<br>(80)    |   |

AMC= Amoxicillin-clavulanic acid AMP=Ampicillin CXM=Cefuroxime FOX=Cefoxitin CTX=Cefotaxime CAZ=Ceftazidime FEP=Cefepime IPM=Imipenem TZP=Piperacillin-tazobactam.

Table S49: Resistances to beta-lactams (%) of *Citrobacter freundii* in 2019.

|       |                           | AMC         |             | AMP         |              | TIC          |               | CXM          |               | FOX         |               | CFM           |              | CTX           |              |               | CAZ           |              |               | FEP           |               | IPM           |               |              | ETP           |               |              | TZP          |               |   |
|-------|---------------------------|-------------|-------------|-------------|--------------|--------------|---------------|--------------|---------------|-------------|---------------|---------------|--------------|---------------|--------------|---------------|---------------|--------------|---------------|---------------|---------------|---------------|---------------|--------------|---------------|---------------|--------------|--------------|---------------|---|
|       |                           | R           | S           | R           | S            | R            | S             | R            | S             | R           | S             | R             | S            | R             | I            | S             | R             | I            | S             | R             | S             | R             | I             | S            | R             | I             | S            | R            | I             | S |
| 2019  | Total                     | 27<br>(100) |             | 27<br>(100) |              | 12<br>(48)   | 13<br>(52)    | 9<br>(33.33) | 18<br>(66.67) | 26<br>(100) |               | 18<br>(75)    | 6<br>(25)    | 10<br>(37.04) | 1<br>(3.7)   | 16<br>(59.26) | 10<br>(37.04) | 3<br>(11.11) | 14<br>(51.85) | 7<br>(25.93)  | 20<br>(74.07) | 1<br>(3.7)    | 26<br>(96.29) | 1<br>(4)     | 1<br>(4)      | 23<br>(92)    | 5<br>(18.52) | 1<br>(3.7)   | 21<br>(77.78) |   |
|       | Permanent catheterization | 3<br>(100)  |             | 3<br>(100)  |              | 3<br>(100)   |               | 2<br>(66.67) | 1<br>(33.33)  | 2<br>(100)  |               | 3<br>(100)    |              | 2<br>(66.67)  |              | 1<br>(33.33)  | 3<br>(100)    |              |               | 2<br>(66.67)  | 1<br>(33.33)  |               | 2<br>(66.67)  | 1<br>(33.33) |               | 2<br>(66.67)  |              |              |               |   |
|       | Clean catch midstream     | 19<br>(100) |             | 19<br>(100) |              | 6<br>(35.29) | 11<br>(64.71) | 4<br>(21.05) | 15<br>(78.95) | 19<br>(100) |               | 10<br>(62.5)  | 6<br>(37.5)  | 4<br>(21.05)  | 1<br>(5.26)  | 14<br>(73.68) | 4<br>(21.05)  | 2<br>(10.53) | 13<br>(68.42) | 2<br>(10.53)  | 17<br>(89.47) | 1<br>(5.26)   | 18<br>(94.74) |              | 1<br>(5.88)   | 16<br>(94.12) | 2<br>(10.53) |              | 17<br>(89.47) |   |
|       | Urinary catheter          | 5<br>(100)  |             | 5<br>(100)  |              | 3<br>(60)    | 2<br>(40)     | 3<br>(60)    | 2<br>(40)     | 5<br>(100)  |               | 5<br>(100)    |              | 4<br>(80)     |              | 1<br>(20)     | 3<br>(60)     | 1<br>(20)    | 1<br>(20)     | 3<br>(60)     | 2<br>(40)     |               | 5<br>(100)    |              | 5<br>(100)    | 2<br>(40)     | 1<br>(20)    | 2<br>(40)    |               |   |
|       | Children                  | 2<br>(100)  |             | 2<br>(100)  |              | 1<br>(50)    | 1<br>(50)     | 1<br>(50)    | 1<br>(50)     | 2<br>(100)  |               | 1<br>(50)     | 1<br>(50)    | 1<br>(50)     |              | 1<br>(50)     | 1<br>(50)     |              | 1<br>(50)     | 2<br>(100)    |               | 2<br>(100)    |               | 2<br>(100)   |               | 2<br>(100)    |              |              |               |   |
|       | Adults                    | 10<br>(100) |             | 10<br>(100) |              | 4<br>(44.44) | 5<br>(55.56)  | 4<br>(40)    | 6<br>(60)     | 10<br>(100) |               | 6<br>(66.67)  | 3<br>(33.33) | 6<br>(60)     |              | 4<br>(40)     | 5<br>(50)     |              | 5<br>(50)     | 3<br>(30)     | 7<br>(70)     | 1<br>(10)     | 9<br>(90)     |              | 1<br>(11.11)  | 8<br>(88.89)  | 2<br>(20)    | 1<br>(10)    | 7<br>(70)     |   |
|       | Elderly                   | 15<br>(100) |             | 15<br>(100) |              | 7<br>(50)    | 7<br>(50)     | 4<br>(26.67) | 11<br>(73.33) | 14<br>(100) |               | 11<br>(84.62) | 2<br>(15.38) | 3<br>(20)     | 1<br>(6.67)  | 11<br>(73.33) | 4<br>(26.67)  | 3<br>(20)    | 8<br>(53.33)  | 4<br>(26.67)  | 11<br>(73.33) |               | 15<br>(100)   | 1<br>(7.14)  |               | 13<br>(92.86) | 3<br>(20)    |              | 12<br>(80)    |   |
|       | Outpatient                | 12<br>(100) |             | 12<br>(100) |              | 3<br>(27.27) | 8<br>(72.73)  |              | 12<br>(100)   | 11<br>(100) |               | 6<br>(60)     | 4<br>(40)    | 1<br>(8.33)   |              | 11<br>(91.67) | 1<br>(8.33)   |              | 11<br>(91.67) | 1<br>(8.33)   | 11<br>(91.67) |               | 12<br>(100)   | 1<br>(9.09)  |               | 10<br>(90.91) | 1<br>(8.33)  |              | 11<br>(91.67) |   |
|       | Inpatient                 | 15<br>(100) |             | 15<br>(100) |              | 9<br>(64.29) | 5<br>(35.71)  | 9<br>(60)    | 6<br>(40)     | 15<br>(100) |               | 12<br>(85.71) | 2<br>(14.29) | 9<br>(60)     | 1<br>(6.67)  | 5<br>(33.33)  | 9<br>(60)     | 3<br>(20)    | 3<br>(20)     | 6<br>(40)     | 9<br>(60)     | 1<br>(6.67)   | 14<br>(93.33) |              | 1<br>(7.14)   | 13<br>(92.86) | 4<br>(26.67) | 1<br>(6.67)  | 10<br>(66.67) |   |
|       | Men                       | 13<br>(100) |             | 13<br>(100) |              | 4<br>(36.36) | 7<br>(63.64)  | 4<br>(30.77) | 9<br>(69.23)  | 12<br>(100) |               | 6<br>(54.55)  | 5<br>(45.45) | 5<br>(38.46)  |              | 8<br>(61.54)  | 5<br>(38.46)  |              | 8<br>(61.54)  | 3<br>(23.08)  | 10<br>(76.92) |               | 13<br>(100)   | 1<br>(9.09)  |               | 10<br>(90.91) | 1<br>(7.69)  |              | 12<br>(92.31) |   |
| Women | 14<br>(100)               |             | 14<br>(100) |             | 8<br>(57.14) | 6<br>(42.86) | 5<br>(35.71)  | 9<br>(64.29) | 14<br>(100)   |             | 12<br>(92.31) | 1<br>(7.69)   | 5<br>(35.71) | 1<br>(7.14)   | 8<br>(57.14) | 5<br>(35.71)  | 3<br>(21.43)  | 6<br>(42.86) | 4<br>(28.57)  | 10<br>(71.43) |               | 13<br>(92.86) |               | 1<br>(7.14)  | 13<br>(92.86) | 4<br>(28.57)  | 1<br>(7.14)  | 9<br>(64.29) |               |   |

AMC= Amoxicillin-clavulanic acid AMP=Ampicillin CXM=Cefuroxime FOX=Cefoxitin CTX=Cefotaxime CAZ=Ceftazidime FEP=Cefepime IPM=Imipenem ETP=Ertapenem TZP=Piperacillin-tazobactam.



Table S50: Resistances to beta-lactams (%) of *Citrobacter freundii* in 2020.

|      |                           | AMC         |   | AMP         |   | TIC          |               | CXM          |               | FOX         |   | CFM           |              | CTX          |              | CAZ          |              | FEP          |               | IPM         |   | ETP          |               | TZP          |             |               |
|------|---------------------------|-------------|---|-------------|---|--------------|---------------|--------------|---------------|-------------|---|---------------|--------------|--------------|--------------|--------------|--------------|--------------|---------------|-------------|---|--------------|---------------|--------------|-------------|---------------|
|      |                           | R           | S | R           | S | R            | S             | R            | S             | R           | S | R             | S            | R            | S            | R            | S            | R            | S             | R           | S | R            | S             | R            | I           | S             |
|      |                           |             |   |             |   |              |               |              |               |             |   |               |              |              |              |              |              |              |               |             |   |              |               |              |             |               |
| 2020 | Total                     | 17<br>(100) |   | 17<br>(100) |   | 7<br>(41.18) | 10<br>(58.82) | 5<br>(29.41) | 12<br>(70.59) | 17<br>(100) |   | 13<br>(76.47) | 4<br>(23.53) | 6<br>(37.5)  | 10<br>(62.5) | 4<br>(25)    | 12<br>(75)   | 2<br>(11.76) | 15<br>(88.24) | 17<br>(100) |   | 1<br>(5.88)  | 16<br>(94.12) | 1<br>(5.88)  | 1<br>(5.88) | 15<br>(88.24) |
|      | Permanent catheterization | 2<br>(100)  |   | 2<br>(100)  |   | 1<br>(50)    | 1<br>(50)     |              | 2<br>(100)    | 2<br>(100)  |   | 2<br>(100)    |              |              | 1<br>(100)   |              | 1<br>(100)   | 2<br>(100)   |               | 2<br>(100)  |   |              | 2<br>(100)    |              |             | 2<br>(100)    |
|      | Clean catch midstream     | 12<br>(100) |   | 12<br>(100) |   | 6<br>(50)    | 6<br>(50)     | 5<br>(41.67) | 7<br>(58.33)  | 12<br>(100) |   | 9<br>(75)     | 3<br>(25)    | 5<br>(41.67) | 7<br>(58.33) | 5<br>(41.67) | 7<br>(58.33) | 2<br>(16.67) | 10<br>(83.33) | 12<br>(100) |   | 1<br>(8.33)  | 11<br>(91.67) | 1<br>(8.33)  | 1<br>(8.33) | 10<br>(83.33) |
|      | Urinary catheter          | 3<br>(100)  |   | 3<br>(100)  |   |              | 3<br>(100)    |              | 3<br>(100)    | 3<br>(100)  |   | 2<br>(66.67)  | 1<br>(33.33) | 1<br>(33.33) | 2<br>(66.67) |              | 3<br>(100)   |              | 3<br>(100)    | 3<br>(100)  |   |              | 3<br>(100)    |              |             | 3<br>(100)    |
|      | Children                  | 1<br>(100)  |   | 1<br>(100)  |   |              | 1<br>(100)    |              | 1<br>(100)    | 1<br>(100)  |   | 1<br>(100)    |              | 1<br>(100)   |              |              | 1<br>(100)   | 1<br>(100)   |               | 1<br>(100)  |   |              | 1<br>(100)    |              |             | 1<br>(100)    |
|      | Adults                    | 3<br>(100)  |   | 3<br>(100)  |   | 1<br>(33.33) | 2<br>(66.67)  | 1<br>(33.33) | 2<br>(66.67)  | 3<br>(100)  |   | 2<br>(66.67)  | 1<br>(33.33) | 1<br>(33.33) | 2<br>(66.67) | 1<br>(25)    | 2<br>(66.67) | 1<br>(33.33) | 2<br>(66.67)  | 3<br>(100)  |   | 1<br>(33.33) | 2<br>(66.67)  | 1<br>(33.33) |             | 2<br>(66.67)  |
|      | Elderly                   | 13<br>(100) |   | 13<br>(100) |   | 6<br>(46.15) | 7<br>(53.85)  | 4<br>(30.77) | 9<br>(69.23)  | 13<br>(100) |   | 10<br>(76.92) | 3<br>(23.08) | 4<br>(33.33) | 8<br>(66.67) | 3<br>(25)    | 9<br>(75)    | 1<br>(7.69)  | 12<br>(92.31) | 13<br>(100) |   |              | 13<br>(100)   |              | 1<br>(7.69) | 12<br>(92.31) |
|      | Outpatient                | 4<br>(100)  |   | 4<br>(100)  |   | 1<br>(25)    | 3<br>(75)     |              | 4<br>(100)    | 4<br>(100)  |   | 2<br>(50)     | 2<br>(50)    |              | 4<br>(100)   |              | 4<br>(100)   | 4<br>(100)   |               | 4<br>(100)  |   |              | 4<br>(100)    |              |             | 4<br>(100)    |
|      | Inpatient                 | 13<br>(100) |   | 13<br>(100) |   | 6<br>(46.15) | 7<br>(53.85)  | 5<br>(38.46) | 8<br>(61.54)  | 13<br>(100) |   | 11<br>(84.62) | 2<br>(15.38) | 6<br>(50)    | 6<br>(50)    | 4<br>(33.33) | 8<br>(66.67) | 2<br>(15.38) | 11<br>(84.62) | 13<br>(100) |   | 1<br>(7.69)  | 12<br>(92.31) | 1<br>(7.69)  | 1<br>(7.69) | 11<br>(84.62) |
|      | Men                       | 4<br>(100)  |   | 4<br>(100)  |   | 2<br>(50)    | 2<br>(50)     | 1<br>(25)    | 3<br>(75)     | 4<br>(100)  |   | 2<br>(50)     | 2<br>(50)    | 1<br>(25)    | 3<br>(75)    | 1<br>(25)    | 3<br>(75)    | 1<br>(25)    | 3<br>(75)     | 4<br>(100)  |   | 1<br>(25)    | 3<br>(75)     | 1<br>(25)    |             | 3<br>(75)     |
|      | Women                     | 13<br>(100) |   | 13<br>(100) |   | 5<br>(38.46) | 8<br>(61.54)  | 4<br>(30.77) | 9<br>(69.23)  | 13<br>(100) |   | 11<br>(84.62) | 2<br>(15.38) | 5<br>(41.67) | 7<br>(58.33) | 3<br>(25)    | 9<br>(75)    | 1<br>(7.69)  | 12<br>(92.31) | 13<br>(100) |   |              | 13<br>(100)   |              | 1<br>(7.69) | 12<br>(92.31) |

AMC= Amoxicillin-clavulanic acid AMP=Ampicillin CXM=Cefuroxime FOX=Cefoxitin CTX=Cefotaxime CAZ=Ceftazidime FEP=Cefepime IPM=Imipenem ETP=Ertapenem TZP=Piperacillin-tazobactam.

Table S51: Resistances to beta-lactams (%) of *Citrobacter freundii* in 2021.

|      |                           | AMC        |   | AMP        |   | TIC          |              | CXM          |              | FOX        |   | CFM          |              | CTX          |              | CAZ          |              | FEP          |              | IPM        |   | ETP          |              | TZP          |              |              |
|------|---------------------------|------------|---|------------|---|--------------|--------------|--------------|--------------|------------|---|--------------|--------------|--------------|--------------|--------------|--------------|--------------|--------------|------------|---|--------------|--------------|--------------|--------------|--------------|
|      |                           | R          | S | R          | S | R            | S            | R            | S            | R          | S | R            | S            | R            | S            | R            | S            | R            | S            | R          | S | R            | S            | R            | I            | S            |
| 2021 | Total                     | 8<br>(100) |   | 8<br>(100) |   | 7<br>(87.5)  | 1<br>(12.5)  | 5<br>(62.5)  | 3<br>(37.5)  | 8<br>(100) |   | 6<br>(75)    | 2<br>(25)    | 5<br>(62.5)  | 3<br>(37.5)  | 5<br>(62.5)  | 3<br>(37.5)  | 3<br>(37.5)  | 5<br>(62.5)  | 7<br>(100) |   | 1<br>(12.5)  | 7<br>(87.5)  | 1<br>(12.5)  | 1<br>(12.5)  | 6<br>(75)    |
|      | Permanent catheterization | 2<br>(100) |   | 2<br>(100) |   | 2<br>(100)   |              | 1<br>(50)    | 1<br>(50)    | 2<br>(100) |   | 1<br>(50)    | 1<br>(100) |   |              | 2<br>(100)   |              | 1<br>(50)    | 1<br>(50)    |
|      | Clean catch midstream     | 6<br>(100) |   | 6<br>(100) |   | 5<br>(83.33) | 1<br>(16.67) | 4<br>(66.67) | 2<br>(33.33) | 6<br>(100) |   | 5<br>(83.33) | 1<br>(16.67) | 4<br>(66.67) | 2<br>(33.33) | 4<br>(66.67) | 2<br>(33.33) | 2<br>(33.33) | 4<br>(66.67) | 6<br>(100) |   | 1<br>(16.67) | 5<br>(83.33) | 1<br>(16.67) |              | 5<br>(83.33) |
|      | Adults                    | 2<br>(100) |   | 2<br>(100) |   | 2<br>(100)   |              | 1<br>(50)    | 1<br>(50)    | 2<br>(100) |   | 2<br>(100)   |              | 2<br>(100)   |              | 2<br>(100)   |              | 1<br>(50)    | 1<br>(50)    | 2<br>(100) |   | 1<br>(50)    | 1<br>(50)    | 1<br>(50)    |              | 1<br>(50)    |
|      | Elderly                   | 6<br>(100) |   | 6<br>(100) |   | 5<br>(83.33) | 1<br>(16.67) | 4<br>(66.67) | 2<br>(33.33) | 6<br>(100) |   | 4<br>(66.67) | 2<br>(33.33) | 3<br>(50)    | 3<br>(50)    | 3<br>(50)    | 3<br>(50)    | 2<br>(33.33) | 4<br>(66.67) | 5<br>(100) |   |              | 6<br>(100)   |              | 1<br>(16.67) | 5<br>(83.33) |
|      | Outpatient                | 4<br>(100) |   | 4<br>(100) |   | 3<br>(75)    | 1<br>(25)    | 3<br>(75)    | 1<br>(25)    | 4<br>(100) |   | 3<br>(75)    | 1<br>(25)    | 3<br>(75)    | 1<br>(25)    | 3<br>(75)    | 1<br>(25)    | 2<br>(50)    | 2<br>(50)    | 4<br>(100) |   | 1<br>(25)    | 3<br>(75)    | 1<br>(25)    |              | 3<br>(75)    |
|      | Inpatient                 | 4<br>(100) |   | 4<br>(100) |   | 4<br>(100)   |              | 2<br>(50)    | 2<br>(50)    | 4<br>(100) |   | 3<br>(75)    | 1<br>(25)    | 2<br>(50)    | 2<br>(50)    | 2<br>(50)    | 2<br>(50)    | 1<br>(25)    | 3<br>(75)    | 3<br>(100) |   |              | 4<br>(100)   |              | 1<br>(25)    | 3<br>(75)    |
|      | Men                       | 2<br>(100) |   | 2<br>(100) |   | 2<br>(100)   |              | 1<br>(50)    | 1<br>(50)    | 2<br>(100) |   | 1<br>(50)    | 1<br>(100) |   | 1<br>(50)    | 1<br>(50)    | 1<br>(50)    |              | 1<br>(50)    |
|      | Women                     | 6<br>(100) |   | 6<br>(100) |   | 5<br>(83.33) | 1<br>(16.67) | 4<br>(66.67) | 2<br>(33.33) | 6<br>(100) |   | 5<br>(83.33) | 1<br>(16.67) | 4<br>(66.67) | 2<br>(33.33) | 4<br>(66.67) | 2<br>(33.33) | 2<br>(33.33) | 4<br>(66.67) | 6<br>(100) |   |              | 6<br>(100)   |              | 1<br>(16.67) | 5<br>(83.33) |

AMC= Amoxicillin-clavulanic acid AMP=Ampicillin CXM=Cefuroxime FOX=Cefoxitin CTX=Cefotaxime CAZ=Ceftazidime FEP=Cefepime IPM=Imipenem ETP=Ertapenem TZP=Piperacillin-tazobactam.

Table S52: Resistances to non-beta-lactams (%) of *Citrobacter freundii* in 2016.

|      |                           | TOB |             | GEN |             | NAL          |               | CIP |              |               | FOF |             | NIT |              |               | SXT          |               |
|------|---------------------------|-----|-------------|-----|-------------|--------------|---------------|-----|--------------|---------------|-----|-------------|-----|--------------|---------------|--------------|---------------|
|      |                           | R   | S           | R   | S           | R            | S             | R   | I            | S             | R   | S           | R   | I            | S             | R            | S             |
| 2016 | Total                     |     | 12<br>(100) |     | 12<br>(100) | 1<br>(8.33)  | 11<br>(91.67) |     | 1<br>(8.33)  | 11<br>(91.67) |     | 12<br>(100) |     | 1<br>(8.33)  | 11<br>(91.67) | 1<br>(8.33)  | 11<br>(91.67) |
|      | Permanent catheterization |     | 4<br>(100)  |     | 4<br>(100)  | 1<br>(25)    | 3<br>(75)     |     | 1<br>(25)    | 3<br>(75)     |     | 4<br>(100)  |     | 1<br>(25)    | 3<br>(75)     |              | 4<br>(100)    |
|      | Clean catch midstream     |     | 6<br>(100)  |     | 6<br>(100)  |              | 6<br>(100)    |     |              | 6<br>(100)    |     | 6<br>(100)  |     |              | 6<br>(100)    | 1<br>(16.67) | 5<br>(83.33)  |
|      | Urinary catheter          |     | 2<br>(100)  |     | 2<br>(100)  |              | 2<br>(100)    |     |              | 2<br>(100)    |     | 2<br>(100)  |     |              | 2<br>(100)    |              | 2<br>(100)    |
|      | Adults                    |     | 4<br>(100)  |     | 4<br>(100)  |              | 4<br>(100)    |     | 1<br>(25)    | 3<br>(75)     |     | 4<br>(100)  |     | 1<br>(25)    | 3<br>(75)     |              | 4<br>(100)    |
|      | Elderly                   |     | 8<br>(100)  |     | 8<br>(100)  | 1<br>(12.5)  | 7<br>(87.5)   |     |              | 8<br>(100)    |     | 8<br>(100)  |     |              | 8<br>(100)    | 1<br>(12.5)  | 7<br>(87.5)   |
|      | Outpatient                |     | 8<br>(100)  |     | 8<br>(100)  |              | 8<br>(100)    |     | 1<br>(12.5)  | 7<br>(87.5)   |     | 8<br>(100)  |     | 1<br>(12.5)  | 7<br>(87.5)   | 1<br>(12.5)  | 7<br>(87.5)   |
|      | Inpatient                 |     | 4<br>(100)  |     | 4<br>(100)  | 1<br>(25)    | 3<br>(75)     |     |              | 4<br>(100)    |     | 4<br>(100)  |     |              | 4<br>(100)    |              | 4<br>(100)    |
|      | Men                       |     | 6<br>(100)  |     | 6<br>(100)  | 1<br>(16.67) | 5<br>(83.33)  |     |              | 6<br>(100)    |     | 6<br>(100)  |     |              | 6<br>(100)    |              | 6<br>(100)    |
|      | Women                     |     | 6<br>(100)  |     | 6<br>(100)  |              | 6<br>(100)    |     | 1<br>(16.67) | 5<br>(83.33)  |     | 6<br>(100)  |     | 1<br>(16.67) | 5<br>(83.33)  | 1<br>(16.67) | 5<br>(83.33)  |

TOB=Tobramycin GEN=Gentamicin NAL=Nalidixic acid CIP=Ciprofloxacin FOF=Fosfomycin NIT=Nitrofurantoin SXT=Trimethoprim-sulfamethoxazole

Table S53: Resistances to non-beta-lactams (%) of *Citrobacter freundii* in 2017.

|      |                           | TOB          |               | GEN          |              |               | NAL          |               | CIP          |             |               | FOF         |   | NIT         |   | SXT          |               |
|------|---------------------------|--------------|---------------|--------------|--------------|---------------|--------------|---------------|--------------|-------------|---------------|-------------|---|-------------|---|--------------|---------------|
|      |                           | R            | S             | R            | I            | S             | R            | S             | R            | I           | S             | R           | S | R           | S | R            | S             |
| 2017 | Total                     | 1<br>(5.56)  | 17<br>(94.44) | 1<br>(5.56)  | 1<br>(5.56)  | 16<br>(88.89) | 6<br>(33.33) | 12<br>(66.67) | 5<br>(27.78) | 1<br>(5.56) | 12<br>(66.67) | 18<br>(100) |   | 18<br>(100) |   | 3<br>(16.67) | 15<br>(83.33) |
|      | Collection bag            |              | 1<br>(100)    |              |              | 1<br>(100)    |              | 1<br>(100)    |              |             | 1<br>(100)    | 1<br>(100)  |   | 1<br>(100)  |   | 1<br>(100)   |               |
|      | Nephrostomy catheter      |              | 1<br>(100)    |              |              | 1<br>(100)    | 1<br>(100)   |               |              | 1<br>(100)  |               | 1<br>(100)  |   | 1<br>(100)  |   | 1<br>(100)   |               |
|      | Permanent catheterization |              | 2<br>(100)    |              |              | 2<br>(100)    | 1<br>(50)    | 1<br>(50)     | 1<br>(50)    |             | 1<br>(50)     | 2<br>(100)  |   | 2<br>(100)  |   | 1<br>(50)    | 1<br>(50)     |
|      | Clean catch midstream     | 1<br>(9.09)  | 10<br>(90.91) | 1<br>(9.09)  |              | 10<br>(90.91) | 4<br>(36.36) | 7<br>(63.64)  | 4<br>(36.36) |             | 7<br>(63.64)  | 11<br>(100) |   | 11<br>(100) |   | 2<br>(18.18) | 9<br>(90.91)  |
|      | Urinary catheter          |              | 3<br>(100)    |              | 1<br>(33.33) | 2<br>(66.67)  |              | 3<br>(100)    |              |             | 3<br>(100)    | 3<br>(100)  |   | 3<br>(100)  |   | 3<br>(100)   |               |
|      | Children                  |              | 2<br>(100)    |              |              | 2<br>(100)    |              | 2<br>(100)    |              |             | 2<br>(100)    | 2<br>(100)  |   | 2<br>(100)  |   | 2<br>(100)   |               |
|      | Adults                    |              | 2<br>(100)    |              |              | 2<br>(100)    | 2<br>(100)   |               | 2<br>(100)   |             |               | 2<br>(100)  |   | 2<br>(100)  |   | 1<br>(50)    | 1<br>(50)     |
|      | Elderly                   | 1<br>(7.14)  | 13<br>(92.86) | 1<br>(7.14)  | 1<br>(7.14)  | 12<br>(85.71) | 4<br>(28.57) | 10<br>(71.43) | 3<br>(21.43) | 1<br>(7.14) | 10<br>(71.43) | 14<br>(100) |   | 14<br>(100) |   | 2<br>(14.29) | 12<br>(85.71) |
|      | Outpatient                |              | 8<br>(100)    |              |              | 8<br>(100)    | 1<br>(12.5)  | 7<br>(87.5)   |              | 1<br>(12.5) | 7<br>(87.5)   | 8<br>(100)  |   | 8<br>(100)  |   | 8<br>(100)   |               |
|      | Inpatient                 | 1<br>(10)    | 9<br>(90)     | 1<br>(10)    | 1<br>(10)    | 8<br>(80)     | 5<br>(50)    | 5<br>(50)     | 5<br>(50)    |             | 5<br>(50)     | 10<br>(100) |   | 10<br>(100) |   | 3<br>(100)   | 7<br>(70)     |
|      | Men                       | 1<br>(14.29) | 6<br>(85.71)  | 1<br>(14.29) |              | 6<br>(85.71)  | 2<br>(28.57) | 5<br>(71.43)  | 2<br>(28.57) |             | 5<br>(71.43)  | 7<br>(100)  |   | 7<br>(100)  |   | 2<br>(28.57) | 5<br>(71.43)  |
|      | Women                     |              | 11<br>(100)   |              | 1<br>(9.09)  | 10<br>(90.91) | 4<br>(36.36) | 7<br>(63.64)  | 3<br>(27.27) | 1<br>(9.09) | 7<br>(63.64)  | 11<br>(100) |   | 11<br>(100) |   | 1<br>(9.09)  | 10<br>(90.91) |

TOB=Tobramycin GEN=Gentamicin NAL=Nalidixic acid CIP=Ciprofloxacin FOF=Fosfomycin NIT=Nitrofurantoin SXT=Trimethoprim-sulfamethoxazole

Table S54: Resistances to non-beta-lactams (%) of *Citrobacter freundii* in 2018.

|      |                           | TOB          |               | GEN          |               | NAL          |               | CIP          |               | FOF         |               | NIT          |               | SXT          |               |
|------|---------------------------|--------------|---------------|--------------|---------------|--------------|---------------|--------------|---------------|-------------|---------------|--------------|---------------|--------------|---------------|
|      |                           | R            | S             | R            | S             | R            | S             | R            | S             | R           | S             | R            | S             | R            | S             |
| 2018 | Total                     | 1<br>(4)     | 24<br>(96)    | 1<br>(4)     | 24<br>(96)    | 5<br>(20)    | 20<br>(80)    | 4<br>(16)    | 21<br>(84)    | 1<br>(4)    | 24<br>(96)    | 1<br>(4)     | 24<br>(96)    | 2<br>(8)     | 23<br>(92)    |
|      | Permanent catheterization |              | 6<br>(100)    |              | 6<br>(100)    |              | 6<br>(100)    |              | 6<br>(100)    |             | 6<br>(100)    |              | 6<br>(100)    |              | 6<br>(100)    |
|      | Clean catch midstream     |              | 12<br>(100)   |              | 12<br>(100)   | 2<br>(16.67) | 10<br>(83.33) | 2<br>(16.67) | 10<br>(83.33) | 1<br>(8.33) | 11<br>(91.67) |              | 12<br>(100)   | 1<br>(8.33)  | 11<br>(91.67) |
|      | Urinary catheter          | 1<br>(14.29) | 6<br>(85.71)  | 1<br>(14.29) | 6<br>(85.71)  | 3<br>(42.86) | 4<br>(57.14)  | 2<br>(28.57) | 5<br>(71.43)  |             | 7<br>(100)    | 1<br>(14.29) | 6<br>(85.71)  | 1<br>(14.29) | 6<br>(85.71)  |
|      | Adults                    |              | 5<br>(100)    |              | 5<br>(100)    | 1<br>(20)    | 4<br>(80)     |              | 5<br>(100)    | 1<br>(20)   | 4<br>(80)     |              | 5<br>(100)    | 1<br>(20)    | 4<br>(80)     |
|      | Elderly                   | 1<br>(5)     | 19<br>(95)    | 1<br>(5)     | 19<br>(95)    | 4<br>(20)    | 16<br>(80)    | 4<br>(20)    | 16<br>(80)    |             | 20<br>(100)   | 1<br>(5)     | 19<br>(95)    | 1<br>(5)     | 19<br>(95)    |
|      | Outpatient                |              | 8<br>(100)    |              | 8<br>(100)    | 1<br>(12.5)  | 7<br>(87.5)   | 1<br>(12.5)  | 7<br>(87.5)   |             | 8<br>(100)    |              | 8<br>(100)    |              | 8<br>(100)    |
|      | Inpatient                 | 1<br>(5.88)  | 16<br>(94.12) | 1<br>(5.88)  | 16<br>(94.12) | 4<br>(23.53) | 13<br>(76.47) | 3<br>(17.65) | 14<br>(82.35) | 1<br>(5.88) | 16<br>(94.12) | 1<br>(5.88)  | 16<br>(94.12) | 2<br>(11.76) | 15<br>(88.24) |
|      | Men                       |              | 10<br>(100)   |              | 10<br>(100)   | 2<br>(20)    | 8<br>(80)     | 2<br>(20)    | 8<br>(80)     |             | 10<br>(100)   |              | 10<br>(100)   | 1<br>(10)    | 9<br>(90)     |
|      | Women                     | 1<br>(6.67)  | 14<br>(93.33) | 1<br>(6.67)  | 14<br>(93.33) | 3<br>(20)    | 12<br>(80)    | 2<br>(13.33) | 13<br>(86.67) | 1<br>(6.67) | 14<br>(93.33) | 1<br>(6.67)  | 14<br>(93.33) | 1<br>(6.67)  | 14<br>(93.33) |

TOB=Tobramycin GEN=Gentamicin NAL=Nalidixic acid CIP=Ciprofloxacin FOF=Fosfomicin NIT=Nitrofurantoin SXT=Trimethoprim-sulfamethoxazole

Table S55: Resistances to non-beta-lactams (%) of *Citrobacter freundii* in 2019.

|      |                           | AMK          |               | TOB          |              |               | GEN          |               | NAL          |               | CIP          |              |               | LVX          |             |               | FOF         |   | NIT         |               | SXT          |               | CST          |               |
|------|---------------------------|--------------|---------------|--------------|--------------|---------------|--------------|---------------|--------------|---------------|--------------|--------------|---------------|--------------|-------------|---------------|-------------|---|-------------|---------------|--------------|---------------|--------------|---------------|
|      |                           | R            | S             | R            | I            | S             | R            | S             | R            | S             | R            | I            | S             | R            | I           | S             | R           | S | R           | S             | R            | S             | R            | S             |
| 2019 | Total                     | 2<br>(8)     | 23<br>(92)    | 5<br>(18.52) | 2<br>(7.41)  | 20<br>(74.07) | 6<br>(22.22) | 21<br>(77.78) | 7<br>(25.93) | 20<br>(74.07) | 6<br>(22.22) | 1<br>(3.7)   | 20<br>(74.07) | 5<br>(20)    | 1<br>(4)    | 19<br>(76)    | 27<br>(100) |   | 1<br>(4.55) | 21<br>(5.45)  | 8<br>(29.63) | 19<br>(70.37) | 3<br>(12)    | 22<br>(88)    |
|      | Permanent catheterization | 2<br>(66.67) | 1<br>(33.33)  | 2<br>(66.67) |              | 1<br>(33.33)  | 2<br>(66.67) | 1<br>(33.33)  | 2<br>(66.67) |               | 1<br>(33.33) | 2<br>(66.67) |               |              |             | 3<br>(100)    | 3<br>(100)  |   | 3<br>(100)  |               | 1<br>(33.33) | 2<br>(66.67)  | 1<br>(33.33) | 2<br>(66.67)  |
|      | Clean catch midstream     |              | 17<br>(100)   | 1<br>(5.26)  | 2<br>(10.53) | 16<br>(84.21) | 2<br>(10.53) | 17<br>(89.47) | 4<br>(21.05) | 15<br>(78.95) | 4<br>(21.05) |              | 15<br>(78.95) | 3<br>(17.65) | 1<br>(5.88) | 13<br>(76.47) | 19<br>(100) |   | 1<br>(5.26) | 18<br>(94.74) | 5<br>(26.32) | 14<br>(73.68) | 1<br>(5.88)  | 16<br>(94.12) |
|      | Urinary catheter          |              | 5<br>(100)    | 2<br>(40)    |              | 3<br>(60)     | 2<br>(40)    | 3<br>(60)     | 2<br>(40)    | 3<br>(60)     | 2<br>(40)    |              | 3<br>(60)     | 2<br>(40)    |             | 3<br>(60)     | 5<br>(100)  |   |             |               | 2<br>(40)    | 3<br>(60)     | 1<br>(20)    | 4<br>(80)     |
|      | Children                  |              | 2<br>(100)    |              |              | 2<br>(100)    |              | 2<br>(100)    |              | 2<br>(100)    |              |              | 2<br>(100)    |              |             | 2<br>(100)    | 2<br>(100)  |   | 2<br>(100)  |               | 2<br>(100)   |               |              | 2<br>(100)    |
|      | Adults                    | 1<br>(11.11) | 8<br>(88.89)  | 2<br>(20)    | 1<br>(10)    | 7<br>(70)     | 2<br>(20)    | 8<br>(80)     | 2<br>(20)    | 8<br>(80)     | 2<br>(20)    |              | 8<br>(80)     | 2<br>(22.22) |             | 7<br>(77.78)  | 10<br>(100) |   | 8<br>(100)  |               | 5<br>(50)    | 5<br>(50)     |              | 9<br>(100)    |
|      | Elderly                   | 1<br>(7.14)  | 13<br>(92.86) | 3<br>(20)    | 1<br>(6.67)  | 11<br>(73.33) | 4<br>(26.67) | 11<br>(73.33) | 5<br>(33.33) | 10<br>(66.67) | 4<br>(26.67) | 1<br>(6.67)  | 10<br>(66.67) | 3<br>(21.43) | 1<br>(7.14) | 10<br>(71.43) | 15<br>(100) |   | 1<br>(8.33) | 11<br>(91.67) | 3<br>(20)    | 12<br>(80)    | 3<br>(21.43) | 11<br>(78.57) |
|      | Outpatient                | 1<br>(9.09)  | 10<br>(90.91) | 1<br>(8.33)  | 1<br>(8.33)  | 10<br>(83.33) | 2<br>(16.67) | 10<br>(83.33) | 2<br>(16.67) | 10<br>(83.33) | 1<br>(8.33)  | 1<br>(8.33)  | 10<br>(83.33) | 1<br>(9.09)  |             | 10<br>(90.91) | 12<br>(100) |   | 1<br>(9.09) | 10<br>(90.91) | 1<br>(8.33)  | 11<br>(91.67) | 1<br>(9.09)  | 10<br>(90.91) |
|      | Inpatient                 | 1<br>(7.14)  | 13<br>(92.86) | 4<br>(26.67) | 1<br>(6.67)  | 10<br>(66.67) | 4<br>(26.67) | 11<br>(73.33) | 5<br>(33.33) | 10<br>(66.67) | 5<br>(33.33) |              | 10<br>(66.67) | 4<br>(28.57) | 1<br>(7.14) | 9<br>(64.29)  | 15<br>(100) |   |             | 11<br>(100)   | 7<br>(46.67) | 8<br>(53.33)  | 2<br>(14.29) | 12<br>(85.71) |
|      | Men                       | 1<br>(9.09)  | 10<br>(90.91) | 3<br>(23.08) |              | 10<br>(76.92) | 3<br>(23.08) | 10<br>(76.92) | 3<br>(23.08) | 10<br>(76.92) | 2<br>(15.38) | 1<br>(7.69)  | 10<br>(76.92) | 2<br>(18.18) |             | 9<br>(81.82)  | 13<br>(100) |   |             | 11<br>(100)   | 3<br>(23.08) | 10<br>(76.92) | 1<br>(9.09)  | 10<br>(90.91) |
|      | Women                     | 1<br>(7.14)  | 13<br>(92.86) | 2<br>(14.29) | 2<br>(14.29) | 10<br>(71.43) | 3<br>(21.43) | 11<br>(78.57) | 4<br>(28.57) | 10<br>(71.43) | 4<br>(28.57) |              | 10<br>(71.43) | 3<br>(21.43) | 1<br>(7.14) | 10<br>(71.43) | 14<br>(100) |   | 1<br>(9.09) | 10<br>(90.91) | 5<br>(35.71) | 9<br>(64.29)  | 2<br>(14.29) | 12<br>(85.71) |

AMK= Amikacin TOB=Tobramycin GEN=Gentamicin NAL=Nalidixic acid CIP=Ciprofloxacin LEV=Levofloxacin FOF=Fosfomycin NIT=Nitrofurantoin SXT=Trimethoprim-sulfamethoxazole

CST=Colistin

Table S56: Resistances to non-beta-lactams (%) of *Citrobacter freundii* in 2020.

|       |                           | AMK                       | TOB          |              |               | GEN                        |                           | NAL          |               | CIP                       |              |               | LVX                       |               |               | FOF         | NIT         |                           | SXT                 |               |             | CST        |  |
|-------|---------------------------|---------------------------|--------------|--------------|---------------|----------------------------|---------------------------|--------------|---------------|---------------------------|--------------|---------------|---------------------------|---------------|---------------|-------------|-------------|---------------------------|---------------------|---------------|-------------|------------|--|
|       |                           | R S                       | R            | I            | S             | R                          | S                         | R            | S             | R                         | I            | S             | R                         | I             | S             | R S         | R S         | R S                       | R                   | I             | S           | R S        |  |
| 2020  | Total                     | 17<br>(100)               | 2<br>(11.76) | 1<br>(5.88)  | 14<br>(82.35) | 1<br>(5.88)                | 16<br>(94.12)             | 5<br>(29.41) | 12<br>(70.59) | 5<br>(29.41)              | 1<br>(5.88)  | 11<br>(64.71) | 3<br>(17.65)              | 2<br>(11.76)  | 12<br>(70.59) | 17<br>(100) | 17<br>(100) | 3<br>(17.65)              | 1<br>(5.88)         | 13<br>(76.47) | 17<br>(100) |            |  |
|       | Permanent catheterization | 2<br>(100)                | 2<br>(100)   |              |               | 2<br>(100)                 | 2<br>(100)                |              |               | 2<br>(100)                |              |               | 2<br>(100)                |               |               | 2<br>(100)  | 2<br>(100)  | 2<br>(100)                |                     |               | 2<br>(100)  |            |  |
|       | Clean catch midstream     | 12<br>(100)               | 2<br>(16.67) | 1<br>(8.33)  | 9<br>(75)     | 1<br>(8.33)                | 11<br>(91.67)             | 4<br>(33.33) | 8<br>(66.67)  | 5<br>(41.67)              | 7<br>(58.33) |               | 3<br>(25)                 | 2<br>(16.67)  | 7<br>(58.33)  | 12<br>(100) | 12<br>(100) | 3<br>(25)                 | 1<br>(8.33)         | 8<br>(66.67)  | 12<br>(100) |            |  |
|       | Urinary catheter          | 3<br>(100)                | 3<br>(100)   |              |               | 3<br>(100)                 | 1<br>(33.33) 2<br>(66.67) |              |               | 1<br>(33.33) 2<br>(66.67) |              |               | 3<br>(100)                |               |               | 3<br>(100)  | 3<br>(100)  | 3<br>(100)                |                     |               | 3<br>(100)  |            |  |
|       | Children                  | 1<br>(100)                | 1<br>(100)   |              |               | 1<br>(100)                 | 1<br>(100)                |              |               | 1<br>(100)                |              |               | 1<br>(100)                |               |               | 1<br>(100)  | 1<br>(100)  | 1<br>(100)                |                     |               | 1<br>(100)  |            |  |
|       | Adults                    | 3<br>(100)                | 1<br>(33.33) | 2<br>(66.67) |               | 3<br>(100)                 | 1<br>(33.33) 2<br>(66.67) |              |               | 1<br>(33.33) 2<br>(66.67) |              |               | 1<br>(33.33) 2<br>(66.67) |               |               | 3<br>(100)  | 3<br>(100)  | 1<br>(33.33) 2<br>(66.67) |                     |               | 3<br>(100)  |            |  |
|       | Elderly                   | 13<br>(100)               | 1<br>(7.69)  | 1<br>(7.69)  | 11<br>(84.62) | 1<br>(7.69)                | 12<br>(92.31)             | 4<br>(30.77) | 9<br>(69.23)  | 4<br>(30.77)              | 1<br>(7.69)  | 8<br>(61.54)  | 2<br>(15.38)              | 2<br>(15.38)  | 9<br>(69.23)  | 13<br>(100) | 13<br>(100) | 2<br>(15.38)              | 1<br>(7.69)         | 10<br>(76.92) | 13<br>(100) |            |  |
|       | Outpatient                | 4<br>(100)                | 4<br>(100)   |              |               | 4<br>(100)                 | 1<br>(25) 3<br>(75)       |              |               | 1<br>(25) 3<br>(75)       |              |               | 1<br>(25) 3<br>(75)       |               |               | 4<br>(100)  | 4<br>(100)  | 1<br>(25) 3<br>(75)       |                     |               | 4<br>(100)  |            |  |
|       | Inpatient                 | 13<br>(100)               | 2<br>(15.38) | 1<br>(7.69)  | 10<br>(76.92) | 1<br>(7.69)                | 12<br>(92.31)             | 4<br>(30.77) | 9<br>(69.23)  | 4<br>(30.77)              | 1<br>(7.69)  | 8<br>(61.54)  | 2<br>(15.38)              | 2<br>(15.38)  | 9<br>(69.23)  | 13<br>(100) | 13<br>(100) | 2<br>(15.38)              | 1<br>(7.69)         | 10<br>(76.92) | 13<br>(100) |            |  |
|       | Men                       | 4<br>(100)                | 2<br>(50)    | 2<br>(50)    |               | 1<br>(25)                  | 3<br>(75)                 | 2<br>(50)    | 2<br>(50)     | 2<br>(50)                 | 2<br>(50)    |               | 2<br>(100)                | 2<br>(100)    |               |             | 4<br>(100)  | 4<br>(100)                | 2<br>(50) 2<br>(50) |               |             | 4<br>(100) |  |
| Women | 13<br>(100)               | 1<br>(7.69) 12<br>(92.31) |              |              | 13<br>(100)   | 3<br>(23.08) 10<br>(76.92) |                           |              | 3<br>(23.08)  | 1<br>(7.69)               | 9<br>(69.23) | 1<br>(7.69)   | 2<br>(15.38)              | 10<br>(76.92) | 13<br>(100)   | 13<br>(100) | 1<br>(7.69) | 1<br>(7.69)               | 11<br>(84.62)       | 13<br>(100)   |             |            |  |

AMK= Amikacin TOB=Tobramycin GEN=Gentamicin NAL=Nalidixic acid CIP=Ciprofloxacin LEV=Levofloxacin FOF=Fosfomycin NIT=Nitrofurantoin SXT=Trimethoprim-sulfamethoxazole

CST=Colistin

Table S57: Resistances to non-beta-lactams (%) of *Citrobacter freundii* in 2021.

|       |                       | AMK          |              | TOB          |              | GEN        |           | NAL          |              | CIP          |           | LVX          |              |              | FOF          |              | NIT        |   | SXT          |              | CST          |              |
|-------|-----------------------|--------------|--------------|--------------|--------------|------------|-----------|--------------|--------------|--------------|-----------|--------------|--------------|--------------|--------------|--------------|------------|---|--------------|--------------|--------------|--------------|
|       |                       | R            | S            | R            | S            | R          | S         | R            | S            | R            | S         | R            | I            | S            | R            | S            | R          | S | R            | S            | R            | S            |
| 2021  | Total                 | 1<br>(12.5)  | 7<br>(87.5)  | 1<br>(12.5)  | 7<br>(87.5)  | 8<br>(100) |           | 5<br>(62.5)  | 3<br>(37.5)  | 4<br>(50)    | 4<br>(50) | 2<br>(25)    | 1<br>(12.5)  | 5<br>(62.5)  | 2<br>(25)    | 6<br>(75)    | 8<br>(100) |   | 1<br>(12.5)  | 7<br>(87.5)  | 1<br>(12.5)  | 7<br>(87.5)  |
|       | Clean catch midstream |              | 2<br>(100)   |              | 2<br>(100)   | 2<br>(100) |           | 1<br>(50)    | 1<br>(50)    | 1<br>(50)    | 1<br>(50) | 1<br>(50)    |              | 1<br>(50)    |              | 2<br>(100)   | 2<br>(100) |   |              | 2<br>(100)   |              | 2<br>(100)   |
|       | Urinary catheter      | 1<br>(16.67) | 5<br>(83.33) | 1<br>(16.67) | 5<br>(83.33) | 6<br>(100) |           | 4<br>(66.67) | 2<br>(33.33) | 3<br>(50)    | 3<br>(50) | 1<br>(16.67) | 1<br>(16.67) | 4<br>(66.67) | 2<br>(33.33) | 4<br>(66.67) | 6<br>(100) |   | 1<br>(16.67) | 5<br>(83.33) | 1<br>(16.67) | 5<br>(83.33) |
|       | Adults                | 1<br>(50)    | 1<br>(50)    |              | 2<br>(100)   | 2<br>(100) |           | 2<br>(100)   |              | 1<br>(50)    | 1<br>(50) | 1<br>(50)    |              | 1<br>(50)    | 1<br>(50)    | 1<br>(50)    | 2<br>(100) |   | 1<br>(50)    | 1<br>(50)    | 1<br>(50)    | 1<br>(50)    |
|       | Elderly               |              | 6<br>(100)   | 1<br>(16.67) | 5<br>(83.33) | 6<br>(100) |           | 3<br>(50)    | 3<br>(50)    | 3<br>(50)    | 3<br>(50) | 1<br>(16.67) | 1<br>(16.67) | 4<br>(66.67) | 1<br>(16.67) | 5<br>(83.33) | 6<br>(100) |   |              | 6<br>(100)   |              | 6<br>(100)   |
|       | Outpatient            | 1<br>(25)    | 3<br>(75)    | 1<br>(25)    | 3<br>(75)    | 4<br>(100) |           | 3<br>(75)    | 1<br>(25)    | 3<br>(75)    | 1<br>(25) | 1<br>(25)    | 1<br>(25)    | 2<br>(50)    | 2<br>(50)    | 2<br>(50)    | 4<br>(100) |   | 1<br>(25)    | 3<br>(75)    |              | 4<br>(100)   |
|       | Inpatient             |              | 4<br>(100)   |              | 4<br>(100)   | 4<br>(100) |           | 2<br>(50)    | 2<br>(50)    | 1<br>(25)    | 3<br>(75) | 1<br>(25)    |              | 3<br>(75)    |              | 4<br>(100)   | 4<br>(100) |   |              | 4<br>(100)   | 1<br>(25)    | 3<br>(75)    |
|       | Men                   | 1<br>(50)    | 1<br>(50)    |              | 2<br>(100)   | 2<br>(100) |           | 2<br>(100)   |              | 2<br>(100)   |           | 2<br>(100)   |              |              | 1<br>(50)    | 1<br>(50)    | 2<br>(100) |   | 1<br>(50)    | 1<br>(50)    |              | 2<br>(100)   |
| Women |                       | 6<br>(100)   | 1<br>(16.67) | 5<br>(83.33) | 6<br>(100)   |            | 3<br>(50) | 3<br>(50)    | 2<br>(33.33) | 4<br>(66.67) |           |              | 1<br>(16.67) | 5<br>(83.33) | 1<br>(16.67) | 5<br>(83.33) | 6<br>(100) |   |              | 6<br>(100)   | 1<br>(16.67) | 5<br>(83.33) |

AMK= Amikacin TOB=Tobramycin GEN=Gentamicin NAL=Nalidixic acid CIP=Ciprofloxacin LEV=Levofloxacin FOF=Fosfomycin NIT=Nitrofurantoin SXT=Trimethoprim-sulfamethoxazole  
CST=Colistin



Table S58: General annualized resistances (%) of *Providencia stuartii* during 2016-2021

|              | AMC            | AMP            | TIC             | CXM              | FOX              | CFM             | CTX              | CAZ            | FEP            | IPM              | ETP         | TZP         | AMK             | TOB            | GEN            | NAL              | CIP              | LVX              | FOF              | NIT            | SXT              | CST            |
|--------------|----------------|----------------|-----------------|------------------|------------------|-----------------|------------------|----------------|----------------|------------------|-------------|-------------|-----------------|----------------|----------------|------------------|------------------|------------------|------------------|----------------|------------------|----------------|
| <b>2016</b>  | 10/10<br>(100) | 10/10<br>(100) | -               | 4/10<br>(40)     | 0/10<br>(0)      | -               | 0/10<br>(0)      | 0/12<br>(0)    | 0/10<br>(0)    | 4/12<br>(33.33)  | -           | 0/12<br>(0) | -               | 12/12<br>(100) | 12/12<br>(100) | 8/10<br>(80)     | 6/12<br>(50)     | -                | 9/10<br>(90)     | 10/10<br>(100) | 6/12<br>(50)     | -              |
| <b>2017</b>  | 17/17<br>(100) | 17/17<br>(100) | -               | 8/17<br>(47.06)  | 3/17<br>(17.65)  | -               | 3/17<br>(17.65)  | 1/19<br>(5.26) | 1/19<br>(5.26) | 3/16<br>(18.75)  | -           | 0/19<br>(0) | -               | 19/19<br>(100) | 19/19<br>(100) | 17/17<br>(100)   | 10/19<br>(52.63) | -                | 16/17<br>(94.12) | 17/17<br>(100) | 6/19<br>(31.58)  | -              |
| <b>2018</b>  | 13/13<br>(100) | 13/13<br>(100) | -               | 9/13<br>(69.23)  | 2/13<br>(15.38)  | -               | 5/13<br>(38.46)  | 0/13<br>(0)    | 0/13<br>(0)    | 2/9<br>(22.22)   | -           | 0/13<br>(0) | -               | 13/13<br>(100) | 13/13<br>(100) | 12/13<br>(92.31) | 9/13<br>(69.23)  | -                | 13/13<br>(100)   | 13/13<br>(100) | 8/13<br>(61.54)  | -              |
| <b>2019</b>  | 8/8<br>(100)   | 8/8<br>(100)   | 2/6<br>(33.33)  | 7/8<br>(87.5)    | 6/8<br>(75)      | 3/6<br>(50)     | 2/8<br>(25)      | 0/8<br>(0)     | 1/8<br>(12.5)  | 2/8<br>(25)      | 0/6<br>(0)  | 0/8<br>(0)  | 1/6<br>(16.67)  | 8/8<br>(100)   | 8/8<br>(100)   | 7/8<br>(87.5)    | 5/8<br>(62.5)    | 4/6<br>(66.67)   | 8/8<br>(100)     | 8/8<br>(100)   | 3/8<br>(37.5)    | 6/6<br>(100)   |
| <b>2020</b>  | 6/6<br>(100)   | 6/6<br>(100)   | 0/6<br>(0)      | 6/6<br>(100)     | -                | 3/6<br>(50)     | 0/6<br>(0)       | 2/6<br>(33.33) | 0/6<br>(0)     | 0/6<br>(0)       | 0/6<br>(0)  | 0/6<br>(0)  | 0/6<br>(0)      | 6/6<br>(100)   | 6/6<br>(100)   | 5/6<br>(83.33)   | 4/6<br>(66.67)   | 4/6<br>(66.67)   | 6/6<br>(100)     | 6/6<br>(100)   | 1/6<br>(16.67)   | 6/6<br>(100)   |
| <b>2021</b>  | 5/5<br>(100)   | 5/5<br>(100)   | 1/5<br>(20)     | 5/5<br>(100)     | -                | 2/5<br>(40)     | 1/5<br>(20)      | 1/5<br>(20)    | 0/5<br>(0)     | 0/5<br>(0)       | 0/5<br>(0)  | 0/5<br>(0)  | 1/5<br>(20)     | 5/5<br>(100)   | 5/5<br>(100)   | 4/5<br>(80)      | 3/5<br>(60)      | 3/5<br>(60)      | 3/5<br>(60)      | 5/5<br>(100)   | 1/5<br>(25)      | 5/5<br>(100)   |
| <b>Total</b> | 59/59<br>(0)   | 59/59<br>(0)   | 3/17<br>(17.65) | 39/59<br>(66.10) | 11/48<br>(22.92) | 8/17<br>(47.06) | 11/59<br>(18.64) | 4/63<br>(6.35) | 2/61<br>(3.28) | 11/56<br>(19.64) | 0/17<br>(0) | 0/63<br>(0) | 2/17<br>(11.76) | 63/63<br>(100) | 63/63<br>(100) | 53/59<br>(89.83) | 37/63<br>(58.73) | 11/17<br>(65.71) | 55/59<br>(93.22) | 59/59<br>(100) | 25/63<br>(39.68) | 17/17<br>(100) |

AMC=Amoxicillin-clavulanic; AMP=Ampicillin; TIC=Ticarcillin; CXM=Cefuroxime; FOX=Cefoxitin; CFM=Cefixime; CTX=Cefotaxime; CAZ=Ceftazidime; FEP=Cefepime; IPM=Imipenem; ETP=Ertapenem; TZP=Piperacillin-tazobactam; AMK: amikacin; TOB=Tobramycin; GEN=Gentamicin; NAL=Nalidixic acid; CIP=Ciprofloxacin; LVX=Levofloxacin; FOF=Fosfomycin NIT=Nitrofurantoin; SXT=Trimethoprim-sulfamethoxazole; CST=Colistin

Table S59: Resistances to beta-lactams (%) of *Providencia stuartii* in 2016.

|      |                           | AMC |       | AMP |       | CXM |   |   | FOX |   |   | CTX |       | CAZ |       | FEP |       | IPM |   |   | TZP |       |
|------|---------------------------|-----|-------|-----|-------|-----|---|---|-----|---|---|-----|-------|-----|-------|-----|-------|-----|---|---|-----|-------|
|      |                           | R   | S     | R   | S     | R   | I | S | R   | I | S | R   | S     | R   | S     | R   | S     | R   | I | S | R   | S     |
| 2016 | Total                     | 10  | (100) | 10  | (100) | 4   | 5 | 1 | 1   | 9 |   | 10  | (100) | 12  | (100) | 12  | (100) | 4   | 3 | 5 | 12  | (100) |
|      | Permanent catheterization | 4   | (100) | 4   | (100) | 1   | 3 |   |     | 4 |   | 4   | (100) | 5   | (100) | 5   | (100) | 2   |   | 3 | 5   | (100) |
|      | Clean catch midstream     | 3   | (100) | 3   | (100) | 2   |   | 1 |     | 3 |   | 3   | (100) | 3   | (100) | 3   | (100) | 1   | 1 | 1 | 3   | (100) |
|      | Urinary catheter          | 3   | (100) | 3   | (100) | 1   | 2 |   | 1   | 2 |   | 3   | (100) | 4   | (100) | 4   | (100) | 1   | 2 | 1 | 4   | (100) |
|      | Adults                    | 5   | (100) | 5   | (100) | 1   | 3 | 1 |     | 5 |   | 5   | (100) | 6   | (100) | 6   | (100) | 1   | 1 | 4 | 6   | (100) |
|      | Elderly                   | 5   | (100) | 5   | (100) | 3   | 2 |   | 1   | 4 |   | 5   | (100) | 6   | (100) | 6   | (100) | 3   | 2 | 1 | 6   | (100) |
|      | Outpatient                | 7   | (100) | 7   | (100) | 3   | 3 | 1 | 1   | 6 |   | 7   | (100) | 7   | (100) | 7   | (100) | 2   | 2 | 3 | 7   | (100) |
|      | Inpatient                 | 3   | (100) | 3   | (100) | 1   | 2 |   |     | 3 |   | 3   | (100) | 5   | (100) | 5   | (100) | 2   | 1 | 2 | 5   | (100) |
|      | Men                       | 7   | (100) | 7   | (100) | 1   | 2 |   |     | 7 |   | 7   | (100) | 9   | (100) | 9   | (100) | 3   | 2 | 4 | 9   | (100) |
|      | Women                     | 3   | (100) | 3   | (100) | 3   | 3 | 1 | 1   | 2 |   | 3   | (100) | 3   | (100) | 3   | (100) | 1   | 1 | 1 | 3   | (100) |

AMC= Amoxicillin-clavulanic acid AMP=Ampicillin CXM=Cefuroxime FOX=Cefoxitin CTX=Cefotaxime CAZ=Ceftazidime FEP=Cefepime IPM=Imipenem TZP=Piperacillin-tazobactam.

Table S60: Resistances to beta-lactams (%) of *Providencia stuartii* in 2017.

|      |                           | AMC |       | AMP |       | CXM |   |   | FOX |   |    | CTX |   |    | CAZ |    | FEP |   |    | IPM |   |   | TZP |       |
|------|---------------------------|-----|-------|-----|-------|-----|---|---|-----|---|----|-----|---|----|-----|----|-----|---|----|-----|---|---|-----|-------|
|      |                           | R   | S     | R   | S     | R   | I | S | R   | I | S  | R   | I | S  | R   | S  | R   | I | S  | R   | I | S | R   | S     |
| 2017 | Total                     | 17  | (100) | 17  | (100) | 8   | 5 | 4 | 3   | 1 | 13 | 3   | 2 | 12 | 1   | 18 | 1   | 3 | 15 | 3   | 4 | 9 | 19  | (100) |
|      | Permanent catheterization | 5   | (100) | 5   | (100) | 1   | 3 | 1 | 1   |   | 4  | 1   |   | 4  |     | 6  |     | 1 | 5  |     | 1 | 3 | 6   | (100) |
|      | Clean catch midstream     | 6   | (100) | 6   | (100) | 3   | 1 | 2 | 2   |   | 4  | 2   |   | 4  | 1   | 5  | 1   | 1 | 4  | 2   | 1 | 3 | 6   | (100) |
|      | Urinary catheter          | 6   | (100) | 6   | (100) | 4   | 1 | 1 |     | 1 | 5  |     | 2 | 4  |     | 7  |     | 1 | 6  | 1   | 2 | 3 | 7   | (100) |
|      | Adults                    | 1   | (100) | 1   | (100) | 1   |   |   |     | 1 |    |     |   | 1  |     | 1  |     |   | 1  |     | 1 |   | 1   | (100) |
|      | Elderly                   | 16  | (100) | 16  | (100) | 7   | 5 | 4 | 3   |   | 13 | 3   | 2 | 11 | 1   | 17 | 1   | 3 | 14 | 3   | 3 | 9 | 18  | (100) |
|      | Outpatient                | 12  | (100) | 12  | (100) | 7   | 2 | 3 | 3   |   | 9  | 3   | 2 | 7  | 1   | 13 | 1   | 3 | 10 | 2   | 3 | 8 | 14  | (100) |
|      | Inpatient                 | 5   | (100) | 5   | (100) | 1   | 3 | 1 |     | 1 | 4  |     |   | 5  |     | 5  |     |   | 5  | 1   | 1 | 1 | 5   | (100) |
|      | Men                       | 6   | (100) | 6   | (100) | 3   | 1 | 2 | 2   | 1 | 3  | 2   |   | 4  |     | 7  |     | 2 | 5  |     | 2 | 5 | 7   | (100) |
|      | Women                     | 11  | (100) | 11  | (100) | 5   | 4 | 2 | 1   |   | 10 | 1   | 2 | 8  | 1   | 11 | 1   | 1 | 10 | 3   | 2 | 4 | 12  | (100) |

AMC= Amoxicillin-clavulanic acid AMP=Ampicillin CXM=Cefuroxime FOX=Cefoxitin CTX=Cefotaxime CAZ=Ceftazidime FEP=Cefepime IPM=Imipenem TZP=Piperacillin-tazobactam.

Table S61: Resistances to beta-lactams (%) of *Providencia stuartii* in 2018.

|      |                           | AMC<br>R S  |  | AMP<br>R S  |  | CXM<br>R I S |              |              | FOX<br>R I S |              |              | CTX<br>R I S |              |              | CAZ<br>R S  |  | FEP<br>R I S |               |  | IPM<br>R I S |              |              | TZP<br>R S  |  |
|------|---------------------------|-------------|--|-------------|--|--------------|--------------|--------------|--------------|--------------|--------------|--------------|--------------|--------------|-------------|--|--------------|---------------|--|--------------|--------------|--------------|-------------|--|
| 2018 | Total                     | 13<br>(100) |  | 13<br>(100) |  | 9<br>(69.23) | 3<br>(23.08) | 1<br>(7.69)  | 2<br>(15.38) | 4<br>(30.77) | 7<br>(53.85) | 5<br>(38.46) | 3<br>(23.08) | 5<br>(38.46) | 13<br>(100) |  | 1<br>(7.69)  | 12<br>(92.31) |  | 2<br>(22.22) | 4<br>(44.44) | 3<br>(33.33) | 13<br>(100) |  |
|      | Permanent catheterization | 7<br>(100)  |  | 7<br>(100)  |  | 5<br>(71.43) | 1<br>(14.29) | 1<br>(14.29) | 1<br>(14.29) | 2<br>(28.57) | 4<br>(57.14) | 3<br>(42.86) | 2<br>(28.57) | 2<br>(28.57) | 7<br>(100)  |  | 1<br>(14.29) | 6<br>(85.71)  |  |              | 4<br>(66.67) | 2<br>(33.33) | 7<br>(100)  |  |
|      | Clean catch midstream     | 5<br>(100)  |  | 5<br>(100)  |  | 3<br>(60)    | 2<br>(40)    |              | 1<br>(20)    | 1<br>(20)    | 3<br>(60)    | 2<br>(40)    |              | 3<br>(60)    | 5<br>(100)  |  |              | 5<br>(100)    |  | 1<br>(50)    |              | 1<br>(50)    | 5<br>(100)  |  |
|      | Urinary catheter          | 1<br>(100)  |  | 1<br>(100)  |  | 1<br>(100)   |              |              |              | 1<br>(100)   |              |              | 1<br>(100)   |              | 1<br>(100)  |  |              | 1<br>(100)    |  | 1<br>(100)   |              |              | 1<br>(100)  |  |
|      | Adults                    | 2<br>(100)  |  | 2<br>(100)  |  | 1<br>(50)    | 1<br>(50)    |              |              |              | 2<br>(100)   |              | 1<br>(50)    | 1<br>(50)    | 2<br>(100)  |  |              | 2<br>(100)    |  |              |              | 1<br>(100)   | 2<br>(100)  |  |
|      | Elderly                   | 11<br>(100) |  | 11<br>(100) |  | 8<br>(72.73) | 2<br>(18.18) | 1<br>(9.09)  | 2<br>(18.18) | 4<br>(36.36) | 5<br>(45.45) | 5<br>(45.45) | 2<br>(18.18) | 4<br>(36.36) | 11<br>(100) |  | 1<br>(9.09)  | 10<br>(90.91) |  | 2<br>(25)    | 4<br>(50)    | 2<br>(25)    | 11<br>(100) |  |
|      | Outpatient                | 7<br>(100)  |  | 7<br>(100)  |  | 6<br>(85.71) |              | 1<br>(14.29) | 1<br>(14.29) | 2<br>(28.57) | 4<br>(57.14) | 2<br>(28.57) | 3<br>(42.86) | 2<br>(28.57) | 7<br>(100)  |  |              | 7<br>(100)    |  | 2<br>(33.33) | 3<br>(50)    | 1<br>(16.67) | 7<br>(100)  |  |
|      | Inpatient                 | 6<br>(100)  |  | 6<br>(100)  |  | 3<br>(50)    | 3<br>(50)    |              | 1<br>(16.67) | 2<br>(33.33) | 3<br>(50)    | 3<br>(50)    |              | 3<br>(50)    | 6<br>(100)  |  | 1<br>(16.67) | 5<br>(83.33)  |  |              | 1<br>(33.33) | 2<br>(66.67) | 6<br>(100)  |  |
|      | Men                       | 3<br>(100)  |  | 3<br>(100)  |  | 3<br>(100)   |              |              |              | 1<br>(33.33) | 2<br>(66.67) | 1<br>(33.33) | 2<br>(66.67) |              | 3<br>(100)  |  |              | 3<br>(100)    |  |              | 2<br>(66.67) | 1<br>(33.33) | 3<br>(100)  |  |
|      | Women                     | 10<br>(100) |  | 10<br>(100) |  | 6<br>(60)    | 3<br>(30)    | 1<br>(10)    | 2<br>(20)    | 3<br>(30)    | 5<br>(50)    | 4<br>(40)    | 1<br>(10)    | 5<br>(50)    | 10<br>(100) |  | 1<br>(10)    | 9<br>(90)     |  | 2<br>(33.33) | 2<br>(33.33) | 2<br>(33.33) | 10<br>(100) |  |

AMC= Amoxicillin-clavulanic acid AMP=Ampicillin CXM=Cefuroxime FOX=Cefoxitin CTX=Cefotaxime CAZ=Ceftazidime FEP=Cefepime IPM=Imipenem TZP=Piperacillin-tazobactam.

Table S62: Resistances to beta-lactams (%) of *Providencia stuartii* in 2019.

|       |                           | AMC<br>R   S | AMP<br>R   S | TIC<br>R   S             | CXM<br>R   S             | FOX<br>R   S             | CFM<br>R   S         | CTX<br>R   I   S                     | CAZ<br>R   I   S         | FEP<br>R   S             | IPM<br>R   I   S                     | ETP<br>R   S | TZP<br>R   S |
|-------|---------------------------|--------------|--------------|--------------------------|--------------------------|--------------------------|----------------------|--------------------------------------|--------------------------|--------------------------|--------------------------------------|--------------|--------------|
| 2019  | Total                     | 8<br>(100)   | 8<br>(100)   | 2   4<br>(33.33) (66.67) | 7   1<br>(87.5)   (12.5) | 6   2<br>(75)   (25)     | 3   3<br>(50)   (50) | 2   2   4<br>(25)   (25)   (50)      | 2   6<br>(25)   (75)     | 1   7<br>(12.5)   (87.5) | 2   3   3<br>(25)   (37.5)   (37.5)  | 6<br>(100)   | 8<br>(100)   |
|       | Nephrostomy catheter      | 1<br>(100)   | 1<br>(100)   | 1<br>(100)               | 1<br>(100)               | 1<br>(100)               | 1<br>(100)           | 1<br>(100)                           | 1<br>(100)               | 1<br>(100)               | 1<br>(100)                           | 1<br>(100)   | 1<br>(100)   |
|       | Permanent catheterization | 4<br>(100)   | 4<br>(100)   | 2   2<br>(50)   (50)     | 4<br>(100)               | 4<br>(100)               | 2   2<br>(50)   (50) | 1   1   2<br>(25)   (25)   (50)      | 2   2<br>(50)   (50)     | 1   3<br>(25)   (75)     | 1   2   1<br>(25)   (50)   (25)      | 4<br>(100)   | 4<br>(100)   |
|       | Clean catch midstream     | 2<br>(100)   | 2<br>(100)   | 1<br>(100)               | 2<br>(100)               | 1   1<br>(50)   (50)     | 1<br>(100)           | 1   1<br>(50)   (50)                 | 2<br>(100)               | 2<br>(100)               | 1   1<br>(50)   (50)                 | 1<br>(100)   | 2<br>(100)   |
|       | Urinary catheter          | 1<br>(100)   | 1<br>(100)   |                          | 1<br>(100)               | 1<br>(100)               |                      | 1<br>(100)                           | 1<br>(100)               | 1<br>(100)               | 1<br>(100)                           |              | 1<br>(100)   |
|       | Adults                    | 4<br>(100)   | 4<br>(100)   | 2   1<br>(66.67) (33.33) | 3   1<br>(75)   (25)     | 3   1<br>(75)   (25)     | 3<br>(100)           | 1   2   1<br>(25)   (50)   (25)      | 2   2<br>(50)   (50)     | 1   3<br>(25)   (75)     | 1   2   1<br>(25)   (50)   (25)      | 3<br>(100)   | 4<br>(100)   |
|       | Elderly                   | 4<br>(100)   | 4<br>(100)   | 3<br>(100)               | 4<br>(100)               | 3   1<br>(75)   (25)     | 3<br>(100)           | 1   3<br>(25)   (75)                 | 4<br>(100)               | 4<br>(100)               | 1   1   2<br>(25)   (25)   (50)      | 3<br>(100)   | 4<br>(100)   |
|       | Outpatient                | 6<br>(100)   | 6<br>(100)   | 2   3<br>(40)   (60)     | 6<br>(100)               | 5   1<br>(83.33) (16.67) | 2   3<br>(40)   (60) | 2   1   3<br>(33.33) (16.67) (50)    | 2   4<br>(33.33) (66.67) | 1   5<br>(16.67) (83.33) | 2   2   2<br>(33.33) (33.33) (33.33) | 5<br>(100)   | 6<br>(100)   |
|       | Inpatient                 | 2<br>(100)   | 2<br>(100)   | 1<br>(100)               | 1   1<br>(50)   (50)     | 1   1<br>(50)   (50)     | 1<br>(100)           | 1   1<br>(50)   (50)                 | 2<br>(100)               | 2<br>(100)               | 1   1<br>(50)   (50)                 | 1<br>(100)   | 2<br>(100)   |
|       | Men                       | 7<br>(100)   | 7<br>(100)   | 2   3<br>(40)   (60)     | 6   1<br>(85.71) (14.29) | 5   2<br>(71.43) (28.57) | 3   2<br>(60)   (40) | 2   2   3<br>(28.57) (28.57) (42.86) | 2   5<br>(28.57) (71.43) | 1   6<br>(14.29) (85.71) | 2   3   2<br>(28.57) (42.86) (28.57) | 5<br>(100)   | 7<br>(100)   |
| Women | 1<br>(100)                | 1<br>(100)   | 1<br>(100)   | 1<br>(100)               | 1<br>(100)               | 1<br>(100)               | 1<br>(100)           | 1<br>(100)                           | 1<br>(100)               | 1<br>(100)               | 1<br>(100)                           | 1<br>(100)   |              |

AMC= Amoxicillin-clavulanic acid AMP=Ampicillin CXM=Cefuroxime FOX=Cefoxitin CTX=Cefotaxime CAZ=Ceftazidime FEP=Cefepime IPM=Imipenem ETP=Ertapenem TZP=Piperacillin-tazobactam.

Table S63: Resistances to beta-lactams (%) of *Providencia stuartii* in 2020.

|      |                       | AMC        |   | AMP        |   | TIC        |   | CXM        |   | CFM          |              | CTX          |              | CAZ          |              | FEP        |   | IPM          |              |            | ETP |            | TZP |   |
|------|-----------------------|------------|---|------------|---|------------|---|------------|---|--------------|--------------|--------------|--------------|--------------|--------------|------------|---|--------------|--------------|------------|-----|------------|-----|---|
|      |                       | R          | S | R          | S | R          | S | R          | S | R            | S            | R            | I            | S            | R            | S          | R | S            | R            | I          | S   | R          | S   | R |
| 2020 | Total                 | 6<br>(100) |   | 6<br>(100) |   | 6<br>(100) |   | 6<br>(100) |   | 3<br>(50)    | 3<br>(50)    | 3<br>(50)    | 3<br>(50)    | 2<br>(33.33) | 4<br>(66.67) | 6<br>(100) |   | 1<br>(16.67) | 5<br>(83.33) | 6<br>(100) |     | 6<br>(100) |     |   |
|      | Clean catch midstream | 3<br>(100) |   | 3<br>(100) |   | 3<br>(100) |   | 3<br>(100) |   | 1<br>(33.33) | 2<br>(66.67) | 1<br>(33.33) | 2<br>(66.67) | 1<br>(33.33) | 2<br>(66.67) | 3<br>(100) |   |              | 3<br>(100)   | 3<br>(100) |     | 3<br>(100) |     |   |
|      | Urinary catheter      | 3<br>(100) |   | 3<br>(100) |   | 3<br>(100) |   | 3<br>(100) |   | 2<br>(66.67) | 1<br>(33.33) | 2<br>(66.67) | 1<br>(33.33) | 1<br>(33.33) | 2<br>(66.67) | 3<br>(100) |   | 1<br>(33.33) | 2<br>(66.67) | 3<br>(100) |     | 3<br>(100) |     |   |
|      | Adults                | 2<br>(100) |   | 2<br>(100) |   | 2<br>(100) |   | 2<br>(100) |   | 1<br>(50)    | 1<br>(50)    |              | 2<br>(100)   |              | 2<br>(100)   | 2<br>(100) |   |              | 2<br>(100)   | 2<br>(100) |     | 2<br>(100) |     |   |
|      | Elderly               | 4<br>(100) |   | 4<br>(100) |   | 4<br>(100) |   | 4<br>(100) |   | 2<br>(50)    | 2<br>(50)    | 3<br>(75)    | 1<br>(25)    | 2<br>(50)    | 2<br>(50)    | 4<br>(100) |   | 1<br>(25)    | 3<br>(75)    | 4<br>(100) |     | 4<br>(100) |     |   |
|      | Outpatient            | 3<br>(100) |   | 3<br>(100) |   | 3<br>(100) |   | 3<br>(100) |   | 1<br>(33.33) | 2<br>(66.67) | 2<br>(66.67) | 1<br>(33.33) | 1<br>(33.33) | 2<br>(66.67) | 3<br>(100) |   | 1<br>(33.33) | 2<br>(66.67) | 3<br>(100) |     | 3<br>(100) |     |   |
|      | Inpatient             | 3<br>(100) |   | 3<br>(100) |   | 3<br>(100) |   | 3<br>(100) |   | 2<br>(66.67) | 1<br>(33.33) | 1<br>(33.33) | 2<br>(66.67) | 1<br>(33.33) | 2<br>(66.67) | 3<br>(100) |   |              | 3<br>(100)   | 3<br>(100) |     | 3<br>(100) |     |   |
|      | Men                   | 1<br>(100) |   | 1<br>(100) |   | 1<br>(100) |   | 1<br>(100) |   | 1<br>(100)   |              | 1<br>(100)   |              |              | 1<br>(100)   | 1<br>(100) |   |              | 1<br>(100)   | 1<br>(100) |     | 1<br>(100) |     |   |
|      | Women                 | 5<br>(100) |   | 5<br>(100) |   | 5<br>(100) |   | 5<br>(100) |   | 2<br>(40)    | 3<br>(60)    | 2<br>(40)    | 3<br>(60)    | 2<br>(40)    | 3<br>(60)    | 5<br>(100) |   | 1<br>(20)    | 4<br>(80)    | 5<br>(100) |     | 5<br>(100) |     |   |

AMC= Amoxicillin-clavulanic acid AMP=Ampicillin CXM=Cefuroxime FOX=Cefoxitin CTX=Cefotaxime CAZ=Ceftazidime FEP=Cefepime IPM=Imipenem ETP=Ertapenem TZP=Piperacillin-tazobactam.

Table S64: Resistances to beta-lactams (%) of *Providencia stuartii* in 2021.

|      |                       | AMC        |   | AMP        |   | TIC        |           | CXM        |   | CFM          |              | CTX          |           |              | CAZ          |              | FEP        |   | IPM        |   |            | ETP |            | TZP |   |
|------|-----------------------|------------|---|------------|---|------------|-----------|------------|---|--------------|--------------|--------------|-----------|--------------|--------------|--------------|------------|---|------------|---|------------|-----|------------|-----|---|
|      |                       | R          | S | R          | S | R          | S         | R          | S | R            | S            | R            | I         | S            | R            | S            | R          | S | R          | I | S          | R   | S          | R   | S |
| 2021 | Total                 | 5<br>(100) |   | 5<br>(100) |   | 1<br>(20)  | 4<br>(80) | 5<br>(100) |   | 2<br>(40)    | 3<br>(60)    | 1<br>(20)    | 1<br>(20) | 3<br>(60)    | 1<br>(20)    | 4<br>(80)    | 5<br>(100) |   | 5<br>(100) |   | 5<br>(100) |     | 5<br>(100) |     |   |
|      | Clean catch midstream | 3<br>(100) |   | 3<br>(100) |   | 3<br>(100) |           | 3<br>(100) |   | 1<br>(33.33) | 2<br>(66.67) | 1<br>(33.33) |           | 2<br>(66.67) | 1<br>(33.33) | 2<br>(66.67) | 3<br>(100) |   | 3<br>(100) |   | 3<br>(100) |     | 3<br>(100) |     |   |
|      | Urinary catheter      | 2<br>(100) |   | 2<br>(100) |   | 1<br>(50)  | 1<br>(50) | 2<br>(100) |   | 1<br>(50)    | 1<br>(50)    |              | 1<br>(50) | 1<br>(50)    |              | 2<br>(100)   | 2<br>(100) |   | 2<br>(100) |   | 2<br>(100) |     | 2<br>(100) |     |   |
|      | Adults                | 1<br>(100) |   | 1<br>(100) |   | 1<br>(100) |           | 1<br>(100) |   |              | 1<br>(100)   |              |           | 1<br>(100)   |              | 1<br>(100)   | 1<br>(100) |   | 1<br>(100) |   | 1<br>(100) |     | 1<br>(100) |     |   |
|      | Elderly               | 4<br>(100) |   | 4<br>(100) |   | 1<br>(25)  | 3<br>(75) | 4<br>(100) |   | 2<br>(50)    | 2<br>(50)    | 1<br>(25)    | 1<br>(25) | 2<br>(50)    | 1<br>(25)    | 3<br>(75)    | 4<br>(100) |   | 4<br>(100) |   | 4<br>(100) |     | 4<br>(100) |     |   |
|      | Outpatient            | 1<br>(100) |   | 1<br>(100) |   | 1<br>(100) |           | 1<br>(100) |   | 1<br>(100)   |              | 1<br>(100)   |           |              | 1<br>(100)   |              | 1<br>(100) |   | 1<br>(100) |   | 1<br>(100) |     | 1<br>(100) |     |   |
|      | Inpatient             | 4<br>(100) |   | 4<br>(100) |   | 1<br>(25)  | 3<br>(75) | 4<br>(100) |   | 1<br>(25)    | 3<br>(75)    |              | 1<br>(25) | 3<br>(75)    |              | 4<br>(100)   | 4<br>(100) |   | 4<br>(100) |   | 4<br>(100) |     | 4<br>(100) |     |   |
|      | Men                   | 1<br>(100) |   | 1<br>(100) |   | 1<br>(100) |           | 1<br>(100) |   |              | 1<br>(100)   |              |           | 1<br>(100)   |              | 1<br>(100)   | 1<br>(100) |   | 1<br>(100) |   | 1<br>(100) |     | 1<br>(100) |     |   |
|      | Women                 | 4<br>(100) |   | 4<br>(100) |   | 1<br>(25)  | 3<br>(75) | 4<br>(100) |   | 2<br>(50)    | 2<br>(50)    | 1<br>(25)    | 1<br>(25) | 2<br>(50)    | 1<br>(25)    | 3<br>(75)    | 4<br>(100) |   | 4<br>(100) |   | 4<br>(100) |     | 4<br>(100) |     |   |

AMC= Amoxicillin-clavulanic acid AMP=Ampicillin CXM=Cefuroxime FOX=Cefoxitin CTX=Cefotaxime CAZ=Ceftazidime FEP=Cefepime IPM=Imipenem ETP=Ertapenem TZP=Piperacillin-tazobactam.

Table S65: Resistances to non-beta-lactams (%) of *Providencia stuartii* in 2016.

|      |                           | TOB         |   | GEN         |   | NAL          |              | CIP          |              |              | FOF          |              | NIT         |   | SXT          |              |
|------|---------------------------|-------------|---|-------------|---|--------------|--------------|--------------|--------------|--------------|--------------|--------------|-------------|---|--------------|--------------|
|      |                           | R           | S | R           | S | R            | S            | R            | I            | S            | R            | S            | R           | S | R            | S            |
| 2016 | Total                     | 12<br>(100) |   | 12<br>(100) |   | 8<br>(80)    | 2<br>(20)    | 6<br>(50)    | 1<br>(8.33)  | 5<br>(41.67) | 9<br>(90)    | 1<br>(10)    | 10<br>(100) |   | 6<br>(50)    | 6<br>(50)    |
|      | Permanent catheterization | 5<br>(100)  |   | 5<br>(100)  |   | 3<br>(75)    | 1<br>(25)    | 3<br>(60)    | 1<br>(20)    | 1<br>(20)    | 3<br>(75)    | 1<br>(25)    | 4<br>(100)  |   | 2<br>(40)    | 3<br>(60)    |
|      | Clean catch midstream     | 3<br>(100)  |   | 3<br>(100)  |   | 2<br>(66.67) | 1<br>(33.33) | 1<br>(33.33) |              | 2<br>(66.67) | 3<br>(100)   |              | 3<br>(100)  |   | 1<br>(33.33) | 2<br>(66.67) |
|      | Urinary catheter          | 4<br>(100)  |   | 4<br>(100)  |   | 3<br>(100)   |              | 2<br>(50)    |              | 2<br>(50)    | 3<br>(100)   |              | 3<br>(100)  |   | 3<br>(75)    | 1<br>(25)    |
|      | Adults                    | 6<br>(100)  |   | 6<br>(100)  |   | 4<br>(80)    | 1<br>(20)    | 4<br>(66.67) |              | 2<br>(33.33) | 5<br>(100)   |              | 5<br>(100)  |   | 4<br>(66.67) | 2<br>(33.33) |
|      | Elderly                   | 6<br>(100)  |   | 6<br>(100)  |   | 4<br>(80)    | 1<br>(20)    | 2<br>(33.33) | 1<br>(16.67) | 3<br>(50)    | 4<br>(80)    | 1<br>(20)    | 5<br>(100)  |   | 2<br>(33.33) | 4<br>(66.67) |
|      | Outpatient                | 7<br>(100)  |   | 7<br>(100)  |   | 6<br>(85.71) | 1<br>(14.29) | 3<br>(42.86) |              | 4<br>(57.14) | 7<br>(100)   |              | 7<br>(100)  |   | 3<br>(42.86) | 4<br>(57.24) |
|      | Inpatient                 | 5<br>(100)  |   | 5<br>(100)  |   | 2<br>(66.67) | 1<br>(33.33) | 3<br>(60)    | 1<br>(20)    | 1<br>(20)    | 2<br>(66.67) | 1<br>(33.33) | 3<br>(100)  |   | 3<br>(60)    | 2<br>(40)    |
|      | Men                       | 9<br>(100)  |   | 9<br>(100)  |   | 5<br>(71.43) | 2<br>(28.57) | 5<br>(55.56) | 1<br>(11.11) | 3<br>(33.33) | 6<br>(85.71) | 1<br>(14.29) | 7<br>(100)  |   | 5<br>(55.56) | 4<br>(44.44) |
|      | Women                     | 3<br>(100)  |   | 3<br>(100)  |   | 3<br>(100)   |              | 1<br>(33.33) |              | 2<br>(66.67) | 3<br>(100)   |              | 3<br>(100)  |   | 1<br>(33.33) | 2<br>(66.67) |

TOB=Tobramycin GEN=Gentamicin NAL=Nalidixic acid CIP=Ciprofloxacin FOF=Fosfomicin NIT=Nitrofurantoin SXT=Trimethoprim-sulfamethoxazole



Table S66: Resistances to non-beta-lactams (%) of *Providencia stuartii* in 2017.

|      |                           | TOB |       | GEN |       | NAL |       | CIP     |         |         | FOF     |         | NIT   |       | SXT     |         |
|------|---------------------------|-----|-------|-----|-------|-----|-------|---------|---------|---------|---------|---------|-------|-------|---------|---------|
|      |                           | R   | S     | R   | S     | R   | S     | R       | I       | S       | R       | S       | R     | S     | R       | S       |
| 2017 | Total                     | 19  | (100) | 19  | (100) | 17  | (100) | 10      | 8       | 1       | 16      | 1       | 17    | (100) | 6       | 13      |
|      |                           |     |       |     |       |     |       | (52.63) | (42.11) | (5.26)  | (94.12) | (5.88)  |       |       | (31.58) | (68.42) |
|      | Permanent catheterization | 6   | (100) | 6   | (100) | 5   | (100) | 2       | 4       |         | 5       |         | 5     | (100) | 1       | 5       |
|      |                           |     |       |     |       |     |       | (33.33) | (66.67) |         | (100)   |         | (100) |       | (16.67) | (83.33) |
|      | Clean catch midstream     | 6   | (100) | 6   | (100) | 6   | (100) | 3       | 2       | 1       | 5       | 1       | 6     | (100) | 2       | 4       |
|      |                           |     |       |     |       |     |       | (50)    | (33.33) | (16.67) | (83.33) | (16.67) | (100) |       | (33.33) | (66.67) |
|      | Urinary catheter          | 7   | (100) | 7   | (100) | 6   | (100) | 5       | 2       |         | 6       |         | 6     | (100) | 3       | 4       |
|      |                           |     |       |     |       |     |       | (71.43) | (28.57) |         | (100)   |         | (100) |       | (42.86) | (57.14) |
|      | Adults                    | 1   | (100) | 1   | (100) | 1   | (100) | 1       |         |         | 1       |         | 1     | (100) | 1       |         |
|      |                           |     |       |     |       |     |       | (100)   |         |         | (100)   |         | (100) |       | (100)   |         |
|      | Elderly                   | 18  | (100) | 18  | (100) | 16  | (100) | 9       | 8       | 1       | 15      | 1       | 16    | (100) | 5       | 13      |
|      |                           |     |       |     |       |     |       | (50)    | (44.44) | (5.56)  | (93.75) | (6.25)  | (100) |       | (27.78) | (72.22) |
|      | Outpatient                | 14  | (100) | 14  | (100) | 12  | (100) | 1       | 4       |         | 11      | 1       | 12    | (100) | 4       | 10      |
|      |                           |     |       |     |       |     |       | (20)    | (80)    |         | (91.67) | (8.33)  | (100) |       | (28.57) | (71.43) |
|      | Inpatient                 | 5   | (100) | 5   | (100) | 5   | (100) | 9       | 4       | 1       | 5       |         | 5     | (100) | 2       | 3       |
|      |                           |     |       |     |       |     |       | (64.29) | (28.57) | (7.14)  | (100)   |         | (100) |       | (40)    | (60)    |
|      | Men                       | 7   | (100) | 7   | (100) | 6   | (100) | 5       | 2       |         | 5       | 1       | 6     | (100) | 3       | 4       |
|      |                           |     |       |     |       |     |       | (71.43) | (28.57) |         | (83.33) | (16.67) | (100) |       | (42.86) | (57.14) |
|      | Women                     | 12  | (100) | 12  | (100) | 11  | (100) | 5       | 6       | 1       | 11      |         | 11    | (100) | 3       | 9       |
|      |                           |     |       |     |       |     |       | (41.67) | (50)    | (8.33)  | (100)   |         | (100) |       | (25)    | (75)    |

TOB=Tobramycin GEN=Gentamicin NAL=Nalidixic acid CIP=Ciprofloxacin FOF=Fosfomicin NIT=Nitrofurantoin SXT=Trimethoprim-sulfamethoxazole

Table S67: Resistances to non-beta-lactams (%) of *Providencia stuartii* in 2018.

|      |                           | TOB |       | GEN |       | NAL |                      | CIP |                      |                      | FOF |       | NIT |       | SXT |                      |
|------|---------------------------|-----|-------|-----|-------|-----|----------------------|-----|----------------------|----------------------|-----|-------|-----|-------|-----|----------------------|
|      |                           | R   | S     | R   | S     | R   | S                    | R   | I                    | S                    | R   | S     | R   | S     | R   | S                    |
| 2018 | Total                     | 13  | (100) | 13  | (100) | 12  | 1<br>(92.31) (7.69)  | 9   | 1<br>(69.23) (7.69)  | 3<br>(23.08)         | 13  | (100) | 13  | (100) | 8   | 5<br>(61.54) (38.46) |
|      | Permanent catheterization | 7   | (100) | 7   | (100) | 7   | (100)                | 6   | 1<br>(85.71) (14.29) |                      | 7   | (100) | 7   | (100) | 5   | 2<br>(71.43) (28.57) |
|      | Clean catch midstream     | 5   | (100) | 5   | (100) | 4   | 1<br>(80) (20)       | 2   |                      | 3<br>(40) (60)       | 5   | (100) | 5   | (100) | 3   | 2<br>(60) (40)       |
|      | Urinary catheter          | 1   | (100) | 1   | (100) | 1   | (100)                | 1   | (100)                |                      | 1   | (100) | 1   | (100) |     | 1<br>(100)           |
|      | Adults                    | 2   | (100) | 2   | (100) | 1   | 1<br>(50) (50)       | 1   |                      | 1<br>(50) (50)       | 2   | (100) | 2   | (100) |     | 2<br>(100)           |
|      | Elderly                   | 11  | (100) | 11  | (100) | 11  | (100)                | 8   | 1<br>(72.73) (9.09)  | 2<br>(18.18)         | 11  | (100) | 11  | (100) | 8   | 3<br>(72.73) (27.27) |
|      | Outpatient                | 7   | (100) | 7   | (100) | 7   | (100)                | 5   |                      | 2<br>(71.43) (28.57) | 7   | (100) | 7   | (100) | 3   | 4<br>(42.86) (57.14) |
|      | Inpatient                 | 6   | (100) | 6   | (100) | 5   | 1<br>(83.33) (16.67) | 4   | 1<br>(66.67) (16.67) | 1<br>(16.67)         | 6   | (100) | 6   | (100) | 5   | 1<br>(83.33) (16.67) |
|      | Men                       | 3   | (100) | 3   | (100) | 3   | (100)                | 3   | (100)                |                      | 3   | (100) | 3   | (100) | 1   | 2<br>(33.33) (66.67) |
|      | Women                     | 10  | (100) | 10  | (100) | 9   | 1<br>(90) (10)       | 6   | 1<br>(60) (10)       | 3<br>(30)            | 10  | (100) | 10  | (100) | 7   | 3<br>(70) (30)       |

TOB=Tobramycin GEN=Gentamicin NAL=Nalidixic acid CIP=Ciprofloxacin FOF=Fosfomicin NIT=Nitrofurantoin SXT=Trimethoprim-sulfamethoxazole

Table S68: Resistances to non-beta-lactams (%) of *Providencia stuartii* in 2019.

|      |                           | AMK          |              |              | TOB        |   | GEN        |   | NAL          |              | CIP          |              |              | LVX          |              | FOF        |   | NIT        |   | SXT          |              |              | CST        |   |
|------|---------------------------|--------------|--------------|--------------|------------|---|------------|---|--------------|--------------|--------------|--------------|--------------|--------------|--------------|------------|---|------------|---|--------------|--------------|--------------|------------|---|
|      |                           | R            | I            | S            | R          | S | R          | S | R            | S            | R            | I            | S            | R            | S            | R          | S | R          | S | R            | I            | S            | R          | S |
| 2019 | Total                     | 1<br>(16.67) | 1<br>(16.67) | 4<br>(66.67) | 8<br>(100) |   | 8<br>(100) |   | 7<br>(87.5)  | 1<br>(12.5)  | 5<br>(62.5)  | 1<br>(12.5)  | 2<br>(25)    | 4<br>(66.67) | 2<br>(33.33) | 8<br>(100) |   | 8<br>(100) |   | 3<br>(37.5)  | 2<br>(25)    | 3<br>(37.5)  | 6<br>(100) |   |
|      | Nephrostomy catheter      |              |              | 1<br>(100)   | 1<br>(100) |   | 1<br>(100) |   | 1<br>(100)   |              | 1<br>(100)   |              |              | 1<br>(100)   |              | 1<br>(100) |   | 1<br>(100) |   | 1<br>(100)   |              |              | 1<br>(100) |   |
|      | Permanent catheterization | 1<br>(25)    | 1<br>(25)    | 2<br>(50)    | 4<br>(100) |   | 4<br>(100) |   | 3<br>(75)    | 1<br>(25)    | 3<br>(75)    |              | 1<br>(25)    | 3<br>(75)    | 1<br>(25)    | 4<br>(100) |   | 4<br>(100) |   | 1<br>(25)    | 2<br>(50)    | 1<br>(25)    | 4<br>(100) |   |
|      | Clean catch midstream     |              |              | 1<br>(100)   | 2<br>(100) |   | 2<br>(100) |   | 2<br>(100)   |              |              | 1<br>(50)    | 1<br>(50)    |              | 1<br>(100)   | 2<br>(100) |   | 2<br>(100) |   | 1<br>(50)    |              | 1<br>(50)    | 1<br>(100) |   |
|      | Urinary catheter          |              |              |              | 1<br>(100) |   | 1<br>(100) |   | 1<br>(100)   |              | 1<br>(100)   |              |              |              |              | 1<br>(100) |   | 1<br>(100) |   |              |              | 1<br>(100)   |            |   |
|      | Adults                    | 1<br>(33.34) | 1<br>(33.33) | 1<br>(33.33) | 4<br>(100) |   | 4<br>(100) |   | 4<br>(100)   |              | 4<br>(100)   |              |              | 3<br>(100)   |              | 4<br>(100) |   | 4<br>(100) |   | 2<br>(50)    | 1<br>(25)    | 1<br>(25)    | 3<br>(100) |   |
|      | Elderly                   |              |              | 3<br>(100)   | 4<br>(100) |   | 4<br>(100) |   | 3<br>(75)    | 1<br>(25)    | 1<br>(25)    | 1<br>(25)    | 2<br>(50)    | 1<br>(33.33) | 2<br>(66.67) | 4<br>(100) |   | 4<br>(100) |   | 1<br>(25)    | 1<br>(25)    | 2<br>(50)    | 3<br>(100) |   |
|      | Outpatient                | 1<br>(20)    | 1<br>(20)    | 3<br>(60)    | 6<br>(100) |   | 6<br>(100) |   | 5<br>(83.33) | 1<br>(16.67) | 3<br>(50)    | 1<br>(16.67) | 2<br>(33.33) | 3<br>(60)    | 2<br>(40)    | 6<br>(100) |   | 6<br>(100) |   | 2<br>(33.33) | 2<br>(33.33) | 2<br>(33.33) | 5<br>(100) |   |
|      | Inpatient                 |              |              | 1<br>(100)   | 2<br>(100) |   | 2<br>(100) |   | 2<br>(100)   |              | 2<br>(100)   |              |              | 1<br>(100)   |              | 2<br>(100) |   | 2<br>(100) |   | 1<br>(50)    |              | 1<br>(50)    | 1<br>(100) |   |
|      | Men                       | 1<br>(20)    | 1<br>(20)    | 3<br>(60)    | 7<br>(100) |   | 7<br>(100) |   | 6<br>(85.71) | 1<br>(14.29) | 5<br>(71.43) | 1<br>(14.29) | 1<br>(14.29) | 4<br>(80)    | 1<br>(20)    | 7<br>(100) |   | 7<br>(100) |   | 3<br>(42.86) | 2<br>(28.57) | 2<br>(28.57) | 5<br>(100) |   |
|      | Women                     |              |              | 1<br>(100)   | 1<br>(100) |   | 1<br>(100) |   | 1<br>(100)   |              |              |              | 1<br>(100)   |              | 1<br>(100)   | 1<br>(100) |   | 1<br>(100) |   |              |              | 1<br>(100)   | 1<br>(100) |   |

AMK= Amikacin TOB=Tobramycin GEN=Gentamicin NAL=Nalidixic acid CIP=Ciprofloxacin LEV=Levofloxacin FOF=Fosfomycin NIT=Nitrofurantoin SXT=Trimethoprim-sulfamethoxazole  
CST=Colistin

Table S69: Resistances to non-beta-lactams (%) of *Providencia stuartii* in 2020.

|      |                       | AMK        | TOB        | GEN        | NAL          | CIP          | LVX          | FOF          | NIT          | SXT          | CST          |            |            |              |              |            |
|------|-----------------------|------------|------------|------------|--------------|--------------|--------------|--------------|--------------|--------------|--------------|------------|------------|--------------|--------------|------------|
|      |                       | R          | S          | R          | S            | R            | S            | R            | S            | R            | S            | R          | S          |              |              |            |
| 2020 | Total                 | 6<br>(100) | 6<br>(100) | 6<br>(100) | 5<br>(83.33) | 1<br>(16.67) | 4<br>(66.67) | 2<br>(33.33) | 4<br>(66.67) | 1<br>(16.67) | 1<br>(16.67) | 6<br>(100) | 6<br>(100) | 1<br>(16.67) | 5<br>(83.33) | 6<br>(100) |
|      | Clean catch midstream | 3<br>(100) | 3<br>(100) | 3<br>(100) | 2<br>(66.67) | 1<br>(33.33) | 2<br>(66.67) | 1<br>(33.33) | 2<br>(66.67) |              | 1<br>(33.33) | 3<br>(100) | 3<br>(100) |              | 3<br>(100)   | 3<br>(100) |
|      | Urinary catheter      | 3<br>(100) | 3<br>(100) | 3<br>(100) | 3<br>(100)   |              | 2<br>(66.67) | 1<br>(33.33) | 2<br>(66.67) | 1<br>(33.33) |              | 3<br>(100) | 3<br>(100) | 1<br>(33.33) | 2<br>(66.67) | 3<br>(100) |
|      | Adults                | 2<br>(100) | 2<br>(100) | 2<br>(100) | 2<br>(100)   |              | 2<br>(100)   |              | 2<br>(100)   |              |              | 2<br>(100) | 2<br>(100) | 1<br>(50)    | 1<br>(50)    | 2<br>(100) |
|      | Elderly               | 4<br>(100) | 4<br>(100) | 4<br>(100) | 3<br>(75)    | 1<br>(25)    | 2<br>(50)    | 2<br>(50)    | 2<br>(50)    | 1<br>(25)    | 1<br>(25)    | 4<br>(100) | 4<br>(100) |              | 4<br>(100)   | 4<br>(100) |
|      | Outpatient            | 3<br>(100) | 3<br>(100) | 3<br>(100) | 3<br>(100)   |              | 2<br>(66.67) | 1<br>(33.33) | 2<br>(66.67) | 1<br>(33.33) |              | 3<br>(100) | 3<br>(100) |              | 3<br>(100)   | 3<br>(100) |
|      | Inpatient             | 3<br>(100) | 3<br>(100) | 3<br>(100) | 2<br>(66.67) | 1<br>(33.33) | 2<br>(66.67) | 1<br>(33.33) | 2<br>(66.67) |              | 1<br>(33.33) | 3<br>(100) | 3<br>(100) | 1<br>(33.33) | 2<br>(66.67) | 3<br>(100) |
|      | Men                   | 1<br>(100) | 1<br>(100) | 1<br>(100) | 1<br>(100)   |              | 1<br>(100)   |              | 1<br>(100)   |              |              | 1<br>(100) | 1<br>(100) |              | 1<br>(100)   | 1<br>(100) |
|      | Women                 | 5<br>(100) | 5<br>(100) | 5<br>(100) | 4<br>(80)    | 1<br>(20)    | 3<br>(60)    | 2<br>(40)    | 3<br>(60)    | 1<br>(20)    | 1<br>(20)    | 5<br>(100) | 5<br>(100) |              | 5<br>(100)   | 5<br>(100) |

AMK= Amikacin TOB=Tobramycin GEN=Gentamicin NAL=Nalidixic acid CIP=Ciprofloxacin LEV=Levofloxacin FOF=Fosfomycin NIT=Nitrofurantoin SXT=Trimethoprim-sulfamethoxazole  
CST=Colistin

Table S70: Resistances to non-beta-lactams (%) of *Providencia stuartii* in 2021.

|      |                       | AMK          |              | TOB        |   | GEN        |   | NAL          |              | CIP          |              | LVX          |              | FOF          |              | NIT        |   | SXT          |           |              | CST        |   |
|------|-----------------------|--------------|--------------|------------|---|------------|---|--------------|--------------|--------------|--------------|--------------|--------------|--------------|--------------|------------|---|--------------|-----------|--------------|------------|---|
|      |                       | R            | S            | R          | S | R          | S | R            | S            | R            | S            | R            | S            | R            | S            | R          | S | R            | I         | S            | R          | S |
| 2021 | Total                 | 1<br>(20)    | 4<br>(80)    | 5<br>(100) |   | 5<br>(100) |   | 4<br>(80)    | 1<br>(20)    | 3<br>(60)    | 2<br>(40)    | 3<br>(60)    | 2<br>(40)    | 3<br>(60)    | 2<br>(40)    | 5<br>(100) |   | 1<br>(25)    | 1<br>(25) | 3<br>(60)    | 5<br>(100) |   |
|      | Clean catch midstream | 1<br>(33.33) | 2<br>(66.67) | 3<br>(100) |   | 3<br>(100) |   | 2<br>(66.67) | 1<br>(33.33) | 2<br>(66.67) | 1<br>(33.33) | 2<br>(66.67) | 1<br>(33.33) | 2<br>(66.67) | 1<br>(33.33) | 3<br>(100) |   | 1<br>(33.33) |           | 2<br>(66.67) | 3<br>(100) |   |
|      | Urinary catheter      |              | 2<br>(100)   | 2<br>(100) |   | 2<br>(100) |   | 2<br>(100)   |              | 1<br>(50)    | 1<br>(50)    | 1<br>(50)    | 1<br>(50)    | 1<br>(50)    | 1<br>(50)    | 2<br>(100) |   |              | 1<br>(50) | 1<br>(50)    | 2<br>(100) |   |
|      | Adults                |              | 1<br>(100)   | 1<br>(100) |   | 1<br>(100) |   |              | 1<br>(100)   |              | 1<br>(100)   |              | 1<br>(100)   |              | 1<br>(100)   | 1<br>(100) |   |              |           | 1<br>(100)   | 1<br>(100) |   |
|      | Elderly               | 1<br>(25)    | 3<br>(75)    | 4<br>(100) |   | 4<br>(100) |   | 4<br>(100)   |              | 3<br>(75)    | 1<br>(25)    | 3<br>(75)    | 1<br>(25)    | 3<br>(75)    | 1<br>(25)    | 4<br>(100) |   | 1<br>(25)    | 1<br>(25) | 2<br>(50)    | 4<br>(100) |   |
|      | Outpatient            | 1<br>(100)   |              | 1<br>(100) |   | 1<br>(100) |   | 1<br>(100)   |              | 1<br>(100)   |              | 1<br>(100)   |              | 1<br>(100)   |              | 1<br>(100) |   |              |           | 1<br>(100)   | 1<br>(100) |   |
|      | Inpatient             |              | 4<br>(100)   | 4<br>(100) |   | 4<br>(100) |   | 3<br>(75)    | 1<br>(25)    | 2<br>(50)    | 2<br>(50)    | 2<br>(50)    | 2<br>(50)    | 2<br>(50)    | 2<br>(50)    | 4<br>(100) |   | 1<br>(25)    | 1<br>(25) | 2<br>(50)    | 4<br>(100) |   |
|      | Men                   |              | 1<br>(100)   | 1<br>(100) |   | 1<br>(100) |   | 1<br>(100)   |              |              | 1<br>(100)   |              | 1<br>(100)   |              | 1<br>(100)   | 1<br>(100) |   |              |           | 1<br>(100)   | 1<br>(100) |   |
|      | Women                 | 1<br>(25)    | 3<br>(75)    | 4<br>(100) |   | 4<br>(100) |   | 3<br>(75)    | 1<br>(25)    | 3<br>(75)    | 1<br>(25)    | 3<br>(75)    | 1<br>(25)    | 3<br>(75)    | 1<br>(25)    | 4<br>(100) |   | 1<br>(25)    | 1<br>(25) | 2<br>(50)    | 4<br>(100) |   |

AMK= Amikacin TOB=Tobramycin GEN=Gentamicin NAL=Nalidixic acid CIP=Ciprofloxacin LEV=Levofloxacin FOF=Fosfomycin NIT=Nitrofurantoin SXT=Trimethoprim-sulfamethoxazole  
CST=Colistin

Table S71: Systematic review of the resistance rates (%) of *Serratia marcescens* in urine cultures.

| Author (year of publication)    | Period    | Place   | N          | CAZ          | FEP          | CRO         | C-T         | IPM         | I-R        | MEM        | ETP        | DOR        | TZP          | AMK         | TOB         | ATM         | FOF         | CIP          | LVX        | CST          |
|---------------------------------|-----------|---------|------------|--------------|--------------|-------------|-------------|-------------|------------|------------|------------|------------|--------------|-------------|-------------|-------------|-------------|--------------|------------|--------------|
| H. Seifert (2018) <sup>17</sup> | 2014-2015 | Germany | 49         | 4.1          | 4.1          | 12.2        | 10.2        |             |            | 4.1        | 4.1        | 4.1        | 20.4         | 0           | 12.2        |             | 22.4        | 8.2          | 6.1        | 100          |
| S. Lob (2020)                   | 2015-2017 | Europe  | 103        | 23.3         | 22.3         |             |             | 14.6        | 7.8        |            |            |            | 21.4         | 9.7         |             | 25.2        |             | 25.9         |            | 97.1         |
| <b>Weighted averages</b>        |           |         | <b>152</b> | <b>17.11</b> | <b>16.43</b> | <b>12.2</b> | <b>10.2</b> | <b>14.6</b> | <b>7.8</b> | <b>4.1</b> | <b>4.1</b> | <b>4.1</b> | <b>21.08</b> | <b>6.57</b> | <b>12.2</b> | <b>25.2</b> | <b>22.4</b> | <b>20.19</b> | <b>6.1</b> | <b>98.03</b> |

CAZ=Ceftazidime FEP=Cefepime CRO=Ceftriaxone C-T=Ceftolozane-tazobactam IPM=Imipenem I-R=Imipenem-relebactam MEM=Meropenem ETP=Ertapenem DOR=Doripenem  
TZP=Piperacillin-tazobactam AMK=Amikacin TOB=Tobramycin ATM=Aztreonam FOF=Fosfomycin CIP=Ciprofloxacin LVX=Levofloxacin CST=Colistin

Table S72: General annualized resistances (%) of *Serratia marcescens* during 2016-2021

|              | AMC            | AMP            | CXM              | FOX              | CTX              | CAZ             | FEP            | IPM         | TZP            | TOB            | GEN            | NAL             | CIP             | FOF             | NIT              | SXT             |
|--------------|----------------|----------------|------------------|------------------|------------------|-----------------|----------------|-------------|----------------|----------------|----------------|-----------------|-----------------|-----------------|------------------|-----------------|
| <b>2016</b>  | 12/12<br>(100) | 12/12<br>(100) | 12/12<br>(100)   | 7/12<br>(58.33)  | 6/11<br>(54.55)  | 3/12<br>(25)    | 1/12<br>(8.33) | 0/12<br>(0) | 1/12<br>(8.33) | 12/12<br>(100) | 1/12<br>(8.33) | 4/12<br>(33.33) | 0/12<br>(0)     | 4/12<br>(33.33) | 11/12<br>(91.67) | 2/12<br>(16.67) |
| <b>2017</b>  | 8/8<br>(100)   | 8/8<br>(100)   | 8/8<br>(100)     | 2/8<br>(25)      | 1/7<br>(14.29)   | 0/8<br>(0)      | 0/8<br>(0)     | 0/8<br>(0)  | 0/8<br>(0)     | 8/8<br>(100)   | 0/8<br>(0)     | 0/8<br>(0)      | 0/8<br>(0)      | 0/8<br>(0)      | 8/8<br>(100)     | 0/8<br>(0)      |
| <b>2018</b>  | 6/6<br>(100)   | 6/6<br>(100)   | 5/6<br>(83.33)   | 1/5<br>(20)      | 0/5<br>(0)       | 0/5<br>(0)      | 0/5<br>(0)     | 0/4<br>(0)  | 0/5<br>(0)     | 6/6<br>(100)   | 0/6<br>(0)     | 0/5<br>(0)      | 0/6<br>(0)      | 0/6<br>(0)      | 5/6<br>(83.33)   | 0/6<br>(0)      |
| <b>2019</b>  | 19/19<br>(100) | 19/19<br>(100) | 19/19<br>(100)   | 17/19<br>(89.47) | 8/19<br>(42.11)  | 5/19<br>(26.32) | 1/19<br>(5.26) | 0/10<br>(0) | 1/19<br>(5.26) | 19/19<br>(100) | 0/19<br>(0)    | 2/19<br>(10.53) | 2/19<br>(10.53) | 1/19<br>(5.26)  | 19/19<br>(100)   | 1/19<br>(5.26)  |
| <b>2020</b>  | 8/8<br>(100)   | 8/8<br>(100)   | 8/8<br>(100)     | 8/8<br>(100)     | 1/8<br>(12.5)    | 1/8<br>(12.5)   | 0/8<br>(0)     | 0/8<br>(0)  | 0/8<br>(0)     | 8/8<br>(100)   | 0/8<br>(0)     | 0/8<br>(0)      | 0/8<br>(0)      | 1/7<br>(12.5)   | 8<br>(100)       | 0/8<br>(0)      |
| <b>2021</b>  | 2/2<br>(100)   | 2/2<br>(100)   | 2/2<br>(100)     | 2/2<br>(100)     | 0/2<br>(0)       | 0/2<br>(0)      | 0/2<br>(0)     | 0/2<br>(0)  | 0/2<br>(0)     | 2/2<br>(100)   | 0/2<br>(0)     | 0/2<br>(0)      | 0/2<br>(0)      | 0/2<br>(0)      | 2/2<br>(100)     | 0/2<br>(0)      |
| <b>Total</b> | 55/55<br>(100) | 55/55<br>(100) | 54/55<br>(98.18) | 37/54<br>(68.52) | 16/52<br>(30.77) | 9/54<br>(16.67) | 2/54<br>(3.70) | 0/44<br>(0) | 2/54<br>(3.70) | 55/55<br>(100) | 1/55<br>(1.8)  | 6/54<br>(11.11) | 2/55<br>(3.64)  | 6/54<br>(11.11) | 53/55<br>(96.36) | 3/55<br>(5.45)  |

AMC=Amoxicillin-clavulanic; AMP=Ampicillin; TIC=Ticarcillin; CXM=Cefuroxime; FOX=Cefoxitin; CTX=Cefotaxime; CAZ=Ceftazidime; FEP=Cefepime; IPM=Imipenem; TZP=Piperacillin-tazobactam; TOB=Tobramycin; GEN=Gentamicin; NAL=Nalidixic acid; CIP=Ciprofloxacin; FOF=Fosfomycin NIT=Nitrofurantoin; SXT=Trimethoprim-sulfamethoxazole.

Table S73: Resistances to beta-lactams (%) of *Serratia marcescens* in 2016.

|      |                           | AMC |       | AMP |       | CXM |       | FOX     |         |         | CTX     |         |         | CAZ     |         | FEP     |         |         | IPM     |         |   | TZP     |         |         |
|------|---------------------------|-----|-------|-----|-------|-----|-------|---------|---------|---------|---------|---------|---------|---------|---------|---------|---------|---------|---------|---------|---|---------|---------|---------|
|      |                           | R   | S     | R   | S     | R   | S     | R       | I       | S       | R       | I       | S       | R       | S       | R       | I       | S       | R       | I       | S | R       | I       | S       |
| 2016 | Total                     | 12  | (100) | 12  | (100) | 12  | (100) | 7       | 4       | 1       | 6       | 1       | 4       | 3       | 9       | 1       | 2       | 9       | 1       | 11      |   | 1       | 1       | 10      |
|      |                           |     |       |     |       |     |       | (58.33) | (33.33) | (8.33)  | (54.55) | (9.09)  | (36.36) | (25)    | (75)    | (8.33)  | (16.67) | (75)    | (8.33)  | (91.67) |   | (8.33)  | (8.33)  | (83.33) |
|      | Nephrostomy catheter      | 1   | (100) | 1   | (100) | 1   | (100) | 1       |         |         | 1       |         |         | 1       |         |         | 1       |         |         | 1       |   | 1       |         |         |
|      |                           |     |       |     |       |     |       | (100)   |         |         | (100)   |         |         | (100)   |         |         | (100)   |         |         | (100)   |   | (100)   |         |         |
|      | Permanent catheterization | 1   | (100) | 1   | (100) | 1   | (100) | 1       |         |         |         | 1       |         | 1       |         | 1       |         |         |         | 1       |   |         | 1       |         |
|      |                           |     |       |     |       |     |       | (100)   |         |         | (100)   |         |         | (100)   |         | (100)   |         |         | (100)   |         |   |         | (100)   |         |
|      | Clean catch midstream     | 9   | (100) | 9   | (100) | 9   | (100) | 5       | 3       | 1       | 4       |         | 4       |         | 9       |         | 1       | 8       | 1       | 8       |   | 1       | 8       |         |
|      |                           |     |       |     |       |     |       | (55.56) | (33.33) | (11.11) | (50)    |         | (50)    |         | (100)   |         | (11.11) | (88.89) | (11.11) | (88.89) |   | (11.11) | (88.89) |         |
|      | Urinary catheter          | 1   | (100) | 1   | (100) | 1   | (100) |         | 1       |         | 1       |         |         | 1       |         |         | 1       |         |         | 1       |   |         | 1       |         |
|      |                           |     |       |     |       |     |       | (100)   |         |         | (100)   |         |         | (100)   |         | (100)   |         |         | (100)   |         |   |         | (100)   |         |
|      | Children                  | 2   | (100) | 2   | (100) | 2   | (100) | 1       | 1       |         |         |         | 2       |         | 2       |         |         | 2       |         | 2       |   |         | 2       |         |
|      |                           |     |       |     |       |     |       | (50)    | (50)    |         |         |         | (100)   |         | (100)   |         |         | (100)   |         | (100)   |   |         | (100)   |         |
|      | Adults                    | 2   | (100) | 2   | (100) | 2   | (100) | 1       | 1       |         | 1       |         |         | 1       | 1       |         |         | 2       |         | 2       |   |         | 2       |         |
|      |                           |     |       |     |       |     |       | (50)    | (50)    |         | (100)   |         |         | (50)    | (50)    |         |         | (100)   |         | (100)   |   |         | (100)   |         |
|      | Elderly                   | 8   | (100) | 8   | (100) | 8   | (100) | 5       | 2       | 1       | 5       | 1       | 2       | 2       | 6       | 1       | 2       | 5       | 1       | 7       |   | 1       | 1       | 6       |
|      |                           |     |       |     |       |     |       | (62.5)  | (25)    | (12.5)  | (62.5)  | (12.5)  | (25)    | (25)    | (75)    | (12.5)  | (25)    | (62.5)  | (12.5)  | (87.5)  |   | (12.5)  | (12.5)  | (75)    |
|      | Outpatient                | 7   | (100) | 7   | (100) | 7   | (100) | 5       | 1       | 1       | 3       | 1       | 3       | 2       | 5       | 1       | 2       | 4       | 1       | 6       |   | 1       | 1       | 5       |
|      |                           |     |       |     |       |     |       | (71.43) | (14.29) | (14.29) | (42.86) | (14.29) | (42.86) | (28.57) | (71.43) | (14.29) | (28.57) | (57.14) | (14.29) | (85.71) |   | (14.29) | (14.29) | (71.43) |
|      | Inpatient                 | 5   | (100) | 5   | (100) | 5   | (100) | 2       | 3       |         | 3       |         | 1       | 1       | 4       |         |         | 5       |         | 5       |   |         | 5       |         |
|      |                           |     |       |     |       |     |       | (40)    | (60)    |         | (75)    |         | (25)    | (20)    | (80)    |         |         | (100)   |         | (100)   |   |         | (100)   |         |
|      | Men                       | 12  | (100) | 12  | (100) | 12  | (100) | 7       | 4       | 1       | 6       | 1       | 4       | 3       | 9       | 1       | 2       | 9       | 1       | 11      |   | 1       | 1       | 10      |
|      |                           |     |       |     |       |     |       | (58.33) | (33.33) | (8.33)  | (54.55) | (9.09)  | (36.36) | (25)    | (75)    | (8.33)  | (16.67) | (75)    | (8.33)  | (91.67) |   | (8.33)  | (8.33)  | (83.33) |
|      | Women                     |     |       |     |       |     |       |         |         |         |         |         |         |         |         |         |         |         |         |         |   |         |         |         |

AMC= Amoxicillin-clavulanic AMP=Ampicillin CXM=Cefuroxime FOX=Cefoxitin CTX=Cefotaxime CAZ=Ceftazidime FEP=Cefepime IPM=Imipenem TZP=Piperacillin-tazobactam.



Table S74: Resistances to beta-lactams (%) of *Serratia marcescens* in 2017.

|      |                       | AMC        |   | AMP        |   | CXM        |   | FOX          |              |              | CTX          |              |              | CAZ        |   | FEP        |   | IPM        |   | TZP        |   |
|------|-----------------------|------------|---|------------|---|------------|---|--------------|--------------|--------------|--------------|--------------|--------------|------------|---|------------|---|------------|---|------------|---|
|      |                       | R          | S | R          | S | R          | S | R            | I            | S            | R            | I            | S            | R          | S | R          | S | R          | S | R          | S |
| 2017 | Total                 | 8<br>(100) |   | 8<br>(100) |   | 8<br>(100) |   | 2<br>(25)    | 2<br>(25)    | 4<br>(50)    | 1<br>(14.29) | 1<br>(14.29) | 5<br>(71.43) | 8<br>(100) |   | 8<br>(100) |   | 8<br>(100) |   | 8<br>(100) |   |
|      | Clean catch midstream | 7<br>(100) |   | 7<br>(100) |   | 7<br>(100) |   | 2<br>(28.57) | 2<br>(28.57) | 3<br>(42.86) | 1<br>(16.67) | 1<br>(16.67) | 4<br>(66.67) | 7<br>(100) |   | 7<br>(100) |   | 7<br>(100) |   | 7<br>(100) |   |
|      | Urinary catheter      | 1<br>(100) |   | 1<br>(100) |   | 1<br>(100) |   |              |              | 1<br>(100)   |              |              | 1<br>(100)   | 1<br>(100) |   | 1<br>(100) |   | 1<br>(100) |   | 1<br>(100) |   |
|      | Children              | 1<br>(100) |   | 1<br>(100) |   | 1<br>(100) |   | 1<br>(100)   |              |              |              | 1<br>(100)   |              | 1<br>(100) |   | 1<br>(100) |   | 1<br>(100) |   | 1<br>(100) |   |
|      | Adults                | 1<br>(100) |   | 1<br>(100) |   | 1<br>(100) |   |              |              | 1<br>(100)   |              |              | 1<br>(100)   | 1<br>(100) |   | 1<br>(100) |   | 1<br>(100) |   | 1<br>(100) |   |
|      | Elderly               | 6<br>(100) |   | 6<br>(100) |   | 6<br>(100) |   | 1<br>(16.67) | 2<br>(33.33) | 3<br>(50)    | 1<br>(20)    |              | 4<br>(80)    | 6<br>(100) |   | 6<br>(100) |   | 6<br>(100) |   | 6<br>(100) |   |
|      | Outpatient            | 4<br>(100) |   | 4<br>(100) |   | 4<br>(100) |   |              | 2<br>(50)    | 2<br>(50)    |              |              | 3<br>(100)   | 4<br>(100) |   | 4<br>(100) |   | 4<br>(100) |   | 4<br>(100) |   |
|      | Inpatient             | 4<br>(100) |   | 4<br>(100) |   | 4<br>(100) |   | 2<br>(50)    |              | 2<br>(50)    | 1<br>(25)    | 1<br>(25)    | 2<br>(50)    | 4<br>(100) |   | 4<br>(100) |   | 4<br>(100) |   | 4<br>(100) |   |
|      | Men                   | 4<br>(100) |   | 4<br>(100) |   | 4<br>(100) |   | 1<br>(25)    | 1<br>(25)    | 2<br>(50)    | 1<br>(25)    |              | 3<br>(75)    | 4<br>(100) |   | 4<br>(100) |   | 4<br>(100) |   | 4<br>(100) |   |
|      | Women                 | 4<br>(100) |   | 4<br>(100) |   | 4<br>(100) |   | 1<br>(25)    | 1<br>(25)    | 2<br>(50)    |              | 1<br>(33.33) | 2<br>(66.67) | 4<br>(100) |   | 4<br>(100) |   | 4<br>(100) |   | 4<br>(100) |   |

AMC= Amoxicillin-clavulanic acid AMP=Ampicillin CXM=Cefuroxime FOX=Cefoxitin CTX=Cefotaxime CAZ=Ceftazidime FEP=Cefepime IPM=Imipenem TZP=Piperacillin-tazobactam.

Table S75: Resistances to beta-lactams (%) of *Serratia marcescens* in 2018.

|      |                           | AMC        |   | AMP        |   | CXM          |              | FOX       |            |   | CTX        |   | CAZ        |   | FEP        |   | IPM        |   | TZP        |   |
|------|---------------------------|------------|---|------------|---|--------------|--------------|-----------|------------|---|------------|---|------------|---|------------|---|------------|---|------------|---|
|      |                           | R          | S | R          | S | R            | S            | R         | I          | S | R          | S | R          | S | R          | S | R          | S | R          | S |
| 2018 | Total                     | 6<br>(100) |   | 6<br>(100) |   | 5<br>(83.33) | 1<br>(16.67) | 1<br>(20) | 4<br>(80)  |   | 5<br>(100) |   | 5<br>(100) |   | 5<br>(100) |   | 4<br>(100) |   | 5<br>(100) |   |
|      | Permanent catheterization | 1<br>(100) |   | 1<br>(100) |   | 1<br>(100)   |              |           | 1<br>(100) |   | 1<br>(100) |   | 1<br>(100) |   | 1<br>(100) |   | 1<br>(100) |   | 1<br>(100) |   |
|      | Clean catch midstream     | 3<br>(100) |   | 3<br>(100) |   | 2<br>(66.67) | 1<br>(33.33) | 1<br>(50) | 1<br>(50)  |   | 2<br>(100) |   |
|      | Urinary catheter          | 2<br>(100) |   | 2<br>(100) |   | 1<br>(100)   |              |           | 2<br>(100) |   | 2<br>(100) |   | 2<br>(100) |   | 2<br>(100) |   | 1<br>(100) |   | 2<br>(100) |   |
|      | Adults                    | 2<br>(100) |   | 2<br>(100) |   | 1<br>(50)    | 1<br>(50)    |           | 1<br>(100) |   | 2<br>(100) |   | 2<br>(100) |   | 2<br>(100) |   | 1<br>(100) |   | 2<br>(100) |   |
|      | Elderly                   | 4<br>(100) |   | 4<br>(100) |   | 4<br>(100)   |              | 1<br>(25) | 3<br>(75)  |   | 3<br>(100) |   |
|      | Outpatient                | 2<br>(100) |   | 2<br>(100) |   | 1<br>(50)    | 1<br>(50)    |           | 1<br>(100) |   | 2<br>(100) |   | 2<br>(100) |   | 2<br>(100) |   |            |   | 2<br>(100) |   |
|      | Inpatient                 | 4<br>(100) |   | 4<br>(100) |   | 4<br>(100)   |              | 1<br>(25) | 3<br>(75)  |   | 3<br>(100) |   | 3<br>(100) |   | 3<br>(100) |   | 4<br>(100) |   | 3<br>(100) |   |
|      | Men                       | 4<br>(100) |   | 4<br>(100) |   | 3<br>(75)    | 1<br>(25)    | 1<br>(25) | 3<br>(75)  |   | 3<br>(100) |   |
|      | Women                     | 2<br>(100) |   | 2<br>(100) |   | 2<br>(100)   |              |           | 1<br>(100) |   | 2<br>(100) |   | 2<br>(100) |   | 2<br>(100) |   | 1<br>(100) |   | 2<br>(100) |   |

ç AMC= Amoxicillin-clavulanic acid AMP=Ampicillin CXM=Cefuroxime FOX=Cefoxitin CTX=Cefotaxime CAZ=Ceftazidime FEP=Cefepime IPM=Imipenem TZP=Piperacillin-tazobactam.

Table S76: Resistances to beta-lactams (%) of *Serratia marcescens* in 2019.

|      |                           | AMC         |   | AMP         |   | CXM         |   | FOX           |              | CTX          |              |               | CAZ          |             |               | FEP         |               | IPM |             | TZP          |             |               |
|------|---------------------------|-------------|---|-------------|---|-------------|---|---------------|--------------|--------------|--------------|---------------|--------------|-------------|---------------|-------------|---------------|-----|-------------|--------------|-------------|---------------|
|      |                           | R           | S | R           | S | R           | S | R             | S            | R            | I            | S             | R            | I           | S             | R           | S             | R   | S           | R            | I           | S             |
| 2019 | Total                     | 19<br>(100) |   | 19<br>(100) |   | 19<br>(100) |   | 17<br>(89.47) | 2<br>(10.53) | 8<br>(42.11) | 1<br>(5.26)  | 10<br>(52.63) | 5<br>(26.32) | 1<br>(5.26) | 13<br>(68.42) | 1<br>(5.26) | 18<br>(94.74) |     | 10<br>(100) | 1<br>(5.26)  | 1<br>(5.26) | 17<br>(89.47) |
|      | Permanent catheterization | 4<br>(100)  |   | 4<br>(100)  |   | 4<br>(100)  |   | 3<br>(75)     | 1<br>(25)    | 3<br>(75)    |              | 1<br>(25)     | 2<br>(50)    |             | 2<br>(50)     | 1<br>(25)   | 3<br>(75)     |     | 4<br>(100)  |              |             | 4<br>(100)    |
|      | Clean catch midstream     | 10<br>(100) |   | 10<br>(100) |   | 10<br>(100) |   | 10<br>(100)   |              | 2<br>(20)    | 1<br>(10)    | 7<br>(70)     |              |             | 10<br>(100)   |             | 10<br>(100)   |     | 10<br>(100) |              | 1<br>(10)   | 9<br>(90)     |
|      | Urinary catheter          | 5<br>(100)  |   | 5<br>(100)  |   | 5<br>(100)  |   | 4<br>(80)     | 1<br>(20)    | 3<br>(60)    |              | 2<br>(40)     | 3<br>(60)    | 1<br>(20)   | 1<br>(20)     |             | 5<br>(100)    |     | 5<br>(100)  | 1<br>(20)    |             | 4<br>(80)     |
|      | Children                  | 3<br>(100)  |   | 3<br>(100)  |   | 3<br>(100)  |   | 3<br>(100)    |              | 1<br>(33.33) |              | 2<br>(66.67)  | 1<br>(33.33) |             | 2<br>(66.67)  |             | 3<br>(100)    |     | 3<br>(100)  |              |             | 3<br>(100)    |
|      | Adults                    | 11<br>(100) |   | 11<br>(100) |   | 11<br>(100) |   | 10<br>(90.91) | 1<br>(9.09)  | 3<br>(27.27) | 1<br>(9.09)  | 7<br>(63.64)  |              | 1<br>(9.09) | 10<br>(90.91) | 1<br>(9.09) | 10<br>(90.91) |     | 11<br>(100) |              | 1<br>(9.09) | 10<br>(90.91) |
|      | Elderly                   | 5<br>(100)  |   | 5<br>(100)  |   | 5<br>(100)  |   | 4<br>(80)     | 1<br>(20)    | 4<br>(80)    |              | 1<br>(20)     | 4<br>(80)    |             | 1<br>(20)     |             | 5<br>(100)    |     | 5<br>(100)  | 1<br>(20)    |             | 4<br>(80)     |
|      | Outpatient                | 8<br>(100)  |   | 8<br>(100)  |   | 8<br>(100)  |   | 7<br>(87.5)   | 1<br>(12.5)  | 3<br>(37.5)  | 1<br>(12.5)  | 4<br>(50)     | 2<br>(25)    | 1<br>(12.5) | 5<br>(62.5)   |             | 8<br>(100)    |     | 8<br>(100)  | 1<br>(12.5)  | 1<br>(12.5) | 6<br>(75)     |
|      | Inpatient                 | 11<br>(100) |   | 11<br>(100) |   | 11<br>(100) |   | 10<br>(90.91) | 1<br>(9.09)  | 5<br>(45.45) |              | 6<br>(54.55)  | 3<br>(27.27) |             | 8<br>(72.73)  | 1<br>(9.09) | 10<br>(90.91) |     | 11<br>(100) |              |             | 11<br>(100)   |
|      | Men                       | 10<br>(100) |   | 10<br>(100) |   | 10<br>(100) |   | 9<br>(90)     | 1<br>(10)    | 4<br>(40)    |              | 6<br>(60)     | 2<br>(20)    | 1<br>(10)   | 7<br>(70)     | 1<br>(10)   | 9<br>(90)     |     | 10<br>(100) |              | 1<br>(10)   | 9<br>(90)     |
|      | Women                     | 9<br>(100)  |   | 9<br>(100)  |   | 9<br>(100)  |   | 8<br>(88.89)  | 1<br>(11.11) | 4<br>(44.44) | 1<br>(11.11) | 4<br>(44.44)  | 3<br>(33.33) |             | 6<br>(66.67)  |             | 9<br>(100)    |     | 9<br>(100)  | 1<br>(11.11) |             | 8<br>(88.89)  |

AMC= Amoxicillin-clavulanic acid AMP=Ampicillin CXM=Cefuroxime FOX=Cefoxitin CTX=Cefotaxime CAZ=Ceftazidime FEP=Cefepime IPM=Imipenem TZP=Piperacillin-tazobactam.

Table S77: Resistances to beta-lactams (%) of *Serratia marcescens* in 2020.

|      |                           | AMC |       | AMP |       | CXM |       | FOX |       | CTX |         | CAZ |         | FEP |         | IPM |         | TZP |       |
|------|---------------------------|-----|-------|-----|-------|-----|-------|-----|-------|-----|---------|-----|---------|-----|---------|-----|---------|-----|-------|
|      |                           | R   | S     | R   | S     | R   | S     | R   | S     | R   | S       | R   | S       | R   | S       | R   | S       | R   | S     |
| 2020 | Total                     | 8   | (100) | 8   | (100) | 8   | (100) | 8   | (100) | 1   | (12.5)  | 7   | (87.5)  | 1   | (12.5)  | 7   | (87.5)  | 8   | (100) |
|      | Nephrostomy catheter      | 1   | (100) | 1   | (100) | 1   | (100) | 1   | (100) |     |         | 1   | (100)   | 1   | (100)   | 1   | (100)   | 1   | (100) |
|      | Permanent catheterization | 2   | (100) | 2   | (100) | 2   | (100) | 2   | (100) |     |         | 2   | (100)   | 2   | (100)   | 2   | (100)   | 2   | (100) |
|      | Clean catch midstream     | 3   | (100) | 3   | (100) | 3   | (100) | 3   | (100) |     |         | 3   | (100)   | 3   | (100)   | 3   | (100)   | 3   | (100) |
|      | Urinary catheter          | 2   | (100) | 2   | (100) | 2   | (100) | 2   | (100) | 1   | (50)    | 1   | (50)    | 1   | (50)    | 1   | (50)    | 2   | (100) |
|      | Adults                    | 4   | (100) | 4   | (100) | 4   | (100) | 4   | (100) |     |         | 4   | (100)   | 4   | (100)   | 4   | (100)   | 4   | (100) |
|      | Elderly                   | 4   | (100) | 4   | (100) | 4   | (100) | 4   | (100) | 1   | (25)    | 3   | (75)    | 1   | (25)    | 3   | (75)    | 4   | (100) |
|      | Outpatient                | 3   | (100) | 3   | (100) | 3   | (100) | 3   | (100) |     |         | 3   | (100)   | 3   | (100)   | 3   | (100)   | 3   | (100) |
|      | Inpatient                 | 5   | (100) | 5   | (100) | 5   | (100) | 5   | (100) | 1   | (20)    | 4   | (80)    | 1   | (20)    | 4   | (80)    | 5   | (100) |
|      | Men                       | 7   | (100) | 7   | (100) | 7   | (100) | 7   | (100) | 1   | (14.29) | 6   | (85.71) | 1   | (14.29) | 6   | (85.71) | 7   | (100) |
|      | Women                     | 1   | (100) | 1   | (100) | 1   | (100) | 1   | (100) |     |         | 1   | (100)   | 1   | (100)   | 1   | (100)   | 1   | (100) |

AMC= Amoxicillin-clavulanic acid AMP=Ampicillin CXM=Cefuroxime FOX=Cefoxitin CTX=Cefotaxime CAZ=Ceftazidime FEP=Cefepime IPM=Imipenem TZP=Piperacillin-tazobactam.

Table S78: Resistances to beta-lactams (%) of *Serratia marcescens* in 2021.

|      |                           | AMC |       | AMP |       | CXM |       | FOX |       | CTX |       | CAZ |       | FEP |       | IPM |       | TZP |       |
|------|---------------------------|-----|-------|-----|-------|-----|-------|-----|-------|-----|-------|-----|-------|-----|-------|-----|-------|-----|-------|
|      |                           | R   | S     | R   | S     | R   | S     | R   | S     | R   | S     | R   | S     | R   | S     | R   | S     | R   | S     |
| 2021 | Total                     | 2   | (100) | 2   | (100) | 2   | (100) | 2   | (100) | 2   | (100) | 2   | (100) | 2   | (100) | 2   | (100) | 2   | (100) |
|      | Permanent catheterization | 1   | (100) | 1   | (100) | 1   | (100) | 1   | (100) | 1   | (100) | 1   | (100) | 1   | (100) | 1   | (100) | 1   | (100) |
|      | Clean catch midstream     | 1   | (100) | 1   | (100) | 1   | (100) | 1   | (100) | 1   | (100) | 1   | (100) | 1   | (100) | 1   | (100) | 1   | (100) |
|      | Elderly                   | 2   | (100) | 2   | (100) | 2   | (100) | 2   | (100) | 2   | (100) | 2   | (100) | 2   | (100) | 2   | (100) | 2   | (100) |
|      | Outpatient                | 1   | (100) | 1   | (100) | 1   | (100) | 1   | (100) | 1   | (100) | 1   | (100) | 1   | (100) | 1   | (100) | 1   | (100) |
|      | Inpatient                 | 1   | (100) | 1   | (100) | 1   | (100) | 1   | (100) | 1   | (100) | 1   | (100) | 1   | (100) | 1   | (100) | 1   | (100) |
|      | Men                       | 2   | (100) | 2   | (100) | 2   | (100) | 2   | (100) | 2   | (100) | 2   | (100) | 2   | (100) | 2   | (100) | 2   | (100) |

AMC= Amoxicillin-clavulanic acid AMP=Ampicillin CXM=Cefuroxime FOX=Cefoxitin CTX=Cefotaxime CAZ=Ceftazidime FEP=Cefepime IPM=Imipenem TZP=Piperacillin-tazobactam.

Table S79: Resistances to non-beta-lactams (%) of *Serratia marcescens* in 2016.

|      |                           | TOB         |   | GEN          |              |               | NAL          |              | CIP         |   | FOF          |              | NIT           |              |   | SXT          |               |
|------|---------------------------|-------------|---|--------------|--------------|---------------|--------------|--------------|-------------|---|--------------|--------------|---------------|--------------|---|--------------|---------------|
|      |                           | R           | S | R            | I            | S             | R            | S            | R           | S | R            | S            | R             | I            | S | R            | S             |
| 2016 | Total                     | 12<br>(100) |   | 1<br>(8.33)  | 1<br>(8.33)  | 10<br>(83.33) | 4<br>(33.33) | 8<br>(66.67) | 12<br>(100) |   | 4<br>(33.33) | 8<br>(66.67) | 11<br>(91.67) | 1<br>(8.33)  |   | 2<br>(16.67) | 10<br>(83.33) |
|      | Nephrostomy catheter      | 1<br>(100)  |   |              |              | 1<br>(100)    |              | 1<br>(100)   | 1<br>(100)  |   |              | 1<br>(100)   | 1<br>(100)    |              |   |              | 1<br>(100)    |
|      | Permanent catheterization | 1<br>(100)  |   |              | 1<br>(100)   |               | 1<br>(100)   |              | 1<br>(100)  |   | 1<br>(100)   |              | 1<br>(100)    |              |   |              | 1<br>(100)    |
|      | Clean catch midstream     | 9<br>(100)  |   | 1<br>(11.11) |              | 8<br>(88.89)  | 3<br>(33.33) | 6<br>(66.67) | 9<br>(100)  |   | 2<br>(22.22) | 7<br>(77.78) | 8<br>(88.89)  | 1<br>(11.11) |   | 2<br>(22.22) | 7<br>(77.78)  |
|      | Urinary catheter          | 1<br>(100)  |   |              |              | 1<br>(100)    |              | 1<br>(100)   | 1<br>(100)  |   | 1<br>(100)   |              | 1<br>(100)    |              |   |              | 1<br>(100)    |
|      | Children                  | 2<br>(100)  |   |              |              | 2<br>(100)    |              | 2<br>(100)   | 2<br>(100)  |   |              | 2<br>(100)   | 2<br>(100)    |              |   |              | 2<br>(100)    |
|      | Adults                    | 2<br>(100)  |   |              |              | 2<br>(100)    | 1<br>(50)    | 1<br>(50)    | 2<br>(100)  |   | 1<br>(50)    | 1<br>(50)    | 2<br>(100)    |              |   |              | 2<br>(100)    |
|      | Elderly                   | 8<br>(100)  |   | 1<br>(12.5)  | 1<br>(12.5)  | 6<br>(75)     | 3<br>(37.5)  | 5<br>(62.5)  | 8<br>(100)  |   | 3<br>(37.5)  | 5<br>(62.5)  | 7<br>(87.5)   | 1<br>(12.5)  |   | 2<br>(25)    | 6<br>(75)     |
|      | Outpatient                | 7<br>(100)  |   | 1<br>(14.29) | 1<br>(14.29) | 5<br>(71.43)  | 2<br>(28.57) | 5<br>(71.43) | 7<br>(100)  |   | 3<br>(42.86) | 4<br>(57.14) | 7<br>(100)    |              |   | 2<br>(28.57) | 5<br>(71.43)  |
|      | Inpatient                 | 5<br>(100)  |   |              |              | 5<br>(100)    | 2<br>(40)    | 3<br>(60)    | 5<br>(100)  |   | 1<br>(20)    | 4<br>(80)    | 4<br>(80)     | 1<br>(20)    |   |              | 5<br>(100)    |
|      | Men                       | 12<br>(100) |   | 1<br>(8.33)  | 1<br>(8.33)  | 10<br>(83.33) | 4<br>(33.33) | 6<br>(66.67) | 12<br>(100) |   | 4<br>(33.33) | 6<br>(66.67) | 11<br>(91.67) | 1<br>(8.33)  |   | 2<br>(16.67) | 10<br>(83.33) |

TOB=Tobramycin GEN=Gentamicin NAL=Nalidixic acid CIP=Ciprofloxacin FOF=Fosfomicin NIT=Nitrofurantoin SXT=Trimethoprim-sulfamethoxazole

Table S80: Resistances to non-beta-lactams (%) of *Serratia marcescens* in 2017.

|      |                       | TOB |       | GEN |       | NAL |       | CIP |       | FOF |       | NIT |       | SXT |       |
|------|-----------------------|-----|-------|-----|-------|-----|-------|-----|-------|-----|-------|-----|-------|-----|-------|
|      |                       | R   | S     | R   | S     | R   | S     | R   | S     | R   | S     | R   | S     | R   | S     |
| 2017 | Total                 | 8   | (100) | 8   | (100) | 8   | (100) | 8   | (100) | 8   | (100) | 8   | (100) | 8   | (100) |
|      | Clean catch midstream | 7   | (100) | 7   | (100) | 7   | (100) | 7   | (100) | 7   | (100) | 7   | (100) | 7   | (100) |
|      | Urinary catheter      | 1   | (100) | 1   | (100) | 1   | (100) | 1   | (100) | 1   | (100) | 1   | (100) | 1   | (100) |
|      | Children              | 1   | (100) | 1   | (100) | 1   | (100) | 1   | (100) | 1   | (100) | 1   | (100) | 1   | (100) |
|      | Adults                | 1   | (100) | 1   | (100) | 1   | (100) | 1   | (100) | 1   | (100) | 1   | (100) | 1   | (100) |
|      | Elderly               | 6   | (100) | 6   | (100) | 6   | (100) | 6   | (100) | 6   | (100) | 6   | (100) | 6   | (100) |
|      | Outpatient            | 4   | (100) | 4   | (100) | 4   | (100) | 4   | (100) | 4   | (100) | 4   | (100) | 4   | (100) |
|      | Inpatient             | 4   | (100) | 4   | (100) | 4   | (100) | 4   | (100) | 4   | (100) | 4   | (100) | 4   | (100) |
|      | Men                   | 4   | (100) | 4   | (100) | 4   | (100) | 4   | (100) | 4   | (100) | 4   | (100) | 4   | (100) |
|      | Women                 | 4   | (100) | 4   | (100) | 4   | (100) | 4   | (100) | 4   | (100) | 4   | (100) | 4   | (100) |

TOB=Tobramycin GEN=Gentamicin NAL=Nalidixic acid CIP=Ciprofloxacin FOF=Fosfomycin NIT=Nitrofurantoin SXT=Trimethoprim-sulfamethoxazole

Table S81: Resistances to non-beta-lactams (%) of *Serratia marcescens* in 2018.

|      |                           | TOB |       | GEN |       | NAL |       | CIP |       | FOF |       | NIT          |              | SXT |       |
|------|---------------------------|-----|-------|-----|-------|-----|-------|-----|-------|-----|-------|--------------|--------------|-----|-------|
|      |                           | R   | S     | R   | S     | R   | S     | R   | S     | R   | S     | R            | S            | R   | S     |
| 2018 | Total                     | 6   | (100) | 6   | (100) | 5   | (100) | 6   | (100) | 6   | (100) | 5<br>(83.33) | 1<br>(16.67) | 6   | (100) |
|      | Permanent catheterization | 1   | (100) | 1   | (100) | 1   | (100) | 1   | (100) | 1   | (100) | 1            | (100)        | 1   | (100) |
|      | Clean catch midstream     | 3   | (100) | 3   | (100) | 2   | (100) | 3   | (100) | 3   | (100) | 2<br>(66.67) | 1<br>(33.33) | 3   | (100) |
|      | Urinary catheter          | 2   | (100) | 2   | (100) | 2   | (100) | 2   | (100) | 2   | (100) | 2            | (100)        | 2   | (100) |
|      | Adults                    | 2   | (100) | 2   | (100) | 2   | (100) | 2   | (100) | 2   | (100) | 1<br>(50)    | 1<br>(50)    | 2   | (100) |
|      | Elderly                   | 4   | (100) | 4   | (100) | 3   | (100) | 4   | (100) | 4   | (100) | 4            | (100)        | 4   | (100) |
|      | Outpatient                | 2   | (100) | 2   | (100) | 2   | (100) | 2   | (100) | 2   | (100) | 1<br>(50)    | 1<br>(50)    | 2   | (100) |
|      | Inpatient                 | 4   | (100) | 4   | (100) | 3   | (100) | 4   | (100) | 4   | (100) | 4            | (100)        | 4   | (100) |
|      | Men                       | 4   | (100) | 4   | (100) | 3   | (100) | 4   | (100) | 4   | (100) | 3<br>(75)    | 1<br>(25)    | 4   | (100) |
|      | Women                     | 2   | (100) | 2   | (100) | 2   | (100) | 2   | (100) | 2   | (100) | 2            | (100)        | 2   | (100) |

TOB=Tobramycin GEN=Gentamicin NAL=Nalidixic acid CIP=Ciprofloxacin FOF=Fosfomycin NIT=Nitrofurantoin SXT=Trimethoprim-sulfamethoxazole



Table S82: Resistances to non-beta-lactams (%) of *Serratia marcescens* in 2019.

|      |                           | TOB         |   | GEN         |   | NAL          |               | CIP          |               | FOF         |               | NIT         |   | SXT         |             |               |
|------|---------------------------|-------------|---|-------------|---|--------------|---------------|--------------|---------------|-------------|---------------|-------------|---|-------------|-------------|---------------|
|      |                           | R           | S | R           | S | R            | S             | R            | S             | R           | S             | R           | S | R           | I           | S             |
| 2019 | Total                     | 19<br>(100) |   | 19<br>(100) |   | 2<br>(10.53) | 17<br>(89.47) | 2<br>(10.53) | 17<br>(89.47) | 1<br>(5.26) | 18<br>(94.74) | 19<br>(100) |   | 1<br>(5.26) | 1<br>(5.26) | 17<br>(89.47) |
|      | Permanent catheterization | 4<br>(100)  |   | 4<br>(100)  |   | 1<br>(25)    | 3<br>(75)     | 1<br>(25)    | 3<br>(75)     |             | 4<br>(100)    | 4<br>(100)  |   | 1<br>(25)   |             | 3<br>(75)     |
|      | Clean catch midstream     | 10<br>(100) |   | 10<br>(100) |   | 1<br>(10)    | 9<br>(90)     | 1<br>(10)    | 9<br>(90)     | 1<br>(10)   | 9<br>(90)     | 10<br>(100) |   |             | 1<br>(10)   | 9<br>(90)     |
|      | Urinary catheter          | 5<br>(100)  |   | 5<br>(100)  |   |              | 5<br>(100)    |              | 5<br>(100)    |             | 5<br>(100)    | 5<br>(100)  |   |             |             | 5<br>(100)    |
|      | Children                  | 3<br>(100)  |   | 3<br>(100)  |   |              | 3<br>(100)    |              | 3<br>(100)    |             | 3<br>(100)    | 3<br>(100)  |   |             |             | 3<br>(100)    |
|      | Adults                    | 11<br>(100) |   | 11<br>(100) |   | 2<br>(18.18) | 9<br>(81.82)  | 2<br>(18.18) | 9<br>(81.82)  | 1<br>(9.09) | 10<br>(90.91) | 11<br>(100) |   | 1<br>(9.09) | 1<br>(9.09) | 9<br>(81.82)  |
|      | Elderly                   | 5<br>(100)  |   | 5<br>(100)  |   |              | 5<br>(100)    |              | 5<br>(100)    |             | 5<br>(100)    | 5<br>(100)  |   |             |             | 5<br>(100)    |
|      | Outpatient                | 8<br>(100)  |   | 8<br>(100)  |   | 1<br>(12.5)  | 7<br>(87.5)   | 1<br>(12.5)  | 7<br>(87.5)   | 1<br>(12.5) | 7<br>(87.5)   | 8<br>(100)  |   |             | 1<br>(12.5) | 7<br>(87.5)   |
|      | Inpatient                 | 11<br>(100) |   | 11<br>(100) |   | 1<br>(9.09)  | 10<br>(90.91) | 1<br>(9.09)  | 10<br>(90.91) |             | 11<br>(100)   | 11<br>(100) |   | 1<br>(9.09) |             | 10<br>(90.91) |
|      | Men                       | 10<br>(100) |   | 10<br>(100) |   | 2<br>(20)    | 8<br>(80)     | 2<br>(20)    | 8<br>(80)     | 1<br>(10)   | 9<br>(90)     | 10<br>(100) |   | 1<br>(10)   | 1<br>(10)   | 8<br>(80)     |
|      | Women                     | 9<br>(100)  |   | 9<br>(100)  |   |              | 9<br>(100)    |              | 9<br>(100)    |             | 9<br>(100)    | 9<br>(100)  |   |             |             | 9<br>(100)    |

TOB=Tobramycin GEN=Gentamicin NAL=Nalidixic acid CIP=Ciprofloxacin FOF=Fosfomicin NIT=Nitrofurantoin SXT=Trimethoprim-sulfamethoxazole

Table S83: Resistances to non-beta-lactams (%) of *Serratia marcescens* in 2020.

|      |                           | TOB |       | GEN |       | NAL |       | CIP |       | FOF |         | NIT |         | SXT |       |
|------|---------------------------|-----|-------|-----|-------|-----|-------|-----|-------|-----|---------|-----|---------|-----|-------|
|      |                           | R   | S     | R   | S     | R   | S     | R   | S     | R   | S       | R   | S       | R   | S     |
| 2020 | Total                     | 8   | (100) | 8   | (100) | 8   | (100) | 8   | (100) | 1   | (12.5)  | 7   | (87.5)  | 8   | (100) |
|      | Nephrostomy catheter      | 1   | (100) | 1   | (100) | 1   | (100) | 1   | (100) | 1   | (100)   | 1   | (100)   | 1   | (100) |
|      | Permanent catheterization | 2   | (100) | 2   | (100) | 2   | (100) | 2   | (100) | 1   | (50)    | 1   | (50)    | 2   | (100) |
|      | Clean catch midstream     | 3   | (100) | 3   | (100) | 3   | (100) | 3   | (100) | 3   | (100)   | 3   | (100)   | 3   | (100) |
|      | Urinary catheter          | 2   | (100) | 2   | (100) | 2   | (100) | 2   | (100) | 2   | (100)   | 2   | (100)   | 2   | (100) |
|      | Adults                    | 4   | (100) | 4   | (100) | 4   | (100) | 4   | (100) | 1   | (25)    | 3   | (75)    | 4   | (100) |
|      | Elderly                   | 4   | (100) | 4   | (100) | 4   | (100) | 4   | (100) | 4   | (100)   | 4   | (100)   | 4   | (100) |
|      | Outpatient                | 3   | (100) | 3   | (100) | 3   | (100) | 3   | (100) | 3   | (100)   | 3   | (100)   | 3   | (100) |
|      | Inpatient                 | 5   | (100) | 5   | (100) | 5   | (100) | 5   | (100) | 1   | (20)    | 4   | (80)    | 5   | (100) |
|      | Men                       | 7   | (100) | 7   | (100) | 7   | (100) | 7   | (100) | 1   | (14.29) | 6   | (85.71) | 7   | (100) |
|      | Women                     | 1   | (100) | 1   | (100) | 1   | (100) | 1   | (100) | 1   | (100)   | 1   | (100)   | 1   | (100) |

TOB=Tobramycin GEN=Gentamicin NAL=Nalidixic acid CIP=Ciprofloxacin FOF=Fosfomycin NIT=Nitrofurantoin SXT=Trimethoprim-sulfamethoxazole

Table S84: Resistances to non-beta-lactams (%) of *Serratia marcescens* in 2021.

|      |                           | TOB |       | GEN |       | NAL |       | CIP |       | FOF |       | NIT |       | SXT |       |
|------|---------------------------|-----|-------|-----|-------|-----|-------|-----|-------|-----|-------|-----|-------|-----|-------|
|      |                           | R   | S     | R   | S     | R   | S     | R   | S     | R   | S     | R   | S     | R   | S     |
| 2021 | Total                     | 2   | (100) | 2   | (100) | 2   | (100) | 2   | (100) | 2   | (100) | 2   | (100) | 2   | (100) |
|      | Permanent catheterization | 1   | (100) | 1   | (100) | 1   | (100) | 1   | (100) | 1   | (100) | 1   | (100) | 1   | (100) |
|      | Clean catch midstream     | 1   | (100) | 1   | (100) | 1   | (100) | 1   | (100) | 1   | (100) | 1   | (100) | 1   | (100) |
|      | Elderly                   | 2   | (100) | 2   | (100) | 2   | (100) | 2   | (100) | 2   | (100) | 2   | (100) | 2   | (100) |
|      | Outpatient                | 1   | (100) | 1   | (100) | 1   | (100) | 1   | (100) | 1   | (100) | 1   | (100) | 1   | (100) |
|      | Inpatient                 | 1   | (100) | 1   | (100) | 1   | (100) | 1   | (100) | 1   | (100) | 1   | (100) | 1   | (100) |
|      | Men                       | 2   | (100) | 2   | (100) | 2   | (100) | 2   | (100) | 2   | (100) | 2   | (100) | 2   | (100) |

TOB=Tobramycin GEN=Gentamicin NAL=Nalidixic acid CIP=Ciprofloxacin FOF=Fosfomycin NIT=Nitrofurantoin SXT=Trimethoprim-sulfamethoxazole
